# Supplementary material for: Constraining uncertainty in the timescale of angiosperm evolution and the veracity of a Cretaceous Terrestrial Revolution
Source: PubMed Central journal article supplement (PMC6055841; doi:10.1111/nph.15011), 2018-02-05
Supplement: NPH-218-819-s001.pdf [file NPH-218-819-s001.pdf]

# **Constraining uncertainty in the timescale of angiosperm evolution and the veracity of a Cretaceous Terrestrial Revolution**

Jose Barba-Montoya, Mario dos Reis, Harald Schneider, Philip C. J. Donoghue and Ziheng Yang

SUPPLEMENTARY FIGURES 1-6 (pages 2-15)

SUPPLEMENTARY TABLES S1-S3 (pages 16-22)

NOTES S1 – JUSTIFICATION OF FOSSIL CALIBRATIONS (pages 23-44)

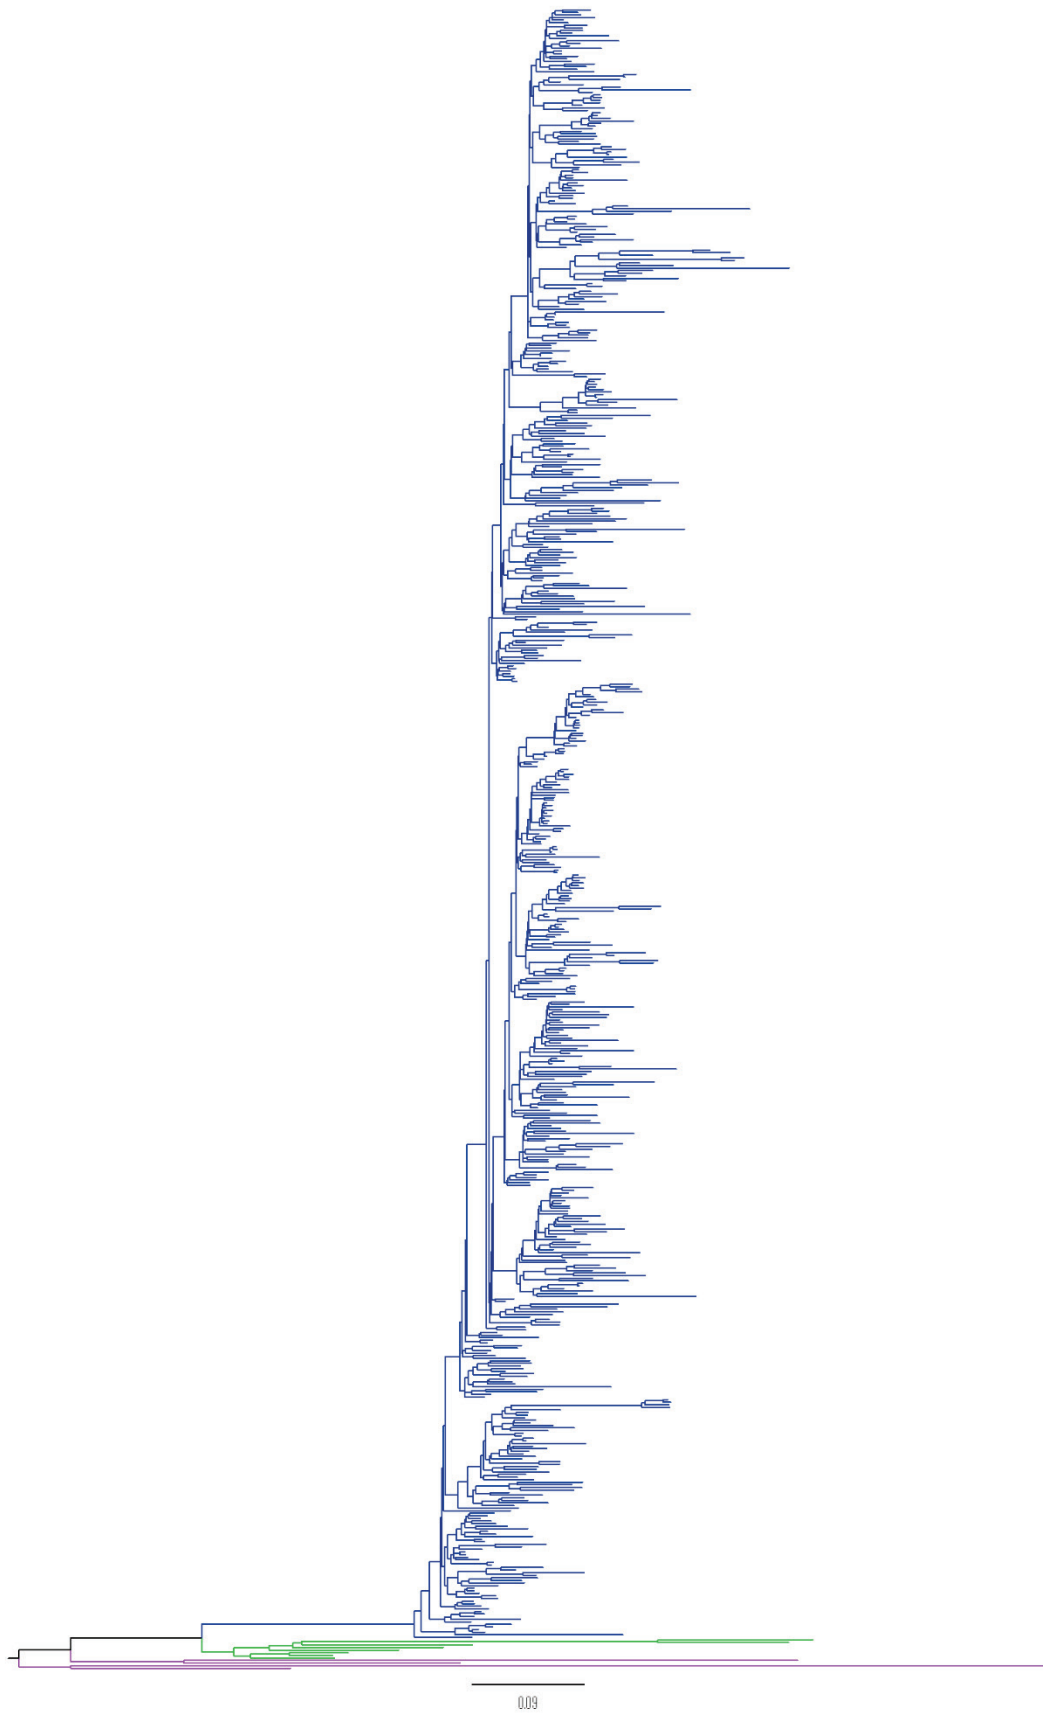

**Figure S1. ML Phylogenetic tree from plastid 1st-2nd codon positions for 643 taxa.** The Phylogeny was estimated using the GTR+GAMMA model and 1 partition (plastid 1st-2nd). The major lineages of tracheophytes are highlighted: lycophytes and ferns (purple), acrogymnosperms (green) and angiosperms (blue).

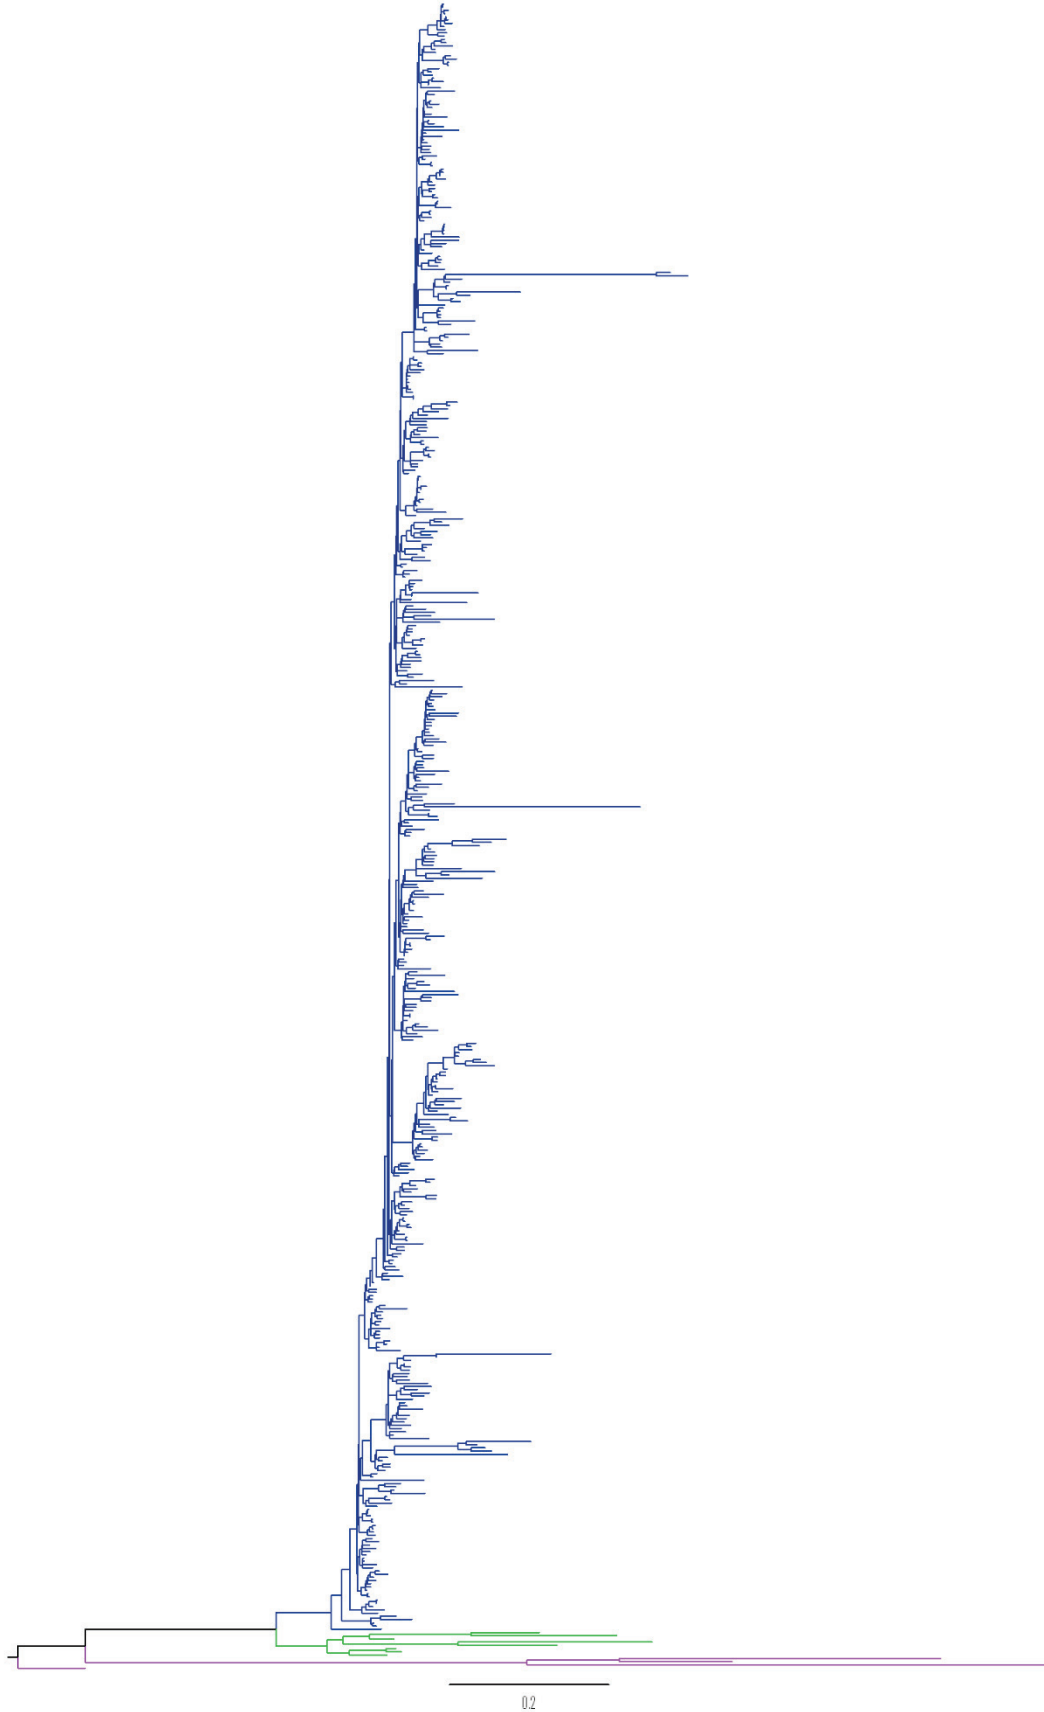

**Figure S2. ML Phylogenetic tree from mitochondrial 1st-2nd codon positions for 515 taxa.** The Phylogeny was estimated using the GTR+GAMMA model and 1 partition (mitochondrial 1st-2nd). The major lineages of tracheophytes are highlighted: lycophytes and ferns (purple), acrogymnosperms (green) and angiosperms (blue).

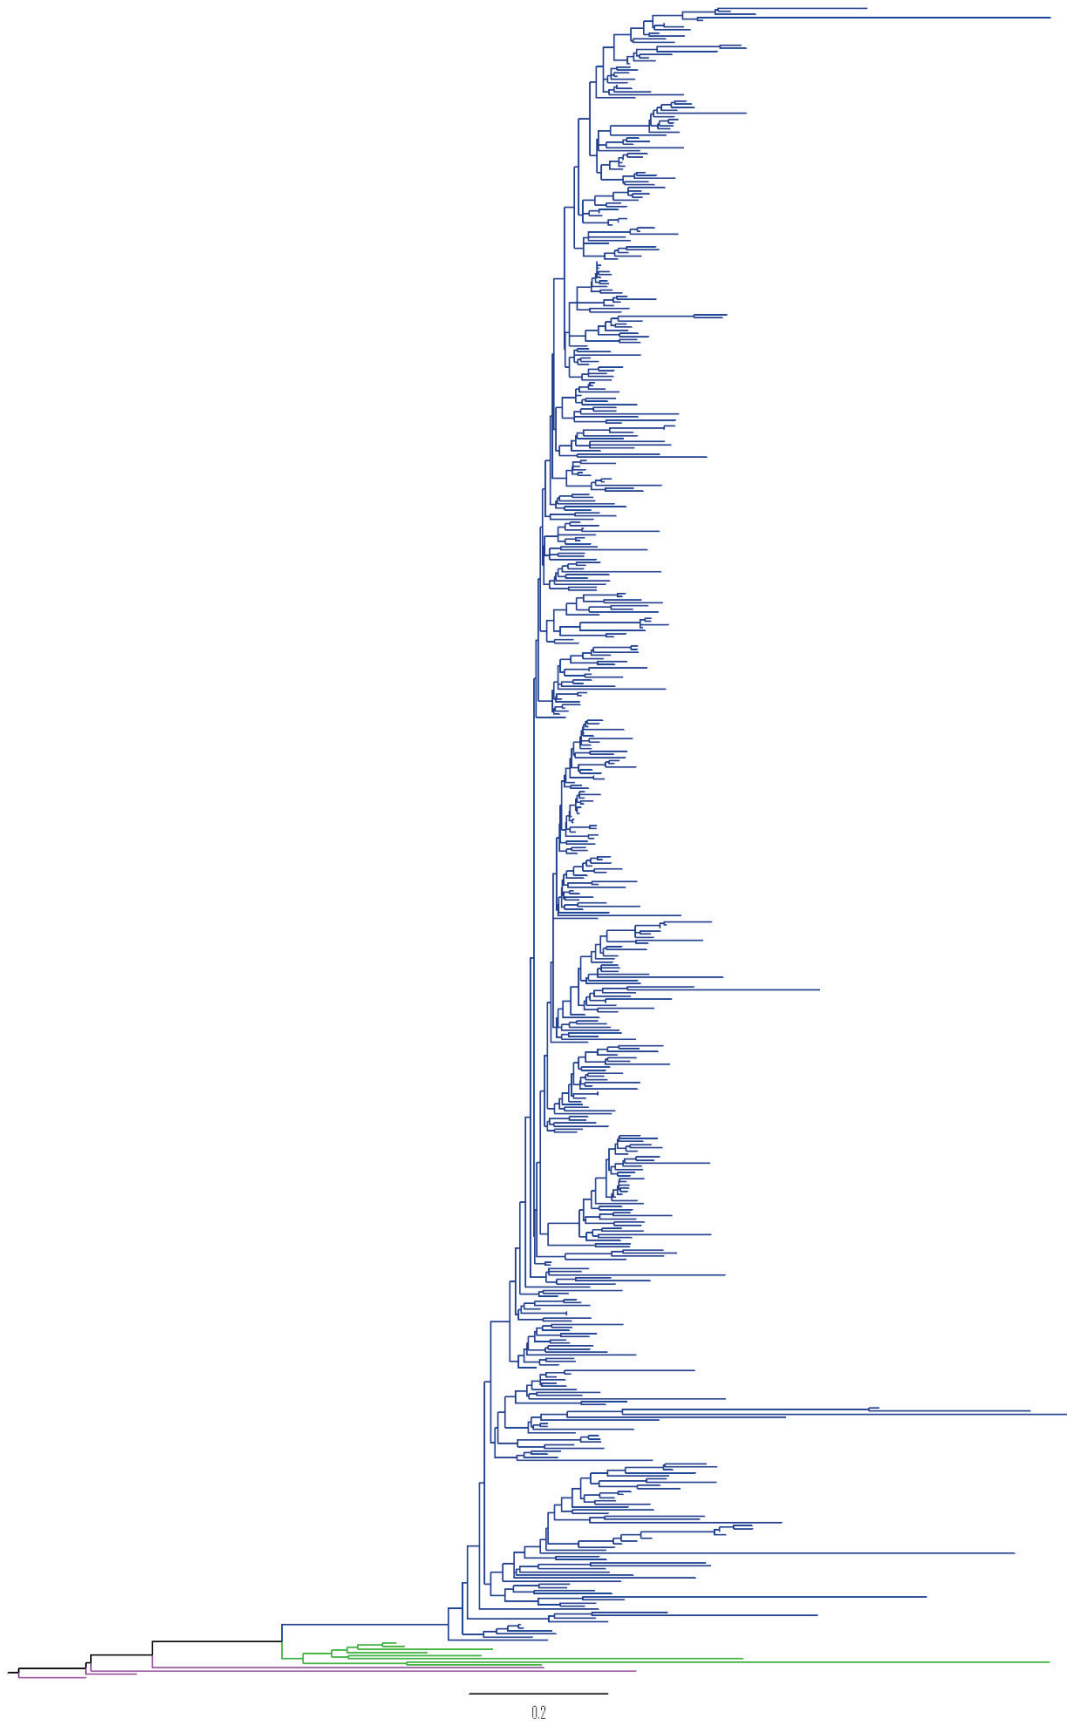

**Figure S3. ML Phylogenetic tree from nuclear RNA genes for 540 taxa.** The Phylogeny was estimated using the GTR+GAMMA model and 1 partition (nuclear RNA genes). The major lineages of tracheophytes are highlighted: lycophytes and ferns (purple), acrogymnosperms (green) and angiosperms (blue).

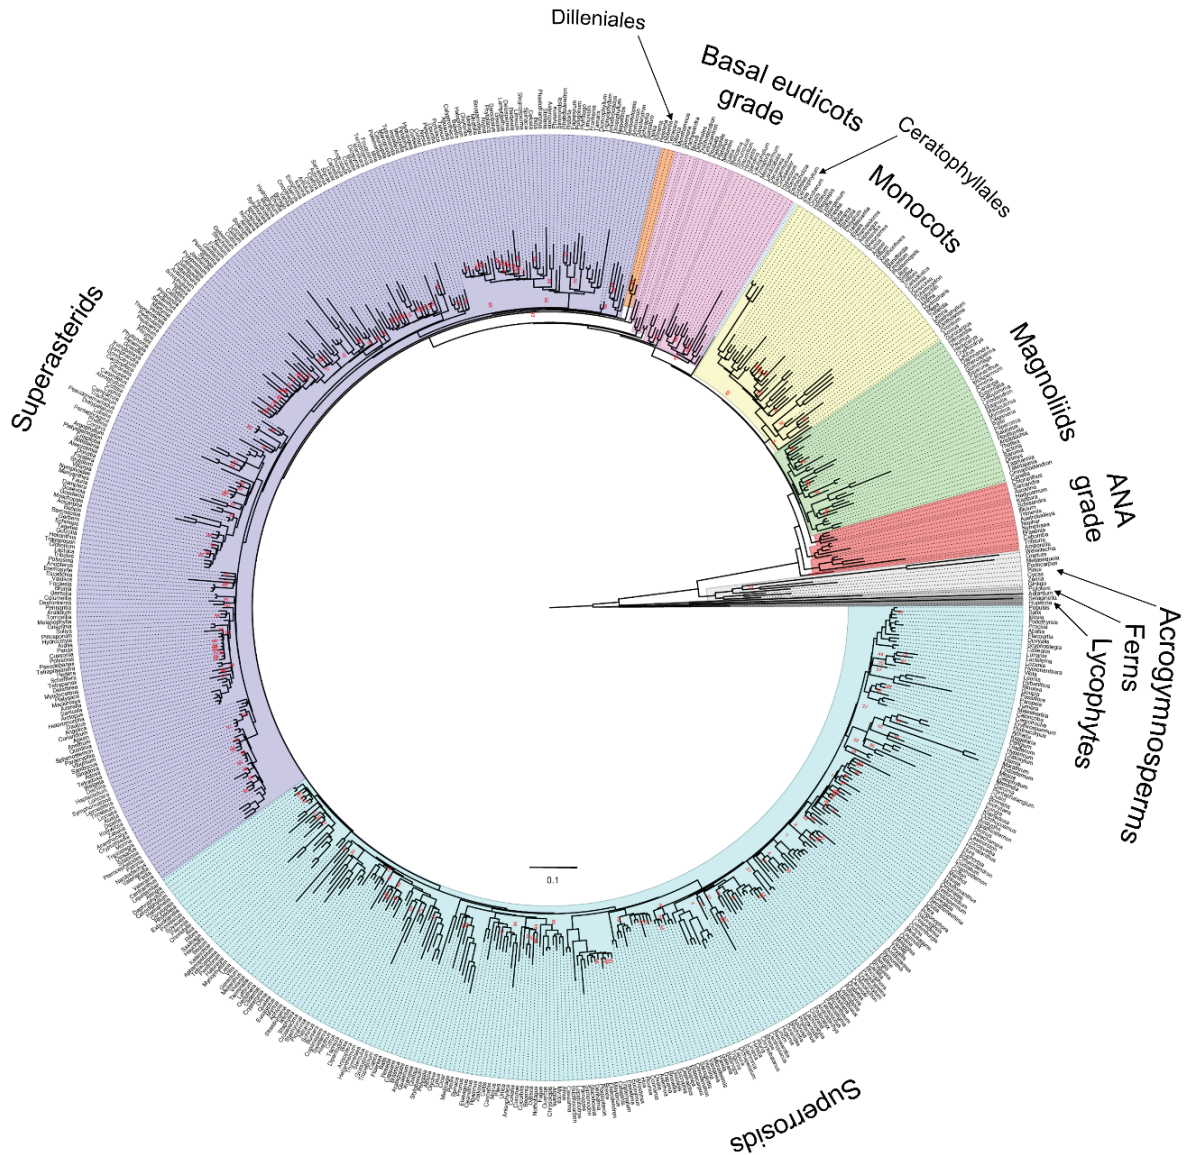

**Figure S4. RAxML Phylogenetic tree from the 83 genes and 644 taxa of tracheophytes.** The Phylogeny was estimated using the GTR+GAMMA model, using five partitions (plastid 1st-2nd, plastid 3rd, mitochondrial 1st-2nd, mitochondrial 3rd and nuclear RNA genes). Bootstrap support values of 100 % were excluded, while other support values < 100 % are reported directly with red numbers on nodes. The major lineages of tracheophytes and major groups of angiosperms are highlighted: lycophytes (dark grey) and ferns (middle grey), acrogymnosperms (pale grey), ANA grade (red), magnoliids (green), monocots (yellow), Ceratophyllales (pale blue), basal eudicots grade (pink), Dilleniales (orange), superasteriids (purple) and superrosids (blue).

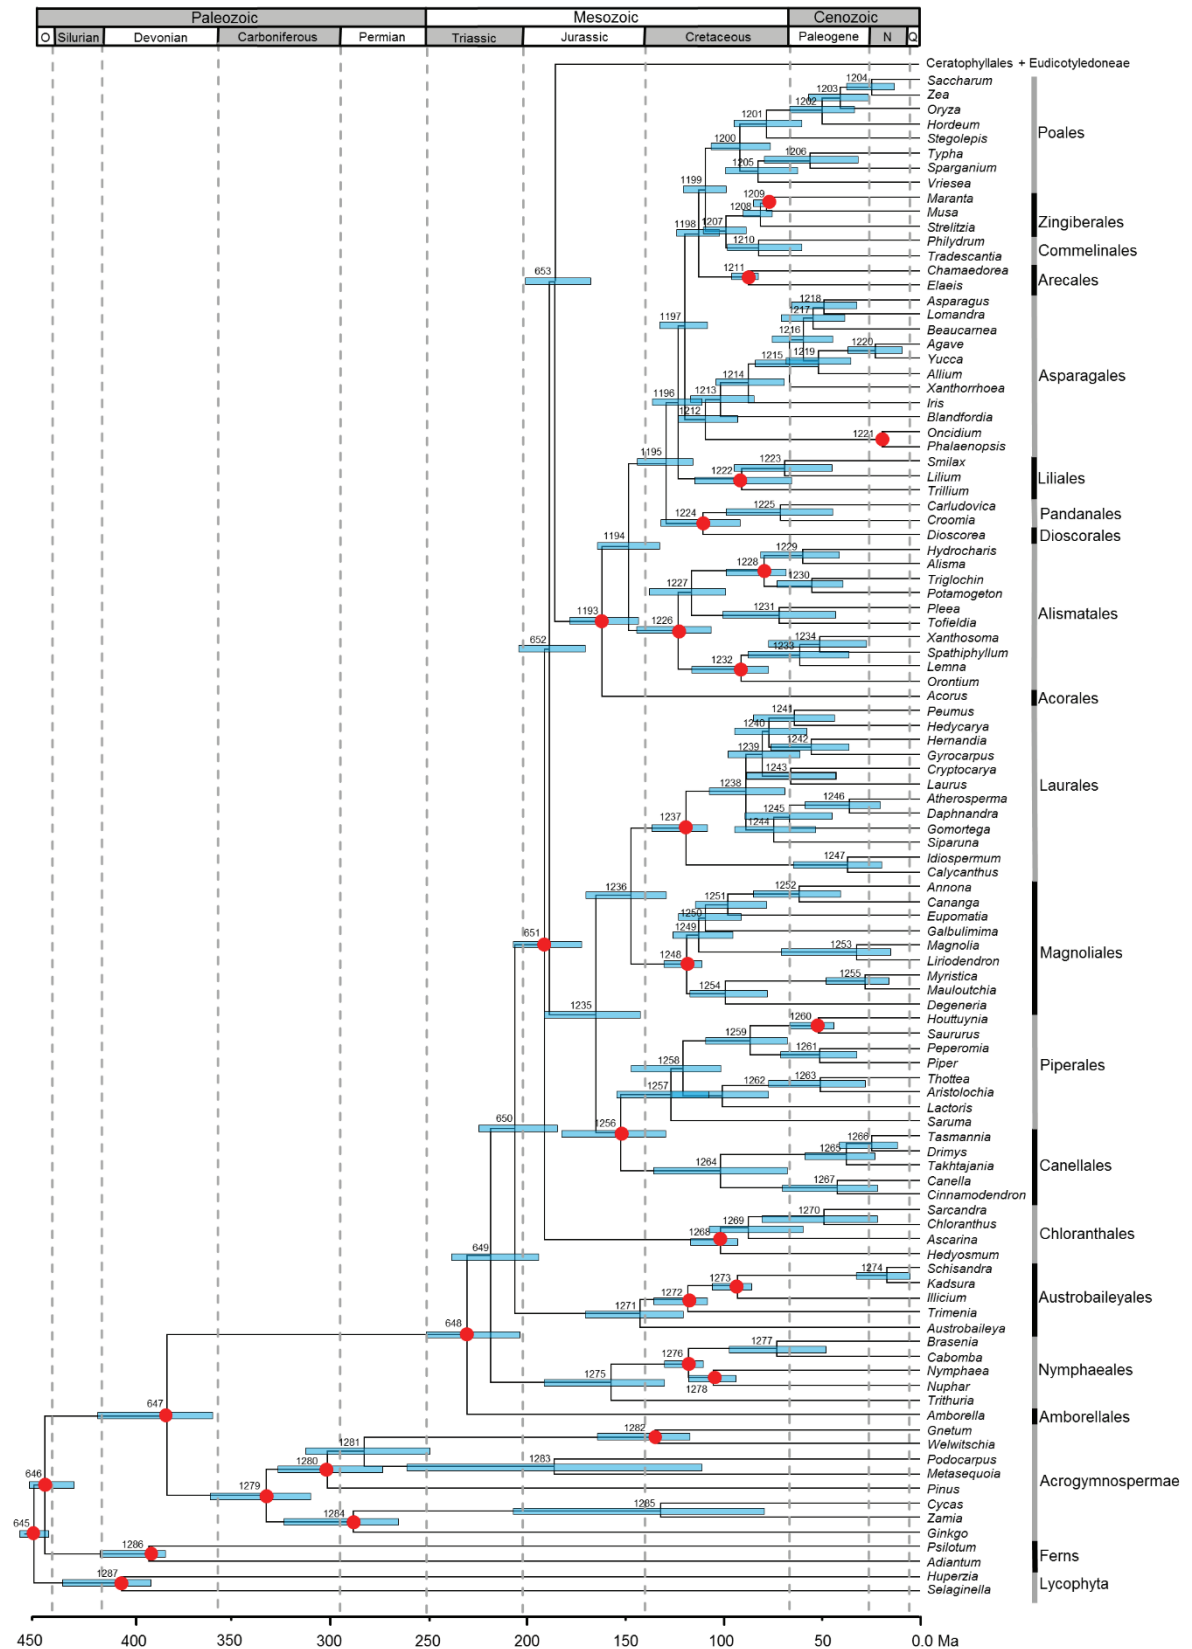

**Figure S5. Chronogram of 644 taxa of tracheophytes (from SA-IR-3P). Blue bars represent the 95% HPD credibility intervals for the node ages. Red dots represent calibrated nodes. Divergence times were estimated using calibration strategy A, HKY85+Γ5 substitution model, independent rates model, with the 83 genes subdivided into three partitions: (1) 1st and 2nd codon positions for plastid genes; (2) 1st and 2nd codon positions for mitochondrial genes; and (3) nuclear RNA genes.**

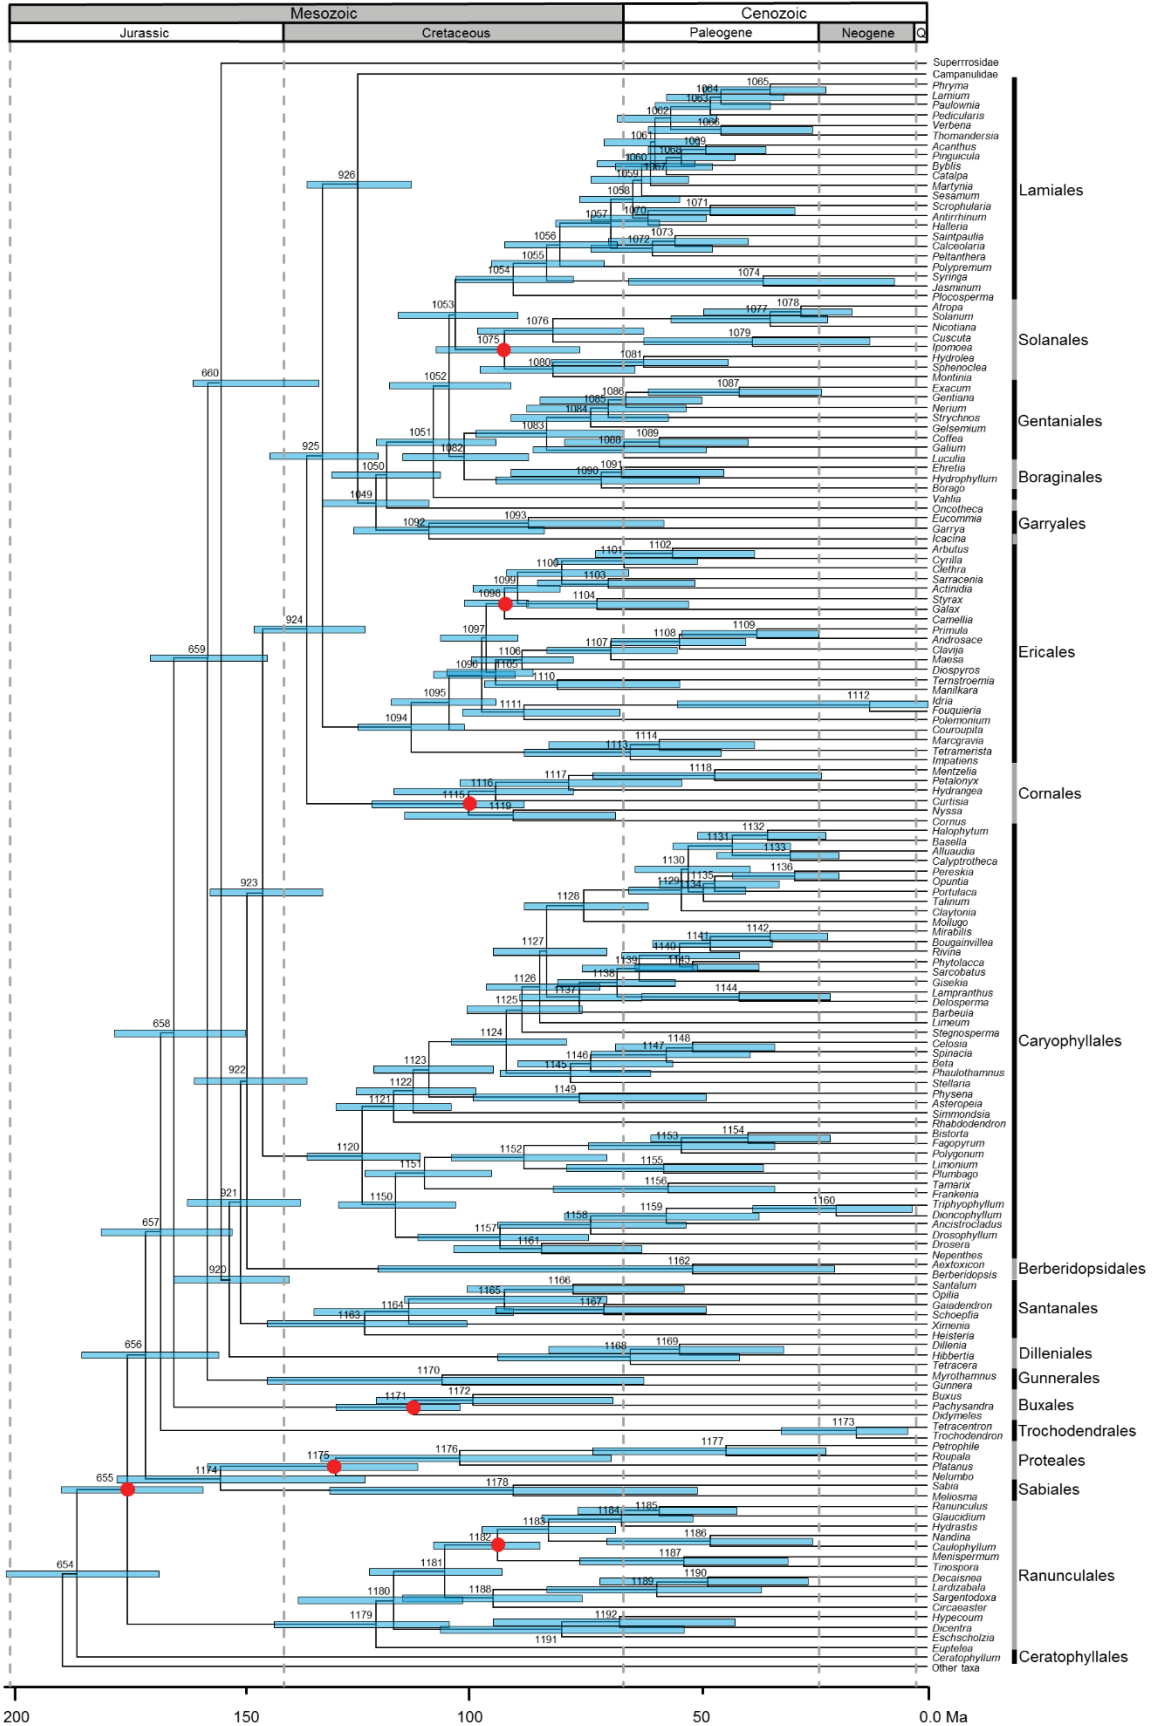

Figure S5.1. Chronogram of 644 taxa of tracheophytes (from SA-IR-3P). Continued

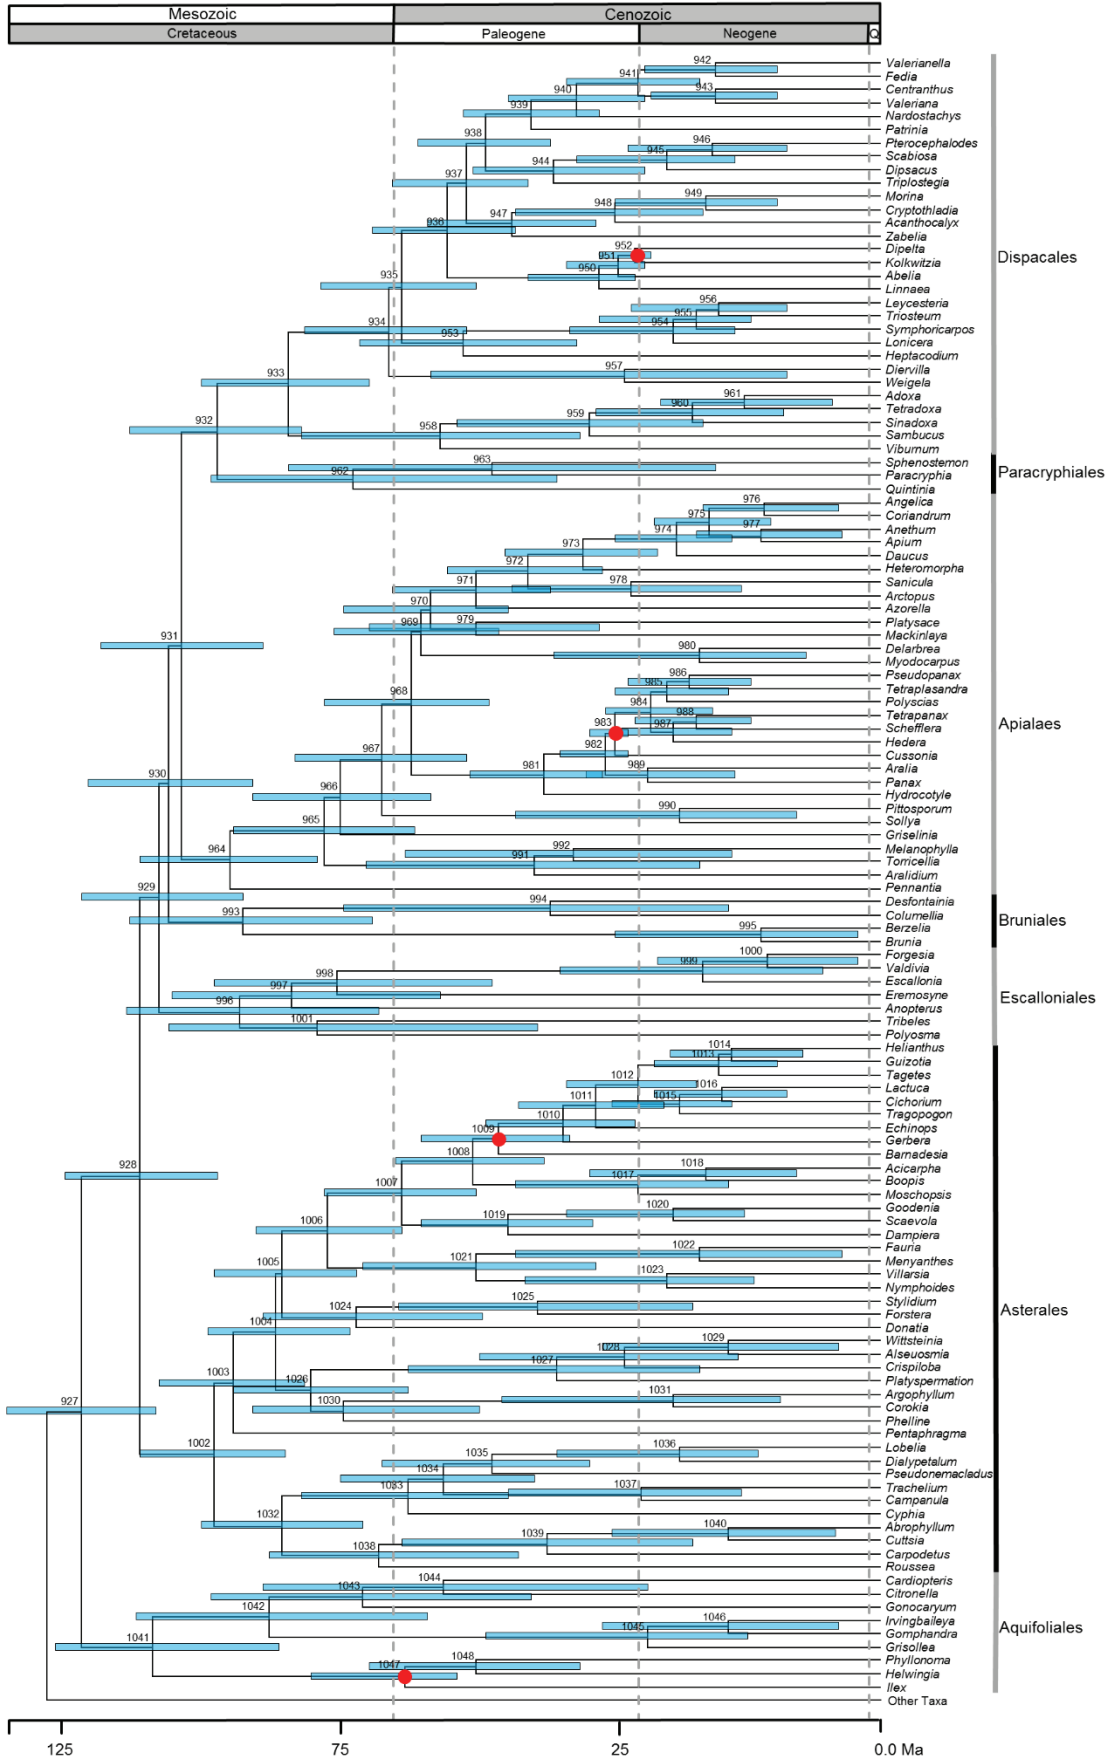

Figure S5.2. Chronogram of 644 taxa of tracheophytes (from SA-IR-3P).



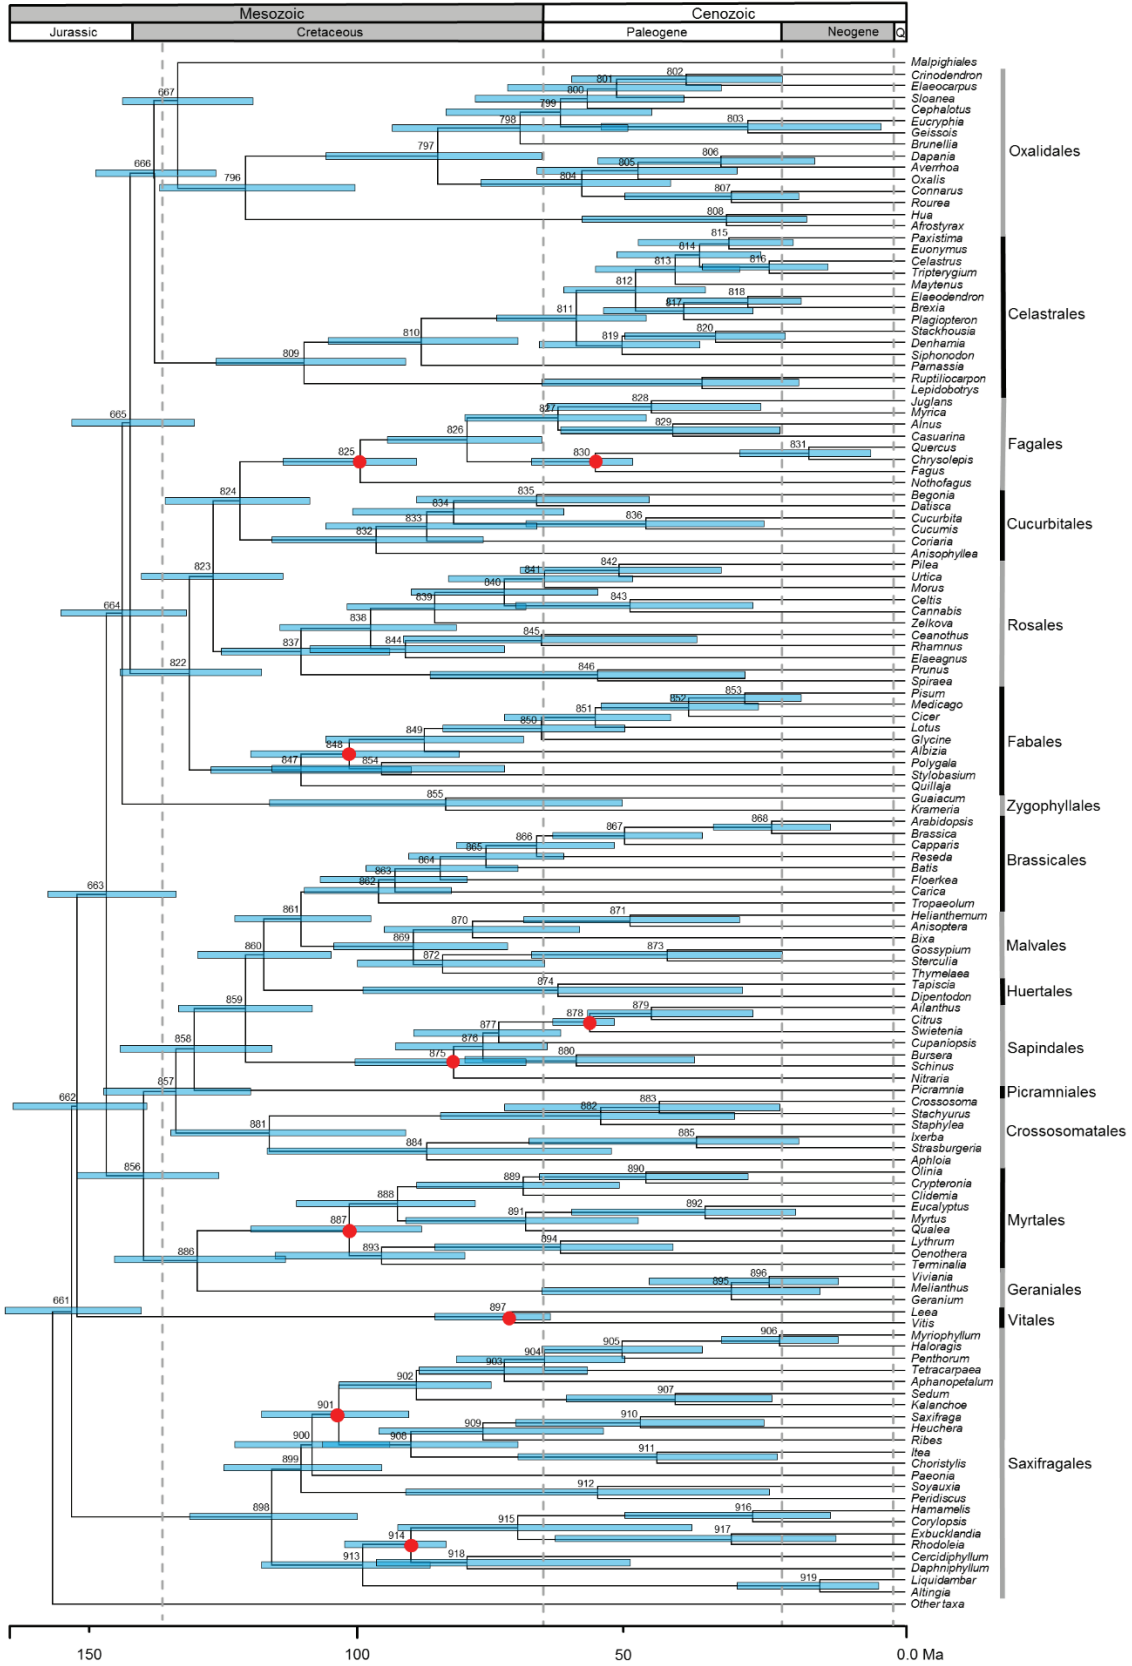

Figure S5.3. Chronogram of 644 taxa of tracheophytes (from SA-IR-3P).

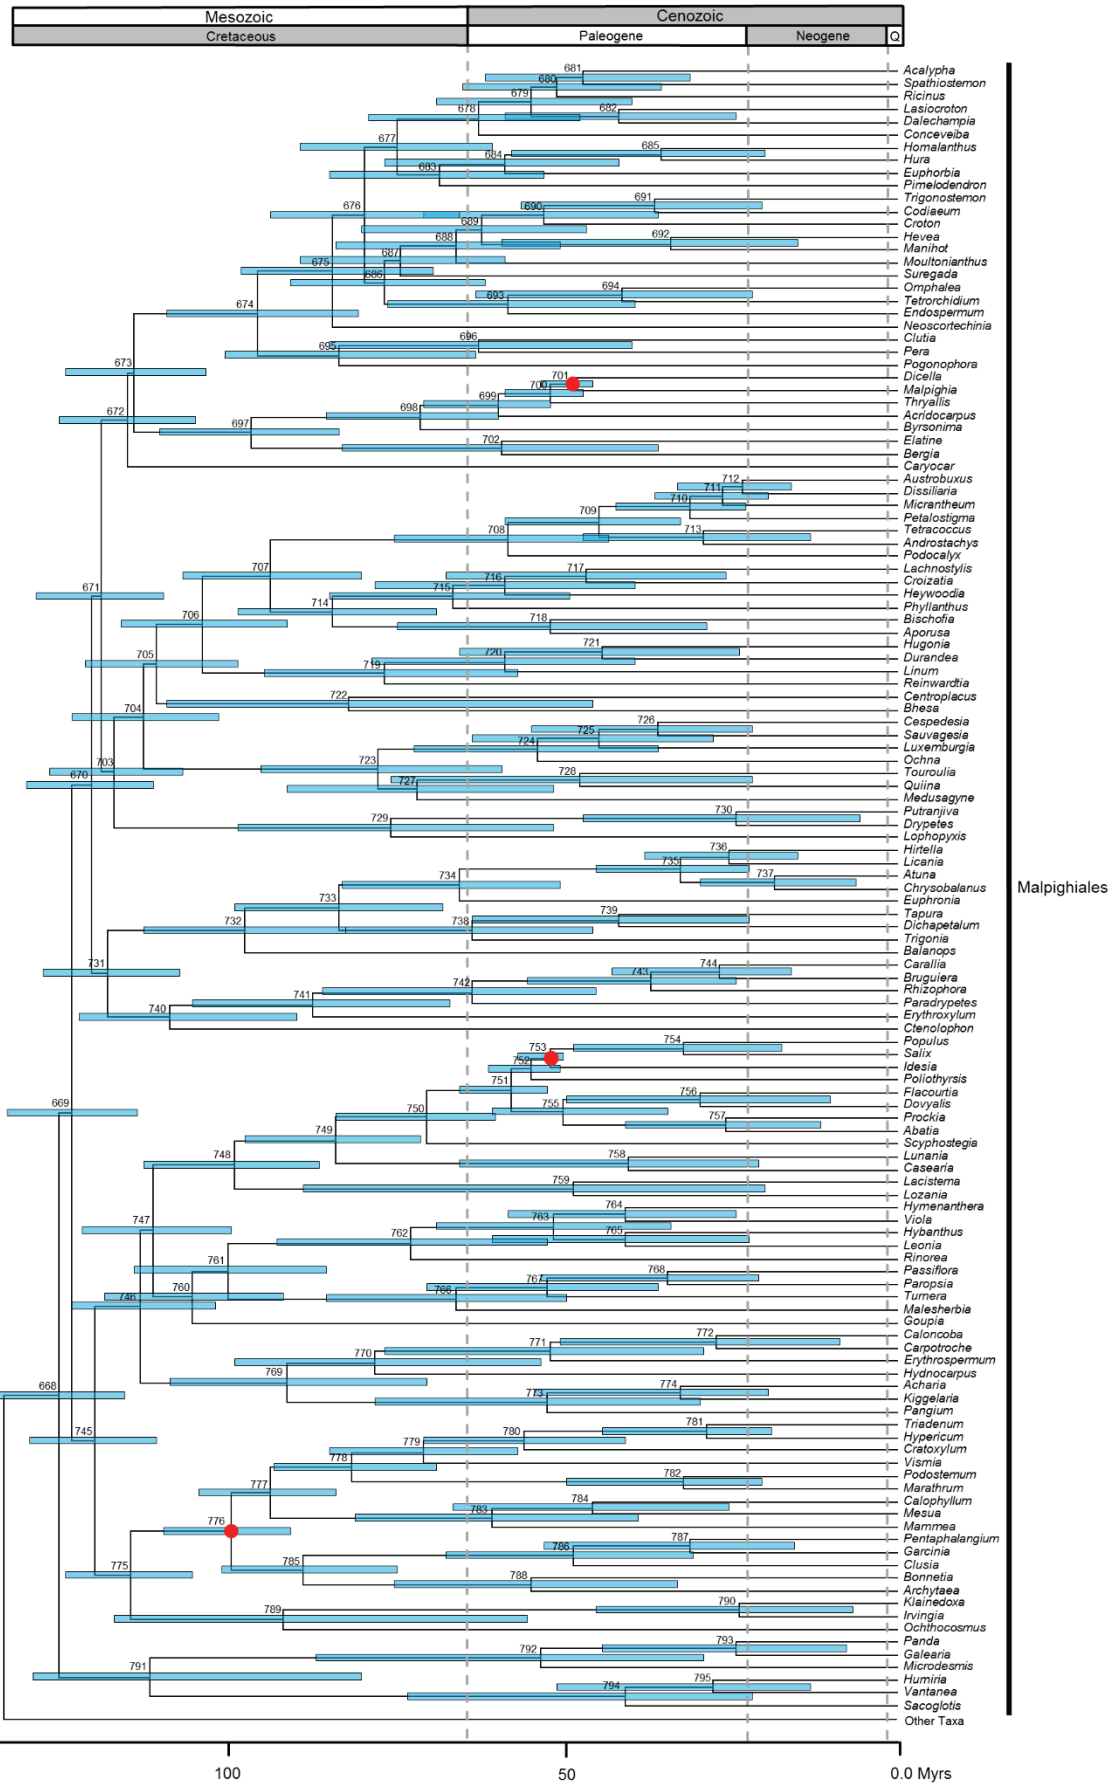

Figure S5.4. Chronogram of 644 taxa of tracheophytes (from SA-IR-3P).

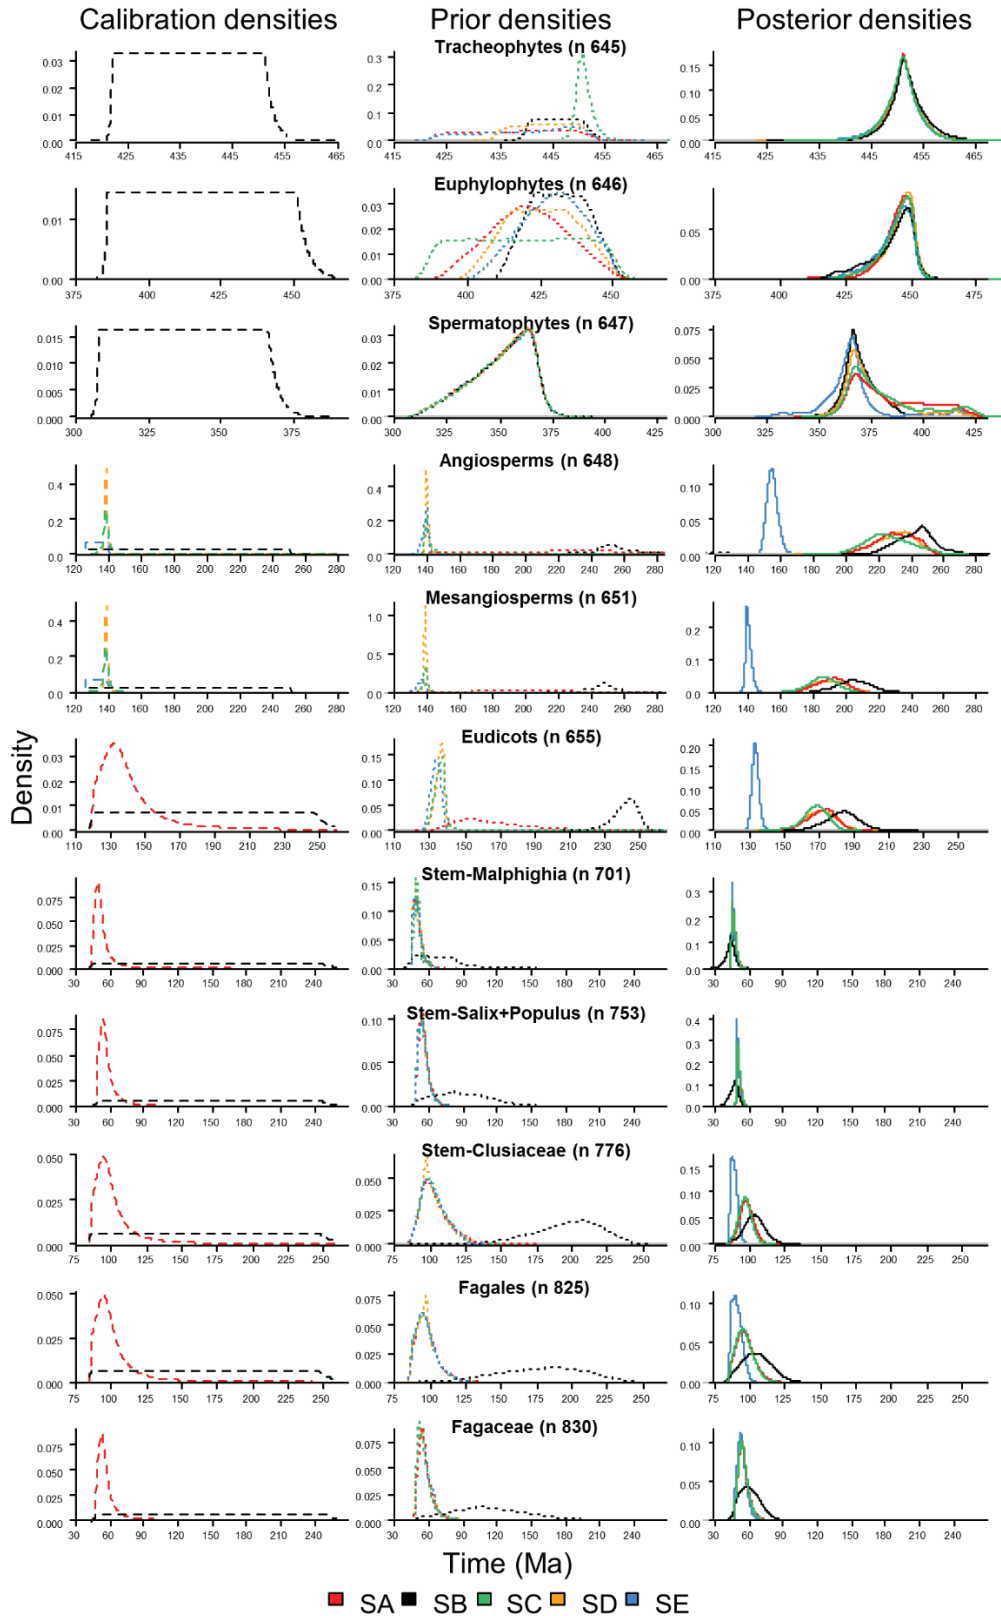

**Figure S6. Calibration, prior and posterior densities for 52 calibrated nodes in the tree and for the five calibration strategies.** Fossil calibrations are shown as dashed lines, priors as dotted lines and posterior as solid lines. Nodes are numbered as in Supplementary Fig. 1. Estimates were obtained using the HKY85+ $\Gamma$ 5 substitution model, independent rates model, with the 83 genes subdivided into three partitions: (1) 1st and 2nd codon positions for plastid genes; (2) 1st and 2nd codon positions for mitochondrial genes; and (3) nuclear RNA genes. Colouring relates to the calibration strategy (SA, SB, SC, SD, SE) as in Figure 1.

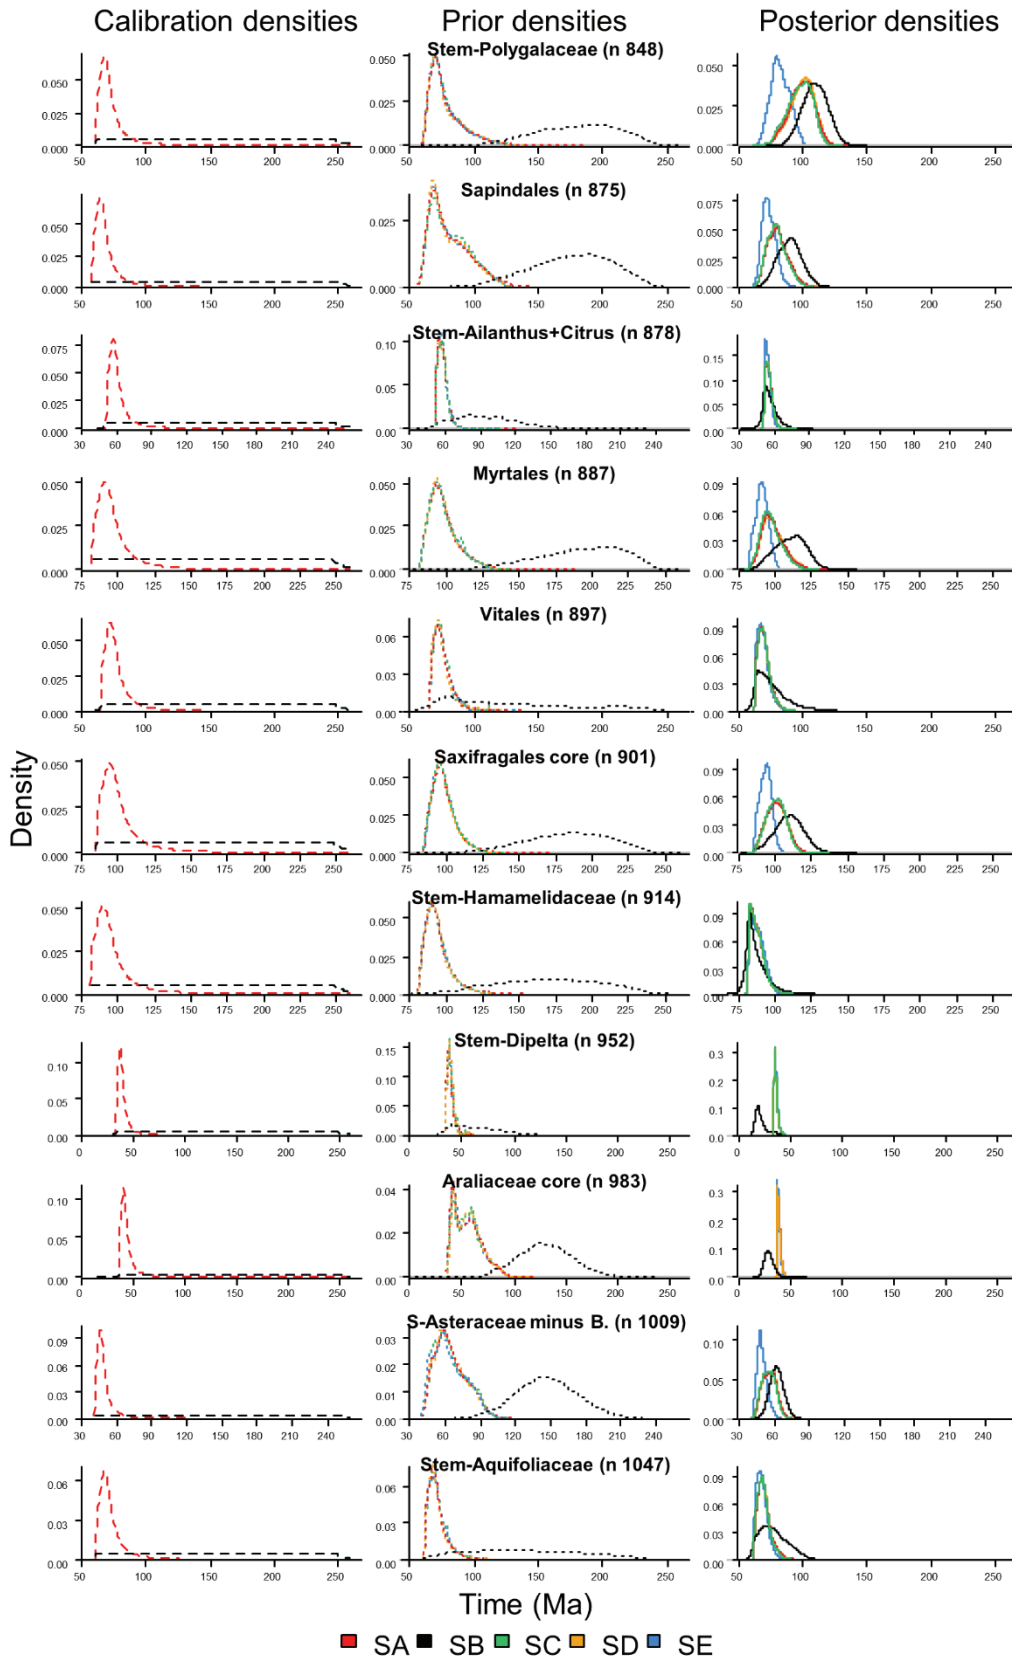

Figure S6.1. Calibration, prior and posterior densities for 52 calibrated nodes in the tree and for the 5 calibration strategies. Continued.

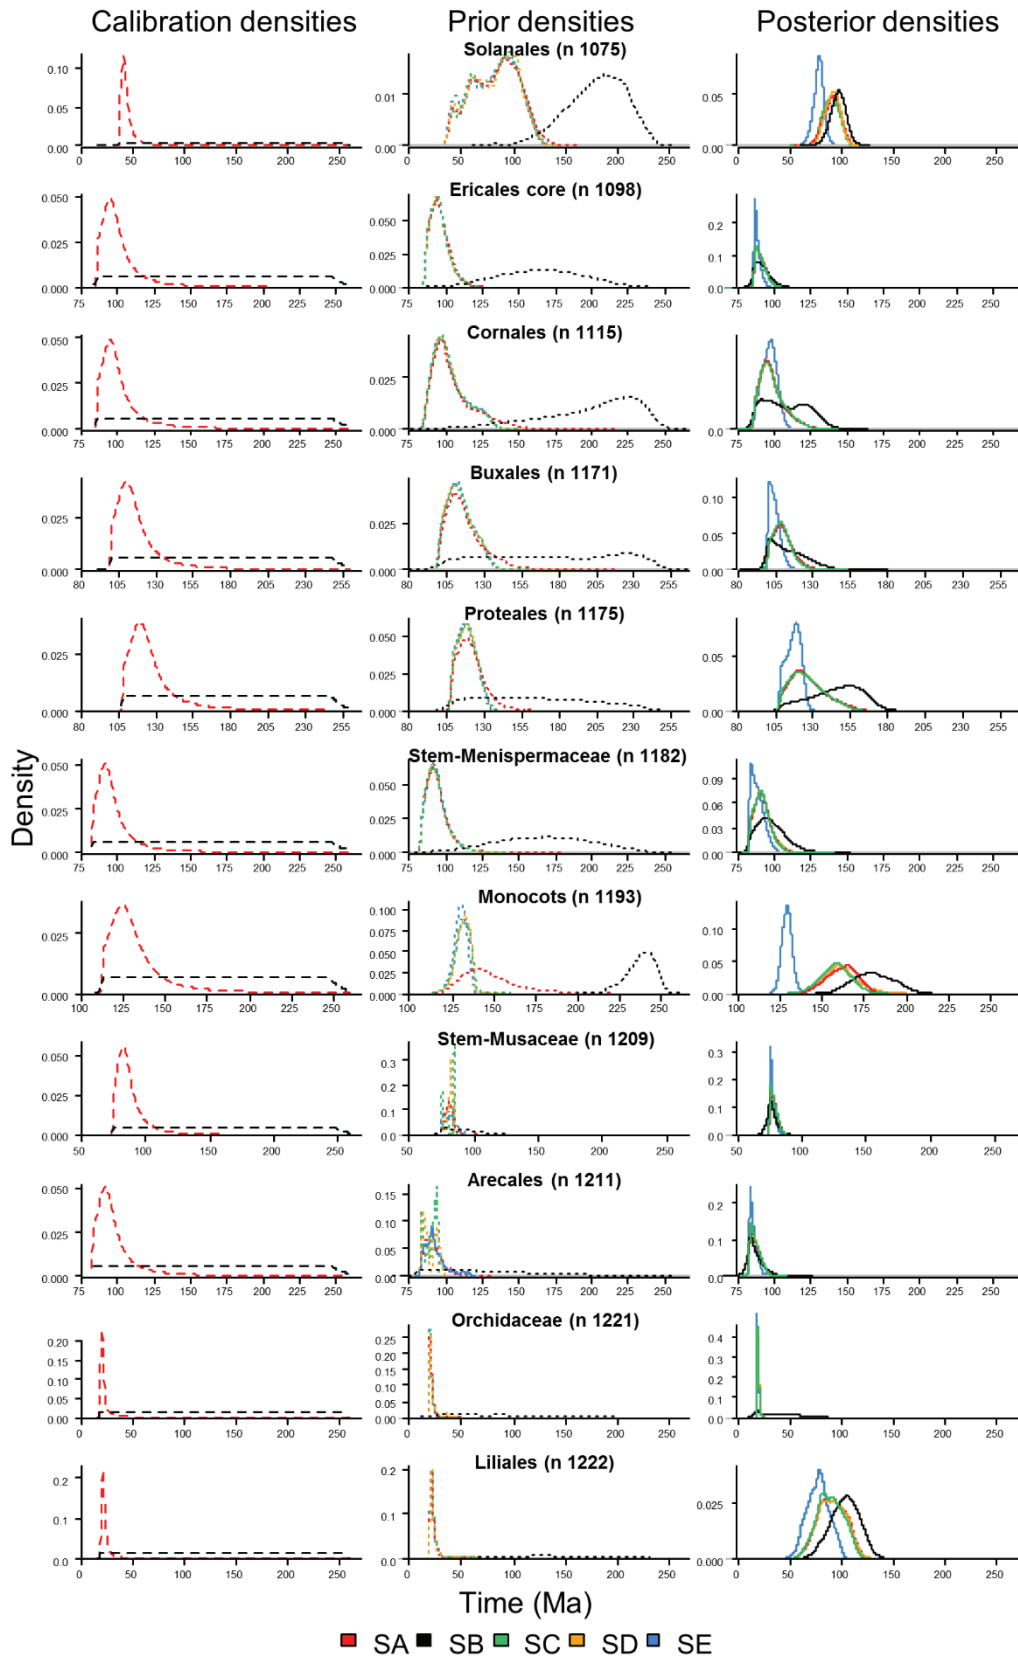

Figure S6.2. Calibration, prior and posterior densities for 52 calibrated nodes in the tree and for the 5 calibration strategies. Continued.

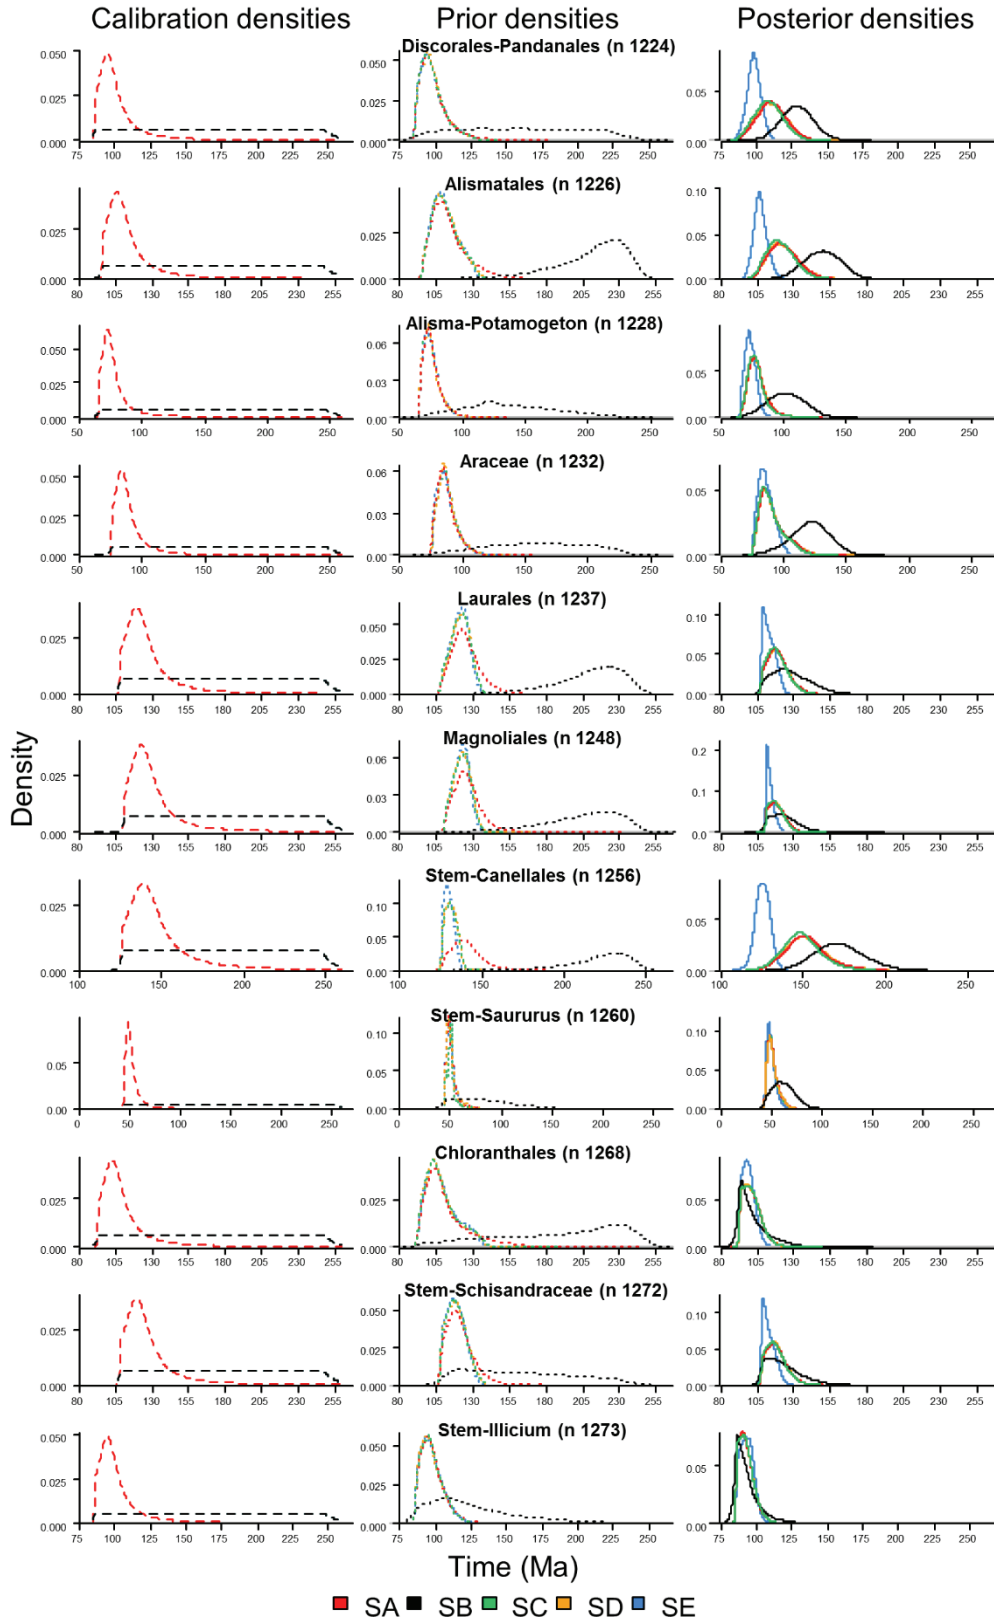

Figure S6.3. Calibration, prior and posterior densities for 52 calibrated nodes in the tree and for the 5 calibration strategies. Continued.

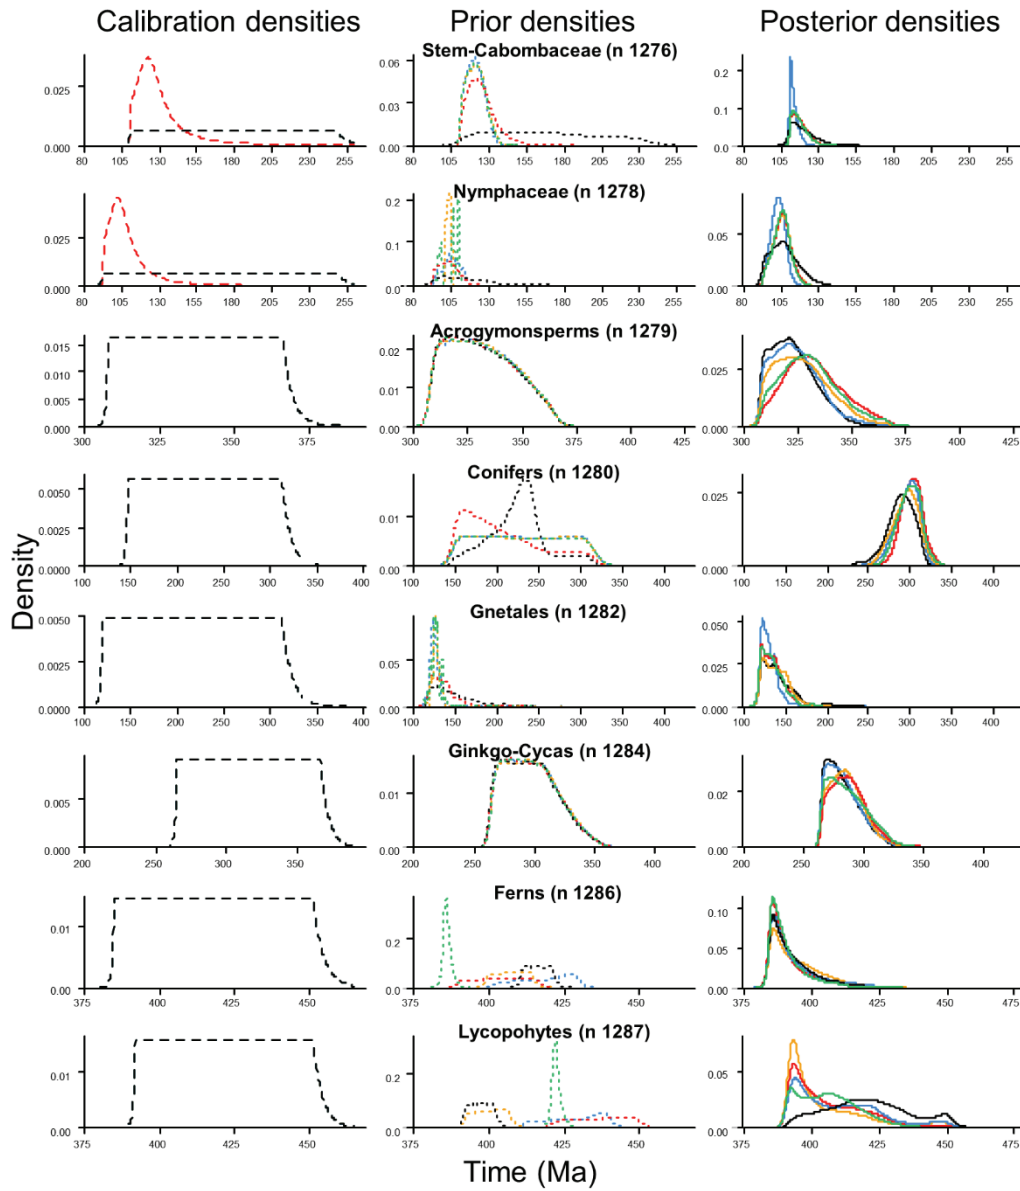

■ SA ■ SB ■ SC ■ SD ■ SE

Figure S6.4. Calibration, prior and posterior densities for 52 calibrated nodes in the tree and for the 5 calibration strategies. Continued.

**Table S1. List of genes included in the dataset. Tree lengths for each gene were obtained using RAxML under GTR+GAMMA model.**

| gene              | No. taxa | # sites | tree length | gene                       | No. taxa | # sites | tree length |
|-------------------|----------|---------|-------------|----------------------------|----------|---------|-------------|
| Plastid Genes     |          |         |             | Plastid Genes              |          |         |             |
| <i>accD</i>       | 83       | 1200    | 7.03        | <i>psbJ</i>                | 109      | 120     | 6.26        |
| <i>atpA</i>       | 110      | 1518    | 6.98        | <i>psbK</i>                | 110      | 126     | 5.31        |
| <i>atpB</i>       | 559      | 1548    | 21.24       | <i>psbL</i>                | 108      | 111     | 2.9         |
| <i>atpE</i>       | 108      | 387     | 7.25        | <i>psbM</i>                | 107      | 102     | 4.47        |
| <i>atpF</i>       | 105      | 543     | 7.49        | <i>psbZ</i>                | 106      | 183     | 5.06        |
| <i>atpH</i>       | 110      | 240     | 5.62        | <i>rbcL</i>                | 627      | 1497    | 43.26       |
| <i>atpI</i>       | 109      | 741     | 7.34        | <i>rpl14</i>               | 109      | 363     | 7.04        |
| <i>ccsA</i>       | 109      | 672     | 10.56       | <i>rpl16</i>               | 110      | 393     | 8.86        |
| <i>cemA</i>       | 108      | 654     | 7.42        | <i>rpl2</i>                | 100      | 813     | 4.49        |
| <i>clpP</i>       | 102      | 582     | 12.32       | <i>rpl20</i>               | 108      | 336     | 9.49        |
| <i>infA</i>       | 77       | 222     | 6.42        | <i>rpl22</i>               | 94       | 318     | 10.21       |
| <i>matk</i>       | 588      | 2421    | 50.09       | <i>rpl23</i>               | 99       | 270     | 3.72        |
| <i>ndhA</i>       | 102      | 1086    | 8.97        | <i>rpl32</i>               | 102      | 129     | 10.96       |
| <i>ndhB</i>       | 98       | 1530    | 3.25        | <i>rpl33</i>               | 108      | 195     | 7.24        |
| <i>ndhC</i>       | 100      | 360     | 5.76        | <i>rpl36</i>               | 110      | 108     | 6.58        |
| <i>ndhD</i>       | 102      | 1488    | 9.71        | <i>rpoA</i>                | 108      | 978     | 9.61        |
| <i>ndhE</i>       | 103      | 300     | 8.19        | <i>rpoB</i>                | 108      | 3207    | 8.23        |
| <i>ndhF</i>       | 509      | 2928    | 43.81       | <i>rpoC1</i>               | 102      | 2157    | 8.08        |
| <i>ndhG</i>       | 101      | 525     | 9.22        | <i>rpoC2</i>               | 398      | 8604    | 28.96       |
| <i>ndhH</i>       | 101      | 1173    | 6.9         | <i>rps11</i>               | 109      | 414     | 11.43       |
| <i>ndhI</i>       | 101      | 465     | 6.16        | <i>rps12</i>               | 104      | 369     | 5.28        |
| <i>ndhJ</i>       | 100      | 468     | 5.55        | <i>rps14</i>               | 109      | 294     | 7.51        |
| <i>ndhK</i>       | 96       | 855     | 7.32        | <i>rps15</i>               | 104      | 255     | 11.61       |
| <i>petA</i>       | 108      | 891     | 8.72        | <i>rps16</i>               | 95       | 234     | 7.35        |
| <i>petB</i>       | 110      | 642     | 6.30        | <i>rps18</i>               | 107      | 294     | 10.83       |
| <i>petD</i>       | 108      | 471     | 6.41        | <i>rps19</i>               | 109      | 273     | 8.57        |
| <i>petG</i>       | 110      | 108     | 3.99        | <i>rps2</i>                | 107      | 705     | 7.54        |
| <i>petL</i>       | 102      | 183     | 3.44        | <i>rps4</i>                | 370      | 984     | 16.63       |
| <i>petN</i>       | 105      | 87      | 2.87        | <i>rps7</i>                | 108      | 465     | 3.3         |
| <i>psaA</i>       | 109      | 2235    | 6.24        | <i>rps8</i>                | 110      | 390     | 8.74        |
| <i>psaB</i>       | 109      | 2199    | 5.62        | <i>ycf2</i>                | 97       | 3813    | 5.91        |
| <i>psaC</i>       | 109      | 225     | 5.68        | <i>ycf3</i>                | 108      | 504     | 5.74        |
| <i>psaI</i>       | 107      | 108     | 7.15        | <i>ycf4</i>                | 106      | 549     | 7.57        |
| <i>psaJ</i>       | 108      | 123     | 6.58        | <b>Mitochondrial genes</b> |          |         |             |
| <i>psbA</i>       | 109      | 1056    | 4.18        | <i>atp1</i>                | 378      | 1713    | 11.03       |
| <i>psbB/N/T/H</i> | 343      | 2073    | 16.16       | <i>matr</i>                | 480      | 4236    | 10.85       |
| <i>psbC</i>       | 109      | 1356    | 6.31        | <i>nad5</i>                | 373      | 2073    | 5.60        |
| <i>psbD</i>       | 109      | 1056    | 4.65        | <i>rps3</i>                | 398      | 3171    | 21.05       |
| <i>psbE</i>       | 110      | 243     | 5.12        | <b>Nuclear RNA genes</b>   |          |         |             |
| <i>psbF</i>       | 109      | 117     | 2.97        | <i>rDNA 18S</i>            | 501      | 1769    | 29.03       |
| <i>psbI</i>       | 109      | 105     | 5.99        | <i>rDNA 26S</i>            | 368      | 3396    | 37.04       |



**Table S2. Basic information of data partitions.**

| Partition                                         | No. taxa | # sites | ML tree length | alpha |
|---------------------------------------------------|----------|---------|----------------|-------|
| <b>Nucleotide partitions</b>                      |          |         |                |       |
| Plastid 1 <sup>st</sup> & 2 <sup>nd</sup>         | 643      | 41021   | 22.541         | 0.519 |
| Plastid 3 <sup>rd</sup>                           | 643      | 20360   | 47.605         | 1.180 |
| Mitochondrial 1 <sup>st</sup> & 2 <sup>nd</sup>   | 515      | 5690    | 13.666         | 0.473 |
| Mitochondrial 3 <sup>rd</sup>                     | 515      | 2878    | 22.82          | 0.776 |
| Nuclear rDNA                                      | 540      | 5081    | 39.546         | 0.372 |
| All partitions concatenated as a single partition | 644      | 75030   | 29.41          | 0.486 |
| <b>Amino acid partitions</b>                      |          |         |                |       |
| Plastid proteins                                  | 643      | 21579   | 46.563         | 0.521 |
| Mitochondrial proteins                            | 515      | 3731    | 23.003         | 0.610 |

Tree length (sum of branch lengths) and gamma shape parameter ( $\alpha$ ) were estimated using RAxML under the GTR+GAMMA model for nucleotide partitions, the CPREV+GAMMA for plastid proteins and WAG+GAMMA for mitochondrial proteins.

**Table S3. Summary of Fossil calibrations used in this study in million years before the present.**

| Node | Clade                               | Stem/Crown | Minimum divergence time (Ma)                                                                                 | Maximum divergence time (Ma)                                                                            |
|------|-------------------------------------|------------|--------------------------------------------------------------------------------------------------------------|---------------------------------------------------------------------------------------------------------|
| 645  | Tracheophytes                       | Crown      | 422 († <i>Zosterophyllum</i> sp)                                                                             | 451 (oldest occurrence of trilete spores)                                                               |
| 646  | Euphyllophytes                      | Crown      | 385.57 († <i>Rellimia thomsonii</i> )                                                                        | 451 (oldest occurrence of trilete spores)                                                               |
| 647  | Spermatophytes                      | Crown      | 308.14 († <i>Cordaites iowensis</i> )                                                                        | 365.63 (base of Vco zone which contains the first seeds)                                                |
| 648  | Angiosperms                         | Crown      | 125.9 (tricolpate pollen)                                                                                    | 247.3 (sediments below the oldest occurrence of angiosperm like pollen which are devoid of such pollen) |
| 651  | Mesangiosperms                      | Crown      | 125.9 (tricolpate pollen)                                                                                    | 247.3 (sediments below the oldest occurrence of angiosperm like pollen which are devoid of such pollen) |
| 655  | Eudicots                            | Crown      | 119.6 († <i>Hyracantha decussata</i> )                                                                       | —                                                                                                       |
| 701  | <i>Malpighia</i>                    | Stem       | 44.83 († <i>Perisyncolporites pokorny</i> )                                                                  | —                                                                                                       |
| 753  | <i>Salix</i> plus <i>Populus</i>    | Stem       | 48.57 († <i>Pseudosalix handleyi</i> )                                                                       | —                                                                                                       |
| 776  | Clusiaceae                          | Stem       | 85.8 († <i>Paleoclusia chevalery</i> )                                                                       | —                                                                                                       |
| 825  | Fagales                             | Crown      | 85.8 († <i>Nothofagidites senectus</i> )                                                                     | —                                                                                                       |
| 830  | Fagaceae                            | Crown      | 47.6 († <i>Fagus langevini</i> )                                                                             | —                                                                                                       |
| 848  | Polygalaceae                        | Stem       | 61.6 († <i>Paleosecuridaca curisii</i> )                                                                     | —                                                                                                       |
| 875  | Sapindales                          | Crown      | 59.24 († <i>Dipteronia brownii</i> )                                                                         | —                                                                                                       |
| 878  | <i>Ailanthus</i> plus <i>Citrus</i> | Stem       | 51.83 († <i>Ailanthus confucii</i> )                                                                         | —                                                                                                       |
| 887  | Myrtales                            | Crown      | 83.3 († <i>Esqueiria futabensis</i> )                                                                        | —                                                                                                       |
| 897  | Vitales                             | Crown      | 65.5 († <i>Indovitis chitaleyae</i> )                                                                        | —                                                                                                       |
| 901  | Saxifragales core                   | Crown      | 85.8 († <i>Divisestylus brevistamineus</i> and † <i>D. longistamineus</i> )                                  | —                                                                                                       |
| 914  | Hamamelidaceae                      | Stem       | 82 († <i>Androdecidua endressii</i> )                                                                        | —                                                                                                       |
| 952  | <i>Dipelta</i>                      | Stem       | 33.7 († <i>Diplodipelta reniptera</i> )                                                                      | —                                                                                                       |
| 983  | Araliaceae core                     | Crown      | 37.3 († <i>Dendropanax eocenensis</i> )                                                                      | —                                                                                                       |
| 1009 | Asteraceae minus <i>Barnadesia</i>  | Stem       | 41.5 († <i>Tubulifloridites antipodica</i> )                                                                 | —                                                                                                       |
| 1047 | Aquifoliaceae                       | Stem       | 61.6 († <i>Ilex hercynica</i> )                                                                              | —                                                                                                       |
| 1075 | Solanales                           | Crown      | 37.3 († <i>Solanites crassus</i> )                                                                           | —                                                                                                       |
| 1098 | Ericales core                       | Crown      | 85.8 († <i>Paleoenkianthus sayrevillensis</i> )                                                              | —                                                                                                       |
| 1115 | Cornales                            | Crown      | 85.8 († <i>Tylerianthus crossmanensis</i> )                                                                  | —                                                                                                       |
| 1171 | Buxales                             | Crown      | 100.1 († <i>Spanomera marylandensis</i> )                                                                    | —                                                                                                       |
| 1175 | Proteales                           | Crown      | 107.59 († <i>Sapindopsis variabilis</i> , † <i>Aquia brookensis</i> and † <i>Palatonocarpus brookensis</i> ) | —                                                                                                       |
| 1182 | Menispermaceae                      | Stem       | 83.41 († <i>Prototinosmium testudinarum</i> and † <i>P. vangerowii</i> )                                     | —                                                                                                       |
| 1193 | Monocots                            | Crown      | 112.6 († <i>Liliacidites</i> )                                                                               | —                                                                                                       |
| 1209 | Musaceae                            | Stem       | 74.6 († <i>Spirematospermum chandlerae</i> )                                                                 | —                                                                                                       |
| 1211 | Arecales                            | Crown      | 83.41 († <i>Sabalites carolinensis</i> )                                                                     | —                                                                                                       |
| 1221 | Orchidaceae                         | Crown      | 17.82 († <i>Meliorchis caribea</i> )                                                                         | —                                                                                                       |
| 1222 | Liliales                            | Crown      | 18.7 († <i>Luzuriaga contortus</i> )                                                                         | —                                                                                                       |
| 1224 | Dioscoreales—<br>Pandanales         | Crown      | 85.8 († <i>Mabelia connatifila</i> )                                                                         | —                                                                                                       |
| 1226 | Alismatales                         | Crown      | 96.24 († <i>Mayoa portugallica</i> )                                                                         | —                                                                                                       |
| 1228 | <i>Alisma</i> — <i>Potamogeton</i>  | Crown      | 66 († <i>Cardstonia tolmanii</i> )                                                                           | —                                                                                                       |
| 1232 | Araceae                             | Crown      | 76 († <i>Lysichiton austriacus</i> )                                                                         | —                                                                                                       |
| 1237 | Laurales                            | Crown      | 107.59 († <i>Virginianthus calycanthoides</i> and † <i>Cohongarootonia hispida</i> )                         | —                                                                                                       |
| 1248 | Magnoliales                         | Crown      | 110.87 († <i>Schenkeriphyllum glanduliferum</i> and † <i>Endressinia brasiliiana</i> .)                      | —                                                                                                       |
| 1256 | Canellales                          | Stem       | 125.9 († <i>Walkeripollis gabonensis</i> )                                                                   | —                                                                                                       |
| 1260 | <i>Saururus</i>                     | Stem       | 44.3 († <i>Saururus tuckeriae</i> )                                                                          | —                                                                                                       |
| 1268 | Chloroanthaeles                     | Crown      | 92.8 († <i>Pennipolis</i> sp.)                                                                               | —                                                                                                       |
| 1272 | Schisandraceae                      | Stem       | 107.59 († <i>Anacostia virginiensis</i> )                                                                    | —                                                                                                       |
| 1273 | <i>Illicium</i>                     | Stem       | 85.44 († <i>Illiciospermum pusillum</i> )                                                                    | —                                                                                                       |
| 1276 | Cabombaceae                         | Stem       | 110.97 († <i>Pluricarpellatia peltata</i> )                                                                  | —                                                                                                       |
| 1278 | Nymphaeaceae                        | Crown      | 92.8 († <i>Monetianthus mirus</i> )                                                                          | —                                                                                                       |
| 1279 | Acrogymnospermae                    | Crown      | 308.14 († <i>Cordaites iowensis</i> )                                                                        | 365.63 (base of Vco zone which contains the first seeds)                                                |
| 1280 | Conifers                            | Crown      | 147 († <i>Rissikia media</i> )                                                                               | 312.38 (sediments bearing † <i>Cordaites iowensis</i> )                                                 |
| 1282 | Gnetales                            | Crown      | 119.6 († <i>Eoantha zherkihini</i> )                                                                         | 312.38 (sediments bearing † <i>Cordaites iowensis</i> )                                                 |
| 2284 | <i>Ginkgo</i> — <i>Cycas</i>        | Crown      | 264.7 († <i>Crossozamia</i> )                                                                                | 365.63 (base of Vco zone which contains the first seeds)                                                |
| 1286 | Ferns                               | Crown      | 384.71 († <i>Ibyka amphikoma</i> )                                                                           | 451 (oldest occurrence of trilete spores)                                                               |
| 1287 | Lycophytes                          | Crown      | 392.1 († <i>Leclercquia complexa</i> )                                                                       | 451 (oldest occurrence of trilete spores)                                                               |

Nodes are numbered as in Figure S2. Fossil taxa are indicated by a dagger (†) before their names.

**Table S4. The 95% HPD limits of posterior divergence times for selected nodes in the vascular plant tree under the 5 calibration strategies in millions of years before the present.**

| Node  | Clade                                     | SA-IR-3P |      | SB-IR-3P |      | SC-IR-3P |      | SD-IR-3P |      | SE-IR-3P |      | Composite |      |
|-------|-------------------------------------------|----------|------|----------|------|----------|------|----------|------|----------|------|-----------|------|
|       |                                           | Min.     | Max. | Min.     | Max. | Min.     | Max. | Min.     | Max. | Min.     | Max. | Min.      | Max. |
| 645*  | Tracheophytes                             | 444      | 458  | 444      | 460  | 443      | 458  | 443      | 458  | 442      | 458  | 442       | 458  |
| 646*  | Euphylophytes                             | 433      | 455  | 424      | 455  | 430      | 454  | 430      | 455  | 427      | 453  | 427       | 455  |
| 647*  | Spermatophytes                            | 360      | 418  | 356      | 387  | 359      | 422  | 356      | 413  | 340      | 418  | 340       | 422  |
| 648*  | Angiosperms                               | 206      | 253  | 219      | 266  | 201      | 255  | 203      | 256  | 149      | 162  | 149       | 256  |
| 651*  | Mesangiosperms                            | 173      | 208  | 183      | 225  | 168      | 203  | 171      | 210  | 138      | 145  | 138       | 210  |
| 655*  | Eudicots                                  | 156      | 186  | 164      | 201  | 152      | 181  | 155      | 188  | 129      | 137  | 129       | 188  |
| 661   | Superrosids                               | 136      | 160  | 141      | 173  | 134      | 157  | 136      | 162  | 118      | 126  | 118       | 162  |
| 662   | Rosids                                    | 135      | 159  | 140      | 172  | 133      | 155  | 135      | 160  | 117      | 125  | 117       | 160  |
| 668   | <b>Malpighiales</b>                       | 113      | 132  | 115      | 144  | 111      | 130  | 113      | 133  | 100      | 110  | 100       | 133  |
| 701*  | Stem- <i>Malpighia</i>                    | 44       | 51   | 35       | 53   | 44       | 51   | 45       | 51   | 44       | 51   | 44        | 51   |
| 753*  | Stem- <i>Salix</i> plus <i>Populus</i>    | 48       | 55   | 38       | 55   | 48       | 55   | 48       | 55   | 48       | 54   | 48        | 55   |
| 776*  | Stem-Clusiaceae                           | 88       | 107  | 88       | 117  | 88       | 105  | 88       | 107  | 85       | 93   | 85        | 107  |
| 796   | <b>Oxidales</b>                           | 100      | 134  | 105      | 144  | 99       | 132  | 100      | 134  | 86       | 110  | 86        | 134  |
| 809   | <b>Celastrales</b>                        | 89       | 123  | 93       | 133  | 88       | 122  | 89       | 123  | 78       | 104  | 78        | 123  |
| 825*  | <b>Fagales</b>                            | 86       | 108  | 86       | 123  | 86       | 108  | 86       | 108  | 85       | 98   | 85        | 108  |
| 830*  | Fagaceae                                  | 48       | 64   | 46       | 78   | 48       | 64   | 48       | 64   | 48       | 62   | 48        | 64   |
| 832   | <b>Cucurbitales</b>                       | 76       | 113  | 80       | 121  | 75       | 111  | 77       | 113  | 65       | 96   | 65        | 113  |
| 837   | <b>Rosales</b>                            | 92       | 122  | 97       | 132  | 91       | 120  | 91       | 122  | 81       | 104  | 81        | 122  |
| 847   | <b>Fabales</b>                            | 88       | 124  | 98       | 136  | 87       | 122  | 89       | 124  | 77       | 103  | 77        | 124  |
| 848*  | Stem- <i>Polygalaceae</i>                 | 79       | 116  | 90       | 128  | 78       | 114  | 80       | 117  | 69       | 96   | 69        | 117  |
| 855   | <b>Zygophyllales</b>                      | 50       | 112  | 52       | 118  | 49       | 111  | 49       | 112  | 43       | 95   | 43        | 112  |
| 862   | <b>Brassicales</b>                        | 81       | 107  | 84       | 115  | 78       | 104  | 81       | 107  | 69       | 90   | 69        | 107  |
| 869   | <b>Malvales</b>                           | 71       | 102  | 76       | 110  | 71       | 101  | 72       | 103  | 61       | 88   | 61        | 103  |
| 874   | <b>Huertales</b>                          | 28       | 96   | 30       | 103  | 28       | 94   | 29       | 97   | 23       | 81   | 23        | 97   |
| 875*  | <b>Sapindales</b>                         | 66       | 96   | 71       | 107  | 66       | 95   | 66       | 96   | 64       | 84   | 64        | 96   |
| 878*  | Stem- <i>Ailanthus</i> plus <i>Citrus</i> | 52       | 62   | 47       | 69   | 52       | 62   | 52       | 62   | 52       | 60   | 52        | 62   |
| 881   | <b>Crossosomatales</b>                    | 90       | 132  | 97       | 144  | 89       | 130  | 91       | 133  | 81       | 111  | 81        | 133  |
| 887*  | <b>Myrtales</b>                           | 84       | 114  | 89       | 130  | 84       | 112  | 85       | 115  | 83       | 99   | 83        | 115  |
| 895   | <b>Geraniales</b>                         | 14       | 48   | 8        | 50   | 12       | 52   | 7        | 60   | 9        | 41   | 9         | 60   |
| 897*  | <b>Vitales</b>                            | 63       | 80   | 58       | 105  | 63       | 80   | 62       | 80   | 62       | 79   | 62        | 80   |
| 898   | <b>Saxifragales</b>                       | 97       | 126  | 100      | 142  | 97       | 125  | 97       | 127  | 94       | 111  | 94        | 127  |
| 901*  | Saxifragales core                         | 87       | 113  | 89       | 128  | 88       | 112  | 88       | 114  | 86       | 100  | 86        | 114  |
| 914*  | Stem-Hamamelidaceae                       | 81       | 97   | 75       | 104  | 81       | 97   | 81       | 97   | 81       | 97   | 81        | 97   |
| 921   | Superasterids                             | 135      | 159  | 140      | 171  | 133      | 156  | 135      | 161  | 116      | 126  | 116       | 161  |
| 924   | Asterids                                  | 121      | 145  | 127      | 156  | 120      | 143  | 121      | 146  | 107      | 118  | 107       | 146  |
| 933   | <b>Dispacales</b>                         | 75       | 100  | 77       | 106  | 74       | 98   | 74       | 99   | 67       | 87   | 67        | 100  |
| 952*  | Stem-Dipelta                              | 34       | 40   | 13       | 36   | 34       | 40   | 34       | 40   | 34       | 40   | 34        | 40   |
| 962   | <b>Paracryphiales</b>                     | 50       | 100  | 52       | 105  | 49       | 99   | 49       | 99   | 43       | 88   | 43        | 100  |
| 964   | <b>Apiales</b>                            | 83       | 109  | 85       | 115  | 82       | 108  | 83       | 109  | 74       | 93   | 74        | 109  |
| 983*  | Araliaceae core                           | 37       | 42   | 21       | 38   | 37       | 42   | 37       | 42   | 37       | 42   | 37        | 42   |
| 993   | <b>Bruniales</b>                          | 76       | 111  | 78       | 117  | 75       | 110  | 76       | 112  | 67       | 95   | 67        | 112  |
| 996   | <b>Escalloniales</b>                      | 76       | 112  | 79       | 118  | 75       | 110  | 77       | 112  | 66       | 96   | 66        | 112  |
| 1002  | <b>Asterales</b>                          | 87       | 109  | 90       | 116  | 86       | 108  | 87       | 109  | 77       | 93   | 77        | 109  |
| 1009* | Stem-Asteraceae minus <i>Barnadesia</i>   | 45       | 67   | 51       | 74   | 45       | 66   | 45       | 67   | 42       | 58   | 42        | 67   |
| 1041  | <b>Aquifoliales</b>                       | 90       | 122  | 94       | 130  | 89       | 120  | 90       | 123  | 83       | 103  | 83        | 123  |
| 1047* | Stem- <i>Aquifoliaceae</i>                | 62       | 81   | 60       | 99   | 62       | 80   | 62       | 81   | 62       | 76   | 62        | 81   |
| 1054  | <b>Lamiales</b>                           | 76       | 101  | 81       | 108  | 75       | 100  | 76       | 101  | 67       | 86   | 67        | 101  |
| 1075* | <b>Solanales</b>                          | 75       | 105  | 81       | 111  | 75       | 105  | 77       | 105  | 66       | 88   | 66        | 105  |
| 1083  | <b>Gentianiales</b>                       | 65       | 97   | 70       | 103  | 64       | 96   | 65       | 97   | 57       | 81   | 57        | 93   |
| 1090  | <b>Boraginales</b>                        | 49       | 93   | 51       | 97   | 48       | 91   | 49       | 93   | 43       | 79   | 43        | 93   |
| 1093  | <b>Garryales</b>                          | 58       | 111  | 62       | 118  | 57       | 109  | 59       | 111  | 50       | 94   | 50        | 111  |
| 1094  | <b>Ericales</b>                           | 99       | 122  | 100      | 130  | 99       | 121  | 99       | 122  | 94       | 105  | 94        | 122  |
| 1098* | Ericales core                             | 85       | 98   | 83       | 103  | 85       | 98   | 85       | 98   | 85       | 93   | 85        | 98   |
| 1115* | <b>Cornales</b>                           | 85       | 115  | 84       | 134  | 85       | 115  | 85       | 116  | 86       | 105  | 86        | 116  |
| 1120  | <b>Caryophyllales</b>                     | 109      | 133  | 112      | 142  | 107      | 131  | 109      | 133  | 94       | 109  | 94        | 133  |
| 1162  | <b>Berberidopsidales</b>                  | 18       | 111  | 16       | 118  | 18       | 111  | 18       | 110  | 17       | 100  | 17        | 111  |
| 1163  | <b>Santanales</b>                         | 100      | 142  | 107      | 153  | 99       | 140  | 101      | 143  | 87       | 115  | 87        | 143  |
| 1168  | <b>Dilleniales</b>                        | 39       | 91   | 44       | 96   | 39       | 88   | 40       | 93   | 33       | 74   | 33        | 93   |
| 1170  | <b>Gunnerales</b>                         | 62       | 143  | 69       | 155  | 63       | 141  | 63       | 144  | 55       | 116  | 55        | 144  |
| 1171* | <b>Buxales</b>                            | 99       | 124  | 96       | 138  | 99       | 122  | 99       | 123  | 99       | 112  | 99        | 124  |
| 1173  | <b>Trochodendrales</b>                    | 3        | 29   | 4        | 30   | 3        | 28   | 3        | 28   | 2        | 24   | 2         | 29   |
| 1175* | <b>Proteales</b>                          | 108      | 151  | 110      | 173  | 108      | 148  | 107      | 150  | 108      | 125  | 107       | 151  |
| 1178  | <b>Sabiales</b>                           | 48       | 126  | 49       | 140  | 45       | 125  | 48       | 127  | 41       | 110  | 41        | 127  |
| 1179  | <b>Ranunculales</b>                       | 101      | 137  | 103      | 152  | 101      | 136  | 101      | 138  | 96       | 123  | 96        | 138  |

|       |                           |     |     |     |     |     |     |     |     |     |     |     |     |
|-------|---------------------------|-----|-----|-----|-----|-----|-----|-----|-----|-----|-----|-----|-----|
| 1182* | Stem-Menispermaceae       | 83  | 103 | 81  | 118 | 83  | 103 | 83  | 104 | 82  | 97  | 82  | 104 |
| 1193* | Monocots                  | 144 | 179 | 159 | 203 | 141 | 176 | 141 | 181 | 123 | 135 | 123 | 181 |
| 1200  | <b>Poales</b>             | 76  | 106 | 74  | 114 | 72  | 104 | 78  | 108 | 64  | 94  | 64  | 108 |
| 1208  | <b>Zingiberales</b>       | 75  | 89  | 71  | 93  | 75  | 88  | 75  | 89  | 74  | 84  | 74  | 89  |
| 1209* | Stem- <i>Musaceae</i>     | 74  | 84  | 68  | 87  | 74  | 84  | 74  | 84  | 74  | 81  | 74  | 84  |
| 1210  | <b>Commelinales</b>       | 62  | 99  | 62  | 106 | 55  | 98  | 58  | 100 | 52  | 90  | 52  | 100 |
| 1211* | <b>Arecales</b>           | 82  | 95  | 77  | 99  | 82  | 94  | 82  | 94  | 82  | 91  | 82  | 95  |
| 1212  | <b>Asparagales</b>        | 94  | 123 | 100 | 136 | 93  | 121 | 93  | 124 | 85  | 105 | 85  | 124 |
| 1221* | Orchidaceae               | 18  | 21  | 13  | 76  | 18  | 21  | 18  | 22  | 18  | 21  | 18  | 22  |
| 1222* | <b>Liliales</b>           | 66  | 115 | 75  | 129 | 65  | 113 | 65  | 115 | 58  | 98  | 58  | 115 |
| 1224* | Dioscoreales-Pandanales   | 91  | 131 | 105 | 152 | 90  | 128 | 90  | 131 | 89  | 108 | 89  | 131 |
| 1225  | <b>Pandanales</b>         | 45  | 99  | 48  | 113 | 44  | 97  | 45  | 99  | 38  | 86  | 38  | 99  |
| 1226* | <b>Alismatales</b>        | 105 | 143 | 125 | 172 | 105 | 140 | 104 | 143 | 98  | 116 | 98  | 143 |
| 1228* | <i>Alisma-Potamogeton</i> | 66  | 94  | 74  | 128 | 66  | 92  | 66  | 95  | 66  | 82  | 66  | 95  |
| 1232* | Araceae                   | 76  | 112 | 88  | 151 | 76  | 111 | 76  | 113 | 76  | 98  | 76  | 113 |
| 1235  | Magnoliidae               | 141 | 190 | 155 | 212 | 141 | 185 | 141 | 190 | 128 | 140 | 128 | 190 |
| 1237* | <b>Laurales</b>           | 107 | 134 | 107 | 153 | 107 | 132 | 107 | 133 | 107 | 121 | 107 | 134 |
| 1248* | <b>Magnoliales</b>        | 110 | 129 | 108 | 142 | 110 | 128 | 110 | 129 | 109 | 120 | 109 | 129 |
| 1256* | Stem-Canellales           | 128 | 179 | 143 | 203 | 127 | 174 | 128 | 179 | 117 | 134 | 117 | 179 |
| 1257  | <b>Piperales</b>          | 106 | 152 | 115 | 171 | 105 | 148 | 106 | 152 | 95  | 120 | 95  | 152 |
| 1260* | Stem- <i>Saururus</i>     | 44  | 63  | 43  | 84  | 44  | 63  | 44  | 63  | 44  | 59  | 44  | 63  |
| 1264  | <b>Canellales</b>         | 67  | 135 | 70  | 154 | 67  | 131 | 67  | 134 | 61  | 112 | 61  | 135 |
| 1268* | <b>Chloranthales</b>      | 92  | 113 | 88  | 126 | 92  | 113 | 92  | 113 | 92  | 107 | 92  | 113 |
| 1271  | <b>Austrobaileyales</b>   | 119 | 167 | 119 | 180 | 119 | 165 | 119 | 167 | 115 | 135 | 115 | 167 |
| 1272* | Stem-Schisandraceae       | 107 | 132 | 105 | 148 | 107 | 132 | 107 | 132 | 107 | 121 | 107 | 132 |
| 1273* | Stem- <i>Illicium</i>     | 85  | 103 | 80  | 112 | 85  | 104 | 85  | 103 | 85  | 101 | 85  | 104 |
| 1275  | <b>Nymphaeales</b>        | 128 | 189 | 129 | 198 | 128 | 185 | 129 | 188 | 119 | 140 | 119 | 189 |
| 1276* | Stem- <i>Cabombaceae</i>  | 110 | 128 | 107 | 138 | 110 | 128 | 110 | 128 | 109 | 119 | 109 | 128 |
| 1278* | Nymphaeaceae              | 93  | 116 | 91  | 126 | 93  | 116 | 93  | 116 | 94  | 111 | 93  | 116 |
| 1279* | Acrogymnosperms           | 308 | 357 | 307 | 342 | 308 | 355 | 307 | 351 | 307 | 345 | 307 | 357 |
| 1280* | Conifers                  | 274 | 327 | 254 | 318 | 271 | 325 | 264 | 322 | 265 | 321 | 265 | 327 |
| 1282* | Gnetales                  | 116 | 160 | 113 | 184 | 115 | 161 | 116 | 166 | 115 | 151 | 115 | 166 |
| 1284* | <i>Ginkgo-Cycas</i>       | 264 | 317 | 263 | 310 | 264 | 318 | 263 | 313 | 263 | 311 | 263 | 317 |
| 1286* | Ferns                     | 383 | 413 | 382 | 411 | 383 | 409 | 383 | 415 | 383 | 415 | 383 | 413 |
| 1287* | Lycophytes                | 390 | 430 | 395 | 452 | 391 | 432 | 389 | 443 | 390 | 444 | 389 | 443 |

Nodes are numbered as in Figure S2. The 52 calibrated nodes are represented by (\*) and nodes in bold characters represent major angiosperm orders. Posterior times are the 95% HPD CI, estimated using the HKY85+ $\Gamma_5$  substitution model, IR rate model, with the 83 genes subdivided into three partitions: (1) 1<sup>st</sup> and 2<sup>nd</sup> codon positions for plastid genes; (2) 1<sup>st</sup> and 2<sup>nd</sup> codon positions for mitochondrial genes; and (3) nuclear RNA genes. Composite: 95% high posterior density credibility interval (HPD CI) is a composite of the 95% HPD credibility intervals across all calibration strategies, except calibration strategy B (SB).

**Table S5. The 95% HPD limits of posterior divergence times, in millions of years before the present, for selected nodes in the vascular plant tree under different partition strategies, AR rate model, birth-death parameters and excluding lycophytes and ferns.**

| node  | Clade                                     | SA-IR-1P |     | SA-IR-MP |     | SA-AR-3P |     | SA-IR-3P-EP |     | SA-IR-3P-BD1 |     | SA-IR-3P-BD2 |     |
|-------|-------------------------------------------|----------|-----|----------|-----|----------|-----|-------------|-----|--------------|-----|--------------|-----|
| 645*  | Tracheophytes                             | 437      | 457 | 443      | 458 | 437      | 456 | N/A         | N/A | 444          | 460 | 443          | 458 |
| 646*  | Euphyllophytes                            | 418      | 452 | 430      | 454 | 422      | 451 | N/A         | N/A | 425          | 454 | 433          | 454 |
| 647*  | Spermatophytes                            | 341      | 375 | 355      | 389 | 344      | 371 | 355         | 391 | 354          | 393 | 354          | 418 |
| 648*  | Angiosperms                               | 223      | 263 | 213      | 261 | 230      | 265 | 231         | 271 | 214          | 263 | 217          | 257 |
| 651*  | Mesangiosperms                            | 184      | 222 | 177      | 211 | 189      | 216 | 186         | 223 | 178          | 214 | 180          | 211 |
| 655*  | Eudicots                                  | 164      | 196 | 159      | 187 | 166      | 188 | 166         | 198 | 160          | 190 | 161          | 188 |
| 661   | Superrosids                               | 143      | 167 | 140      | 160 | 138      | 154 | 145         | 170 | 139          | 163 | 140          | 160 |
| 662   | Rosids                                    | 141      | 165 | 138      | 158 | 137      | 153 | 143         | 169 | 138          | 161 | 139          | 158 |
| 668   | <b>Malpighiales</b>                       | 118      | 138 | 114      | 131 | 109      | 121 | 119         | 139 | 115          | 134 | 116          | 132 |
| 701*  | Stem- <i>Malpighia</i>                    | 45       | 53  | 44       | 52  | 44       | 50  | 44          | 52  | 44           | 51  | 44           | 52  |
| 753*  | Stem- <i>Salix</i> plus <i>Populus</i>    | 49       | 58  | 48       | 55  | 49       | 55  | 48          | 55  | 48           | 55  | 48           | 55  |
| 776*  | Stem-Clusiaceae                           | 91       | 115 | 89       | 107 | 85       | 93  | 91          | 112 | 89           | 108 | 89           | 107 |
| 796   | <b>Oxidales</b>                           | 104      | 140 | 105      | 135 | 116      | 130 | 106         | 142 | 102          | 135 | 101          | 134 |
| 809   | <b>Celastrales</b>                        | 95       | 131 | 90       | 123 | 100      | 116 | 95          | 130 | 91           | 124 | 91           | 124 |
| 825*  | <b>Fagales</b>                            | 86       | 111 | 86       | 109 | 94       | 115 | 86          | 112 | 86           | 109 | 86           | 108 |
| 830*  | Fagaceae                                  | 48       | 67  | 48       | 64  | 51       | 80  | 48          | 65  | 48           | 64  | 48           | 65  |
| 832   | <b>Cucurbitales</b>                       | 67       | 113 | 78       | 112 | 85       | 110 | 81          | 118 | 78           | 113 | 77           | 112 |
| 837   | <b>Rosales</b>                            | 91       | 125 | 91       | 120 | 100      | 118 | 96          | 128 | 92           | 123 | 93           | 121 |
| 847   | <b>Fabales</b>                            | 87       | 129 | 89       | 124 | 91       | 116 | 93          | 131 | 89           | 125 | 89           | 124 |
| 848*  | Stem- <i>Polygalaceae</i>                 | 79       | 123 | 80       | 117 | 86       | 112 | 84          | 124 | 80           | 117 | 81           | 117 |
| 855   | <b>Zygophyllales</b>                      | 48       | 124 | 50       | 111 | 66       | 111 | 53          | 117 | 49           | 112 | 50           | 112 |
| 862   | <b>Brassicales</b>                        | 76       | 110 | 82       | 107 | 78       | 100 | 85          | 112 | 82           | 108 | 82           | 107 |
| 869   | <b>Malvales</b>                           | 70       | 108 | 74       | 103 | 77       | 98  | 76          | 107 | 73           | 103 | 73           | 103 |
| 874   | <b>Huertales</b>                          | 29       | 103 | 31       | 98  | 54       | 101 | 29          | 100 | 30           | 97  | 29           | 97  |
| 875*  | <b>Sapindales</b>                         | 65       | 99  | 68       | 98  | 77       | 100 | 67          | 100 | 66           | 97  | 67           | 97  |
| 878*  | Stem- <i>Ailanthus</i> plus <i>Citrus</i> | 52       | 63  | 52       | 62  | 52       | 64  | 52          | 62  | 52           | 62  | 52           | 62  |
| 881   | <b>Crossosomatales</b>                    | 83       | 134 | 84       | 131 | 111      | 130 | 95          | 140 | 93           | 134 | 91           | 133 |
| 887*  | <b>Myrtales</b>                           | 84       | 117 | 86       | 116 | 84       | 104 | 87          | 123 | 85           | 116 | 85           | 113 |
| 895   | <b>Geraniales</b>                         | 85       | 134 | 12       | 58  | 110      | 130 | 10          | 80  | 22           | 41  | 14           | 61  |
| 897*  | <b>Vitales</b>                            | 62       | 84  | 63       | 81  | 63       | 100 | 62          | 81  | 62           | 81  | 62           | 81  |
| 898   | <b>Saxifragales</b>                       | 101      | 137 | 96       | 126 | 108      | 134 | 99          | 132 | 97           | 127 | 97           | 127 |
| 901*  | Saxifragales core                         | 88       | 119 | 87       | 114 | 94       | 122 | 89          | 119 | 88           | 114 | 87           | 114 |
| 914*  | Stem-Hamamelidaceae                       | 81       | 101 | 81       | 94  | 89       | 118 | 81          | 98  | 81           | 97  | 81           | 97  |
| 921   | Superasterids                             | 141      | 166 | 138      | 159 | 138      | 155 | 143         | 169 | 138          | 161 | 139          | 158 |
| 924   | Asterids                                  | 127      | 151 | 123      | 144 | 126      | 141 | 128         | 153 | 124          | 146 | 124          | 144 |
| 933   | <b>Dispacales</b>                         | 84       | 111 | 76       | 100 | 95       | 111 | 79          | 105 | 75           | 100 | 76           | 100 |
| 952*  | Stem-Dipelta                              | 34       | 42  | 34       | 40  | 34       | 41  | 33          | 40  | 34           | 40  | 34           | 41  |
| 962   | <b>Paracryphiales</b>                     | 38       | 106 | 45       | 97  | 84       | 110 | 51          | 104 | 49           | 100 | 50           | 100 |
| 964   | <b>Apiales</b>                            | 89       | 117 | 85       | 110 | 101      | 115 | 87          | 114 | 84           | 110 | 84           | 108 |
| 983*  | Araliaceae core                           | 37       | 44  | 37       | 43  | 38       | 59  | 37          | 42  | 37           | 42  | 37           | 42  |
| 993   | <b>Bruniales</b>                          | 77       | 121 | 74       | 111 | 99       | 117 | 79          | 116 | 77           | 112 | 77           | 110 |
| 996   | <b>Escalloniales</b>                      | 74       | 120 | 79       | 112 | 103      | 118 | 81          | 117 | 78           | 113 | 77           | 111 |
| 1002  | <b>Asterales</b>                          | 97       | 122 | 89       | 109 | 92       | 108 | 91          | 114 | 89           | 109 | 89           | 109 |
| 1009* | Stem-Asteraceae minus <i>Barnadesia</i>   | 47       | 77  | 46       | 68  | 53       | 72  | 47          | 71  | 46           | 68  | 46           | 67  |
| 1041  | <b>Aquifoliales</b>                       | 91       | 129 | 90       | 121 | 109      | 126 | 94          | 129 | 92           | 123 | 91           | 121 |
| 1047* | Stem- <i>Aquifoliaceae</i>                | 61       | 83  | 62       | 81  | 66       | 105 | 62          | 83  | 62           | 81  | 62           | 81  |
| 1054  | <b>Lamiales</b>                           | 82       | 109 | 76       | 100 | 86       | 102 | 81          | 107 | 78           | 103 | 77           | 100 |
| 1075* | <b>Solanales</b>                          | 78       | 112 | 77       | 104 | 93       | 109 | 80          | 111 | 79           | 108 | 78           | 105 |
| 1083  | <b>Gentianiales</b>                       | 69       | 103 | 65       | 96  | 79       | 99  | 69          | 102 | 67           | 99  | 66           | 96  |
| 1090  | <b>Boraginales</b>                        | 37       | 95  | 48       | 90  | 77       | 98  | 51          | 96  | 50           | 94  | 49           | 92  |
| 1093  | <b>Garryales</b>                          | 45       | 110 | 55       | 107 | 91       | 118 | 62          | 116 | 59           | 112 | 59           | 111 |
| 1094  | <b>Ericales</b>                           | 103      | 130 | 100      | 123 | 101      | 118 | 102         | 128 | 100          | 123 | 99           | 122 |
| 1098* | Ericales core                             | 85       | 104 | 85       | 99  | 86       | 101 | 85          | 100 | 85           | 98  | 85           | 98  |
| 1115* | <b>Cornales</b>                           | 86       | 125 | 85       | 114 | 107      | 133 | 85          | 119 | 85           | 118 | 85           | 117 |
| 1120  | <b>Caryophyllales</b>                     | 116      | 143 | 112      | 134 | 106      | 122 | 114         | 139 | 110          | 134 | 111          | 134 |
| 1162  | <b>Berberidopsidales</b>                  | 18       | 105 | 18       | 94  | 64       | 138 | 18          | 112 | 18           | 111 | 18           | 109 |
| 1163  | <b>Santanales</b>                         | 93       | 145 | 103      | 145 | 117      | 142 | 107         | 151 | 103          | 144 | 103          | 143 |
| 1168  | <b>Dilleniales</b>                        | 36       | 109 | 36       | 85  | 37       | 88  | 42          | 95  | 38           | 92  | 39           | 92  |
| 1170  | <b>Gunnerales</b>                         | 66       | 162 | 72       | 150 | 104      | 147 | 66          | 151 | 63           | 146 | 61           | 145 |
| 1171* | <b>Buxales</b>                            | 99       | 131 | 99       | 124 | 102      | 144 | 99          | 127 | 99           | 125 | 99           | 124 |
| 1173  | <b>Trochodendrales</b>                    | 5        | 55  | 4        | 30  | 18       | 73  | 4           | 31  | 3            | 29  | 3            | 28  |
| 1175* | <b>Proteales</b>                          | 108      | 156 | 108      | 148 | 150      | 176 | 108         | 159 | 108          | 152 | 108          | 151 |
| 1178  | <b>Sabiales</b>                           | 37       | 133 | 47       | 125 | 91       | 154 | 48          | 134 | 48           | 129 | 46           | 129 |
| 1179  | <b>Ranunculales</b>                       | 105      | 157 | 102      | 141 | 107      | 156 | 103         | 142 | 101          | 138 | 101          | 139 |
| 1182* | Stem-Menispermaceae                       | 83       | 108 | 83       | 106 | 83       | 118 | 83          | 106 | 82           | 103 | 83           | 103 |
| 1193* | Monocots                                  | 141      | 184 | 146      | 179 | 154      | 182 | 150         | 193 | 146          | 182 | 149          | 182 |
| 1200  | <b>Poales</b>                             | 76       | 108 | 74       | 105 | 84       | 101 | 79          | 113 | 82           | 108 | 69           | 104 |
| 1208  | <b>Zingiberales</b>                       | 75       | 90  | 75       | 87  | 75       | 86  | 75          | 91  | 75           | 90  | 75           | 89  |

|       |                           |     |     |     |     |     |     |     |     |     |     |     |     |
|-------|---------------------------|-----|-----|-----|-----|-----|-----|-----|-----|-----|-----|-----|-----|
| 1209* | <i>Stem-Musaceae</i>      | 74  | 86  | 74  | 84  | 74  | 83  | 74  | 85  | 74  | 85  | 74  | 84  |
| 1210  | <b>Commelinales</b>       | 47  | 96  | 52  | 96  | 80  | 99  | 57  | 103 | 62  | 99  | 61  | 99  |
| 1211* | <b>Arecales</b>           | 82  | 96  | 82  | 95  | 82  | 90  | 82  | 96  | 82  | 95  | 82  | 95  |
| 1212  | <b>Asparagales</b>        | 90  | 124 | 92  | 122 | 105 | 120 | 99  | 130 | 95  | 124 | 94  | 123 |
| 1221* | Orchidaceae               | 18  | 23  | 18  | 21  | 18  | 21  | 18  | 22  | 18  | 22  | 18  | 21  |
| 1222* | <b>Liliales</b>           | 51  | 120 | 66  | 114 | 88  | 115 | 69  | 122 | 67  | 117 | 66  | 114 |
| 1224* | Dioscoreales-Pandanales   | 87  | 132 | 89  | 126 | 109 | 130 | 92  | 139 | 90  | 132 | 92  | 131 |
| 1225  | <b>Pandanales</b>         | 33  | 101 | 45  | 98  | 72  | 109 | 47  | 104 | 44  | 99  | 45  | 99  |
| 1226* | <b>Alismatales</b>        | 101 | 140 | 105 | 141 | 121 | 147 | 109 | 154 | 106 | 145 | 106 | 144 |
| 1228* | <i>Alisma-Potamogeton</i> | 66  | 91  | 66  | 95  | 66  | 83  | 67  | 105 | 67  | 96  | 67  | 96  |
| 1232* | Araceae                   | 76  | 108 | 76  | 114 | 91  | 130 | 76  | 122 | 76  | 114 | 76  | 115 |
| 1235  | Magnoliidae               | 135 | 188 | 140 | 183 | 179 | 207 | 147 | 201 | 144 | 192 | 144 | 195 |
| 1237* | <b>Laurales</b>           | 108 | 136 | 108 | 133 | 123 | 162 | 108 | 138 | 108 | 135 | 108 | 134 |
| 1248* | <b>Magnoliales</b>        | 110 | 134 | 110 | 128 | 117 | 157 | 110 | 133 | 110 | 130 | 110 | 129 |
| 1256* | Stem-Canellales           | 118 | 169 | 127 | 170 | 169 | 201 | 134 | 190 | 130 | 180 | 130 | 186 |
| 1257  | <b>Piperales</b>          | 96  | 142 | 108 | 148 | 113 | 169 | 111 | 160 | 108 | 154 | 108 | 156 |
| 1260* | Stem- <i>Saururus</i>     | 44  | 61  | 44  | 62  | 44  | 72  | 44  | 65  | 44  | 63  | 44  | 64  |
| 1264  | <b>Canellales</b>         | 70  | 137 | 68  | 131 | 124 | 179 | 70  | 140 | 68  | 136 | 68  | 136 |
| 1268* | <b>Chloranthales</b>      | 92  | 121 | 92  | 114 | 93  | 144 | 92  | 114 | 92  | 114 | 92  | 113 |
| 1271  | <b>Austrobaileyales</b>   | 115 | 175 | 119 | 168 | 132 | 192 | 120 | 174 | 119 | 170 | 119 | 169 |
| 1272* | Stem-Schisandraceae       | 107 | 135 | 107 | 133 | 109 | 153 | 107 | 135 | 107 | 134 | 107 | 133 |
| 1273* | Stem- <i>Illicium</i>     | 85  | 107 | 85  | 103 | 85  | 114 | 85  | 103 | 85  | 104 | 85  | 103 |
| 1275  | <b>Nymphaeales</b>        | 124 | 197 | 125 | 185 | 145 | 208 | 132 | 202 | 130 | 193 | 129 | 196 |
| 1276* | Stem- <i>Cabombaceae</i>  | 110 | 135 | 110 | 128 | 110 | 137 | 110 | 130 | 110 | 129 | 110 | 129 |
| 1278* | Nymphaeaceae              | 93  | 116 | 93  | 116 | 94  | 124 | 93  | 118 | 93  | 116 | 93  | 116 |
| 1279* | Acrogymnosperms           | 307 | 346 | 307 | 345 | 306 | 326 | 310 | 362 | 307 | 343 | 308 | 355 |
| 1280* | Conifers                  | 217 | 314 | 265 | 323 | 262 | 309 | 278 | 328 | 268 | 320 | 267 | 328 |
| 1282* | Gnetales                  | 116 | 169 | 117 | 164 | 116 | 170 | 116 | 161 | 117 | 156 | 115 | 153 |
| 1284* | <i>Ginkgo-Cycas</i>       | 263 | 313 | 263 | 305 | 273 | 315 | 264 | 319 | 263 | 312 | 263 | 311 |
| 1286* | Ferns                     | 383 | 411 | 383 | 410 | 383 | 405 | N/A | N/A | 383 | 398 | 384 | 413 |
| 1287* | Lycophytes                | 391 | 423 | 390 | 445 | 392 | 441 | N/A | N/A | 392 | 447 | 390 | 428 |

Nodes are numbered as in Figure S2. The 52 calibrated nodes are represented by (\*) and nodes in bold characters represent major angiosperm orders. Posterior times are the 95% HPD CI, estimated using the HKY85+ $\Gamma_5$  substitution model, and calibration strategy A (SA). 1P, the tree partitions analysed as a single partition; MP, mixed partitions of plastid proteins, mitochondrial proteins and nuclear RNA genes; IR, independent rates model; AR autocorrelated rates model and birth-death parameters adjusted to generate a tree with long internal branches and short tip branches (BD1) and large node ages with nodes close to the root (BD2). N/A: not applicable.

## NOTES S1 – Justification of fossil calibrations

### Node 645 | CG Tracheophyta | MRCA: Lycophyta-Euphyllophyta | 422 Ma – 451 Ma.

**Fossil taxon and specimen.** Clarke et al. [1] based their calibration of this node on *Zosterophyllum* sp. [US384-8137; University of Saskatchewan Collec but more accurate timescale but more accurate timescale tions, Canada] from Bathurst Island [2].

**Phylogenetic justification.** Following Clarke et al. (2011), the *Zosterophyllum* sp. from Bathurst Island (Kotyk et al. 2002) is unequivocally zosterophyll given its possession of reniform sporangia, sporangia that dehisce along their distal margins, and laterally inserted sporangia. All *Zosterophyllum* species are total group Lycopsidea [3].

**Minimum age.** 422 Ma.

**Maximum age.** 451 Ma.

**Age justification.** *Zosterophyllum* sp. on Bathurst Island [2] co-occurs with conodont *Ozarkodina douroensis*, which is restricted to the Ludlow (as O. n. sp. B in [4-7]). Thus, a minimum age interpretation can be derived from the top of the Ludlow, dated to 423.0 Ma  $\pm$  1.0 Myr, thus 422.0 Ma. The soft maximum constraint, following Clarke et al. [1], is based on the oldest occurrences of trilete spores, known from the Qusaiba-1 core from the Quasim Formation of northern Saudi Arabia [8]. Thus, we establish our soft maximum for Tracheophyta at 451 Ma. The very oldest records precede the earliest occurrences of the *Acanthochitina barbata*, opening the possibility that they occur in the preceding *Tanuchitina fistulosa* biozone, though *T. fistulosa* does not occur. The oldest stratigraphic records within the core co-occur with the chitinozoan *Armoricochitina nigerica*, known to extend into the Caradoc, to within the biozone characterized by *Fungochitina spinifera* (= *Fungochitina fungiformis*) [9]. The base of the *F. spinifera* zone falls within the *Dicranograptus clingani* Biozone (*Dicellograptus morrisoni* subzone) [10], the base of which is estimated at 451 Ma [11].

### Node 646 | CG Euphyllophytes | MRCA: Ferns-Spermatophyta | 385.571 Ma – 451 Ma.

**Fossil taxon and specimen.** *Rellimia thomsonii* from the Panther Mountain Formation of New York [12] [335.34; Paleobotanical Collection of the State University of New York at Bingham].

**Phylogenetic justification.** Magallón et al. [13] identified *Ibyka amphikoma* [14] as the oldest record of the pteridophyte lineage based on phylogenetic analyses undertaken by Kenrick and Crane [3].

**Minimum age.** 384.71 Ma.

**Maximum age.** 451 Ma.

**Age justification.** Clarke et al. [1] proposed *Rellimia thomsonii*, an aneurophytalean progymnosperm from the Panther Mountain Formation of New York [12], as the oldest record of crown Euphyllophyta. The Panther Mountain Formation is equivalent to the Ludlowville and Skaneateles formations [1], which occur below the Moscow Formation of New York [15], making *Rellimia thomsonii* older than *Ibyka amphikoma* [1]. The Ludlowville-Moscow formation boundary falls deep within the Lower *varcus* zone [16] and, therefore, below the *rhenanus-ansatus* biozonal boundary [17], at the very least, which has been dated to 386.25 Ma  $\pm$  0.679 Myr, yielding a minimum constraint of 385.571 Ma. The soft maximum constraint, following Clarke et al. [1], is based on the oldest occurrences of trilete spores, known from the Qusaiba-1 core from the Quasim Formation of northern Saudi Arabia [8]. The very oldest records precede the earliest occurrences of the *Acanthochitina barbata*, opening the possibility that they occur in the preceding *Tanuchitina fistulosa* biozone, though *T. fistulosa* does not occur. The oldest stratigraphic records within the core co-occur with the chitinozoan *Armoricochitina nigerica*, known to extend into the Caradoc, to within the biozone characterized by *Fungochitina spinifera* (= *Fungochitina fungiformis*) [9]. The base of the *F. spinifera* zone falls within the *Dicranograptus clingani* Biozone (*Dicellograptus morrisoni* Subzone) [10] et al. ,2008) [11], the base of which is estimated at 451 Ma (Cooper and Saddler 2012). Thus, we establish our soft maximum for Tracheophyta at 451 Ma.

**Discussion.** Magallón et al. [13] established a minimum age constraint using *Ibyka amphikoma*, based on the Givetian-Frasnian boundary, for which they provided a date of 385 Ma, though this has since been revised to 382.7 Ma  $\pm$  1 Myr [17]. *Ibyka amphikoma* was recovered from the Manorkill Shale Member, which is a lateral equivalent of the Windom Member, within the Moscow Formation of New York [18, 19], which falls fully within the *ansatus* conodont Biozone [20, 21] the top of which is dated to 385.41 Ma  $\pm$  0.7 Myr [17], thus, yielding a minimum age constraint of 384.71 Ma, younger than the minimum age of *Rellimia thomsonii*.

### Node 647 | CG Spermatophytes | MRCA: *Ginkgo-Austrobuxus* | 308.14 Ma – 365.629 Ma.

**Fossil taxon and specimen.** *Cordaites iowensis* [UIC 12,233; University of Illinois at Chicago; OUPH 9616-9742; Ohio University Paleobotanical Herbarium, Department of Botany, Ohio University, Athens, Ohio] from the Laddsdales Coals (Cherokee Group, Desmoinesian) near What Cheer, Iowa [22].



**Phylogenetic justification.** Clarke *et al.* [1] identify cordaitan coniferophytes as the oldest records of the crown group of the spermatophyte clade. The oldest whole plant reconstruction is *Cordaites iowensis* from the Laddsdale Coals (Cherokee Group, Desmoinesian) near What Cheer, Iowa [22].

**Minimum age.** 308.14 Ma.

**Maximum age.** 365.629 Ma.

**Age justification.** Janousek and Pope [23] argue that the Laddsdale Coal is equivalent to the Bluejacket Coal of Oklahoma, which occurs as part of the Bluejacket Sandstone Member, underlying the Inola Limestone, part of the Inola Cyclothem of the Krebs subgroup of the Cherokee Group, characterized by the occurrence of the conodonts *Idiognathodus amplificus*, *Idiognathodus podolskensis* and *Neognathodus asymmetricus* [24]. The Inola cyclothem falls fully within the *Idiognathodus amplificus/Idiognathodus obliquus* biozone [25]. This is indicative of the *Neognathodus medexultimus-Streptognathodus concinnus* (Pc10) biozone, certainly older than the *Neognathodus roundyi – Streptognathodus cancellosus* (Pc11) biozone [25, 26]. The base of Pc10 is bracketed by an older age constraint of 312.01 Ma  $\pm$  0.37 Myr and the base of Pc11 is bracketed by a younger age constraint of 308.5 Ma  $\pm$  0.36 Myr in the Composite Standard of Davydov *et al.* [26], yielding a minimum constraint of 308.14 Ma.

The soft maximum constraint follows Clarke *et al.* [1] who based theirs on the first records of seeds in the form of preovules that satisfy the criteria of the seed habit, which occur in the Upper Fammenian (Late Devonian) VCo Spore Biozone [27], a well documented example of which being *Elkinsia polymorpha* [28]; *E. polymorpha* has been recovered from the Hampshire Formation, West Virginia, from which the palynomorphs *Grandispora cornuta*, *Retispora macroreticulata*, *Retusotriletes phillipsii* and *Rugospora radiata* have been reported [29], which substantiate assignment to the VCo Biozone [30]. The VCo biozone is not directly dated but its base falls within the *Palmatolepis trachytera* conodont biozone [31], the base of which is dated to 364.19 Ma  $\pm$  1.439 Myr [17], yielding a soft maximum constraint on the divergence of crown Spermatophyta at 365.629 Ma.

**Node 648 | CG Angiosperms | MRCA: *Amborella-Austrobuxus* | 125.9 Ma – 247.3 Ma.**

**Fossil taxon and specimen.** Tricolpate pollen grain [BRN 126] from the Cowleaze Chine Member of the Vectis Formation of the Isle of Wight [32].

**Phylogenetic justification.** Following Clarke *et al.* [1], our minimum age constraint is based on the earliest occurrences Fischer's rule tricolpate pollen, and knowledge of the distribution of tricolpate pollen across the phylogeny of angiosperms [33].

**Minimum age.** 125.9 Ma.

**Maximum age.** 247.3 Ma.

**Age justification.** Following Clarke *et al.* [1], the Cowleaze Chine Member of the Vectis Formation of the Isle of Wight (Hughes & McDougall, 1990) occurs within the M1n polarity chron at the top of the Barremian, dated as 126.3 Ma  $\pm$  0.4 Myr [34]. The soft maximum age constraint is based on sediments devoid of angiosperm-like pollen below their first report in the Middle Triassic, thus, the base of the Anisian, dated to 247.1 Ma  $\pm$  0.2 Myr [35], thus, 247.3 Ma.

**Discussion.** The recently described *Euanthus panii* [36], *Juraherba bodae* [37] and *Yuhania dahugouensis* [38] from the Jiulongshan Formation were considered but not assigned. At the current stage, the age of the formation appears to be still not fully settled despite most experts agree on a middle Jurassic age (see [37, 38]), whereas the assignment to extant lineages also required further investigation using phylogenetic approaches to confirm the proposed relationships of *Juraherba* to Hydatellaceae - which are the sister to the remaining Nymphaeales lineage (node 1276) and *Yuhania* to monocots.

**Node 651 | CG Mesangiosperms | MRCA: *Chloranthus-Austrobuxus* | 125.9 Ma – 247.3 Ma.**

**Fossil taxon and specimen.** Tricolpate pollen grain [BRN 126] from the Cowleaze Chine Member of the Vectis Formation of the Isle of Wight. [32].

**Phylogenetic justification.** Following Clarke *et al.* [1], our minimum age constraint is based on the earliest occurrences Fischer's rule tricolpate pollen, and knowledge of the distribution of tricolpate pollen across the phylogeny of angiosperms [33].

**Minimum age.** 125.9 Ma.

**Maximum age.** 247.3 Ma.

**Age justification.** Following Clarke *et al.* [1], the Cowleaze Chine Member of the Vectis Formation of the Isle of Wight [32] occurs within the M1n polarity chron at the top of the Barremian, dated as 126.3 Ma  $\pm$  0.4 Myr [34]. The soft maximum age constraint is based on sediments devoid of angiosperm-like pollen below their first report in the Middle Triassic, thus, the base of the Anisian, dated to 247.1 Ma  $\pm$  0.2 Myr [35], thus, 247.3 Ma.



**Node 655 | CG Eudicots | MRCA: *Dicentra-Austrobuxus* | 119.6 Ma.**

**Fossil taxon and specimen.** *Hyrantha decussata* [NJU-DES02001: Geological Institute, Chinese Academy of Sciences, Beijing], from the lower part of the Yixian Formation, Jehol Group, Liaoning Province, China [39].

**Phylogenetic justification.** Similar to *Leeffrutcus* from the Yixian formation of the Lower Cretaceous of China, *Hyrantha* is considered to be a stem group representative of the Ranunculales [40].

**Minimum age.** 119.6 Ma.

**Age justification.** The main fossil bearing beds have been dated and may be as old as 129.2 Ma [41], however, in the absence of knowledge of the position of the fossils within the stratigraphy, relative to the sources of the absolute dates, a minimum age constraint can be derived from the Jiufontang Formation which overlies it.

<sup>40</sup>Ar/<sup>39</sup>Ar dating of a number of samples from the Jiufontang Formation has yielded an age of 120.3 ± 0.7 Ma for the volcanic tuffs [42], establishing a minimum constraint of 119.6 Ma.

**Node 701 | SG Malpighia | MRCA: *Dicella-Malpighia* | 44.83 Ma.**

**Fossil taxon and specimen.** *Perisyncolporites pokornyi* [UFP65: Paleobotanical Collection of the Florida Museum of Natural History, University of Florida: Gainesville, Florida, USA] from central Colombia [43].

**Phylogenetic justification.** Assigned to Malpighiales [43, 44]. Based on morphological similarities, the fossils are considered as reliable assigned to the stem of the stigmaphyllid clade [45].

**Minimum age.** 44.83 Ma.

**Age justification.** The minimum age of *Perisyncolporites pokornyi* is best constrained in sections in central Colombia which Jaramillo and Dilcher [43] integrated into a graphic correlation composite standard and, on this basis, were able to establish its first occurrence as within the Lower Eocene. This composite standard has been refined and calibrated to absolute time by Jaramillo et al. [46] who provide a date of 44.83 Ma for the first appearance of *Perisyncolporites pokornyi*.

**Node 753 | SG *Salix* plus *Populus* | MRCA: *Idesia-Salix* | 48.57 Ma.**

**Fossil taxon and specimen.** *Pseudosalix handleyi* [UMNH PB-1: Utah Museum of Natural History, Salt Lake City, USA] from lacustrine shales of the Parachute Creek Member of the Green River Formation in the vicinity of Bonanza, Utah, USA [47].

**Phylogenetic justification.** Our node assignment follows the currently accepted interpretation of the fossil record of Salicaceae [48].

**Minimum age.** 48.57 Ma.

**Age justification.** The Parachute Creek Member reaches into C22n magnetozone [49], the minimum age of which can be established from the base of the succeeding C21r, dated to 48.57 Ma in the combined age model of Vandenberghe et al. [50].

**Node 776 | SG Clusiaceae | MRCA: *Clusia-Hypericum* | 85.8 Ma.**

**Fossil taxon and specimen.** *Paleoclusia chevalieri* [CUPC 1192: L. H. Bailey Hortorium Paleobotanical Collection, Cornell University, Ithaca, NY, USA] from the Old Crossman locality, New Jersey, USA [51].

**Phylogenetic justification.** The phylogenetic interpretation follows Ruhfels [52].

**Minimum age.** 85.8 Ma.

**Age justification.** Clarke et al. [1] argued that a minimum constraint on the age of this deposit could be established from Santonian-Campanian Boundary, however, Massoni et al. [53] argue that a tighter correlation can be established with better rocks attributable to the CC13-14 Nannofossil zones in South Carolina, indicating a minimum age of 86.3 Ma ± 0.5 Myr, thus, 85.8 Ma.

**Node 825 | CG Fagales | MRCA: *Nothofagus-Fagus* | 85.8 Ma.**

**Fossil taxon and specimen.** *Nothofagidites senectus* [GSV 61898: Mines Department of Victoria, Melbourne, Australia] from the Bass and Gippsland Basins, Australia [54]

**Phylogenetic justification.** These microfossils are widely considered to be Nothofagaceae which in turn are the sister to the remaining Fagales clade [55].

**Minimum age.** 85.8 Ma.

**Age justification.** The first appearance of *Nothofagidites senectus* defines the base of the *Nothofagidites senectus* Palynozone, which coincides with the Coniacian-Santonian Boundary, which is dated to 86.3 Ma ± 0.5 Myr [34], affording a minimum age constraint of 85.8 Ma.

**Node 830 | CG Fagaceae | *Fagus-Quercus* | 47.6 Ma.**

**Fossil taxon and specimen.** *Fagus langevinii* [UWBM 97583: Burke Museum, Seattle, Washington, USA] preserved as impressions and carbonaceous films in a siliceous shale in an unnamed formation within the Kamloops Group at the McAbee Locality near the town of Cache Creek, British Columbia [57].

**Phylogenetic justification.** This fossil is accepted as a stem group representative of the genus *Fagus* [58].

**Minimum age.** 47.6 Ma.

**Age justification.** Ashes within the 30 metre sequence of fossiliferous shales have yielded dates based on K-Ar geochronology, ranging between 52 Ma  $\pm$  2 Myr and 49 Ma  $\pm$  2 Myr [59]. Correlation based on facies and pollen biostratigraphy establish an Ypresian age for the fossil assemblage, compatible with the aged from the intercalated ashes. Therefore, a minimum age constraint can be established on the Ypresian-Lutetian Boundary which has been dated to 47.8 Ma  $\pm$  0.2 Myr based on the combined age model of Vandenberghe et al. [50], thus, 47.6 Ma.

**Node 848 | SG Polygalaceae | MRCA: *Polygala-Medicago* | 61.6 Ma.**

**Fossil taxon and specimen.** *Paleosecuridaca curisii* [PP34562: Field Museum, Chicago, IL, USA], described by from the Sentinel Butte Formation at the Almont site in Morton County, central North Dakota [62].

**Phylogenetic justification.** The phylogenetic relationships were clarified by Pigg [61].

**Minimum age.** 61.6 Ma.

**Age justification.** The age of the Sentinel Butte Formation has been assigned to the Tiffanian 3 based on mollusk and mammal-based biostratigraphy, but the most concrete age evidence is based on palynostratigraphy, assigned the Almont Site sediments of the Sentinel Butte Formation to Pollen Zone 5 of the late Palaeocene [63]. In the absence of further constraint we establish a minimum age for *Paleosecuridaca curisii* based on the Palaeocene-Eocene boundary, dated to 61.6 Ma in the combined age model of Vandenberghe et al. [50].

**Node 875 | CG Sapindales | MRCA: *Citrus-Nitraria* | 59.24 Ma.**

**Fossil taxon and specimen.** *Dipteronia brownii* [UF 15740E-23086: Florida Museum of Natural History, Gainesville FL, USA] from the Paleocene Fort Union Formation at Hell's Half Acre, Wyoming [64].

**Phylogenetic justification.** This fossil is assigned to the extant genus *Dipteronia* which belongs to the subfamily Hippocantanoideae of the family Sapindaceae. The extant genus is considered a Tertiary relict having two extant species endemic to China [65, 66]. Being a possible stem group representative of the extant genus nested in the Sapindales provided the framework for this assignment.

**Minimum age.** 59.24 Ma.

**Age justification.** *Dipteronia brownii* occurs within the P4 Pollen Zone in the type section of Nichols and Ott [67], which falls fully within Magnetic Anomaly Zone C26r [68], the end of which is dated to 59.24 Ma in the combined age model of Vandenberghe et al. [50].

**Node 878 | SG Ailanthus plus *Citrus* | MRCA: *Ailanthus-Swietenia* | 51.83 Ma.**

**Fossil taxon and specimen.** *Ailanthus confucii* (senior synonym of *Ailanthus lesquereuxi*) [DMNH 7879: Denver Museum of Natural History, Denver CO, USA] from the Fossil Butte fish quarries of the Green River Formation near Kemerrer, Wyoming [69].

**Phylogenetic justification.** This fossil is accepted to belong to the extant genus *Ailanthus* and can be therefore assigned to this clade [69].

**Minimum age.** 51.83 Ma.

**Age justification.** The Fossil Butte Member of the Green River Formation is bounded minimally by the C23r magnetozone [49], the minimum age of which can be established from the base of the succeeding C23n, dated to 51.83 Ma in the combined age model of Vandenberghe et al. [50].

**Node 887 | CG Myrtales | MRCA: *Myrtus-Oenothera* | 83.3 Ma.**

**Fossil taxon and specimen.** *Esqueiria futabensis* [PP45419: Field Museum, Chicago IL, USA] from two levels in the Futaba Group exposed in Fukushima Prefecture, northeastern Honshu, Japan [70].

**Phylogenetic justification.** The phylogenetic relationships have been established by several authors [71].

**Minimum age.** 83.3 Ma.

**Age justification.** One locality, considered Coniacian, occurs in the Asamigawa Member of the Ashizawa Formation, on a tributary of the Kitaba River in Kamikitaba, Hirono-machi. Unfortunately, no material evidence has been presented to substantiate this age assignment (Takahashi et al. [70], among others, merely cite the presence of unspecified Coniacian ammonites). The second locality is in the middle part of the Tamayama Formation, on the Kohisa River, Kohisa, Ouhisa machi, northeast of Iwaki City. The Asamigawa Formation is the lowermost formation in the Futaba Group, and is overlain by the Kasamatsu Formation, in turn overlain by the Tamayama Formation. The age of the Tamayama Formation is substantiated on the presence of *Inoceramus amakusensis* [70], which is restricted to the Santonian [72]. Thus, a minimum age constraint may be established on the Santonian-Campanian Boundary, dated as 83.6 Ma  $\pm$  0.3 Myr [34], thus, 83.3 Ma.

**Node 897 | CG Vitales | MRCA: *Vitis-Leea* | 65.508 Ma.**

**Fossil taxon and specimen.** *Indovitis chitaleyae* [UF19279-56220: Florida Museum of Natural History (UF) Gainesville, Florida, USA] preserved as fruits and seeds in chert from Deccan Intertrappean beds exposed in a

quarry near the village of Mahurzari, India about 14 km from Nagpur, along with young fruits with intact seeds and isolated mature seeds from a series of localities including Mohgaonkalan in Chhindwara District and Ambabagholi in Baitul District, both in Madhya Pradesh, and Shibla in Yeotmal District, Maharashtra [73].

**Phylogenetic justification.** The phylogenetic relationships of this fossil have been clarified previously [73].

**Minimum age.** 65.508 Ma

**Age justification.** A minimum constraint on the age of *Indovitis chitaleyae* can be established on minimum age of Deccan volcanism, which has been constrained to 65.535 Ma  $\pm$  0.027 Myr [74], thus, 65.508 Ma.

**Node 901 | CG Saxifragales core | MRCA: *Haloragis-Itea* | 85.8 Ma.**

**Fossil taxon and specimen.** *Divisestylus brevistamineus* [CUPC 1340: L. H. Bailey Hortorium Paleobotanical Collection, Cornell University, Ithaca NY, USA], flowers described from the Old Crossman locality, New Jersey, USA [75].

**Phylogenetic justification.** The phylogenetic relationships of this fossil have been clarified previously [75].

**Minimum age.** 85.8 Ma

**Age justification.** Clarke et al. [1] argued that a minimum constraint on the age of this deposit could be established from Santonian-Campanian Boundary, however, Massoni et al. [53] argue that a tighter correlation can be established with better rocks attributable to the CC13-14 Nannofossil zones in South Carolina, indicating a minimum age of 86.3 Ma  $\pm$  0.5 Myr, thus, 85.8 Ma.

**Node 914 | SG Hamamelidaceae | MRCA: *Daphniphyllum-Rhodoleia* | 82.00 Ma.**

**Fossil taxon and specimen.** *Androdecidua endressii* [PP45947: Field Museum, Chicago IL, USA] from the Buffalo Creek Member of the Gaillard Formation in the south pit (Allon Quarry) of the Atlanta Sand and Supply Company in Gaillard, Georgia, ca. 9.5 km southeast of Roberta in Crawford County [76].

**Phylogenetic justification.** The phylogenetic relationships were carefully discussed by the authors introducing the taxon [76].

**Minimum age.** 82.00 Ma

**Age justification.** Christopher correlated this deposit to nannofossil zone CC17 based on its palynoflora, though the evidence on which this is based was not presented. CC17 ranges in age from Late Santonian to Early Campanian and the CC17-18 boundary falls within the *Scaphites hippocrepis* II ammonoid biozone, dated to 82.00 Ma [34].

**Node 952 | SG Dipelta | *Dipelta-Kolkwitzia* | 33.71 Ma.**

**Fossil taxon and specimen.** *Diplodipelta reniptera* [UM 33621: University of Michigan, Ann Arbor MI, USA] from the Florissant Formation, Mormon Cr, Ruby, CO, USA [78].

**Phylogenetic justification.** Based on the distribution of morphological characters in the phylogeny of Caprifoliaceae, this fossil is considered to be sister to the genus *Dipelta* which provide in turn the arguments for this assignment [78, 79].

**Minimum age.** 33.71 Ma.

**Age justification.** The Florissant Formation has been correlated with the early Chron C13r, based on its reversed polarity and a  $^{40}\text{Ar}/^{39}\text{Ar}$  date of 34.07 Ma  $\pm$  0.10 Myr from the upper part of the section [80, 81]. The minimum age for the Florissant flora can be established on the C13r-C13n boundary, which has been dated to 33.71 Ma, based on the combined age model in Vandenberge et al. [50].

**Node 983 | CG Araliaceae core | MRCA: *Cussonia-Tetralpasandra* | 37.3 Ma.**

**Fossil taxon and specimen.** *Dendropanax eocenensis* [W1107: Indiana University paleobotanical collection] from the Claiborne Formation at Warman Clay Pit (2 miles west of Como), Tennessee, USA.

**Phylogenetic justification.** Phylogenetic relationships were discussed by Martinez-Millan [82].

**Minimum age.** 37.3 Ma.

**Age justification.** The Claiborne Formation is commonly attributed a middle Eocene age, but material evidence is rarely presented in support this. Taylor [83] provides a summary of the palynostratigraphic evidence, citing Elsik as supporting a middle Eocene age based on juglandaceous palynomorphs including *Plicatopollis*, *Platycarya*, *Platycaryapollenites*, *Carya* and *Casuarinidites*. Their presence may be indicative of a late Eocene age, though they occur in low frequency and, thus, Taylor [83] argues instead for a Middle Eocene age based on the presence of *Nuxpollenites terminalis* and *Amanoa* type palynomorphs in even the uppermost Claiborne Formation [84]. Thus, we establish a minimum age constraint on the age of *Solanites crassus* based on the Bartonian-Priabonian Boundary, dated to 37.8 Ma  $\pm$  0.5 Myr based on the combined age model of Vandenbergh et al. [50], thus, 37.3 Ma.

**Node 1009 | SG Asteraceae minus Barnadesia | MRCA: *Barnadesia-Helianthus* | 41.5 Ma.**

**Fossil taxon and specimen.** *Tubulifloridites antipodica* from onshore deposits taken from a paleochannel at Koinaas, on the west coast of South Africa.

**Phylogenetic justification.** This fossil is accepted to belong to the Barnadesioides despite its actual placement in the subfamily is ambiguous but this is not a challenge to our analyses<sup>82,85</sup>.

**Minimum age.** 41.5 Ma.

**Age justification.** These occurrences are, described to occur alongside the planktic forams *Globigerinatheka index* and *Turborotalia centralis* [85]. *Globigerinatheka index* is known to range from 42.9 - 34.3 Ma [86], but *Turborotalia centralis* is a junior synonym of *Turborotalia pomeroli*, which is known to range from 42.4-41.5 Ma [86]. Thus, the minimum age constraint on *Tubulifloridites antipodica* is 41.5 Ma. The newly described *Tubulifloridites lilliei* arguably slightly predates the other fossils of this palynological genus in its age<sup>58</sup>.

**Node 1047 | SG Aquifoliaceae | MRCA: *Ilex-Phyllonoma* | 61.6 Ma.**

**Fossil taxon and specimen.** *Ilex hercynica* [MAI, Nr. 6004: Zentralsammlung Zentrales Geologisches Institut Berlin] described from Walkmühle in Gonna, Germany [87-89].

**Phylogenetic justification.** Phylogenetic relationships were discussed by Martinez-Millan [82].

**Minimum age.** 61.6 Ma

**Age justification.** Knobloch et al. [90] assert an early Palaeocene age range for *Ilex hercynica*, affording a minimum constraint of 61.6 Ma based on the Danian-Salandian Boundary and the combined age model of Vandenberghe et al. [50].

**Node 1075 | CG Solanales | MRCA: *Solanum-Montinia* | 37.3 Ma.**

**Fossil taxon and specimen.** *Solanites crassus* [USNM-39949: Smithsonian Institution National Museum of Natural History, Washington DC, USA] from Holly Springs Sand in the Claiborne Formation at Mill Creek, at a railroad cut north of Shandy, Hardeman County, Tennessee, USA [91].

**Phylogenetic justification.** The phylogenetic interpretation of the fossil record of Solanales have been explored recently including the fossil incorporated here .

**Minimum age.** 37.3 Ma.

**Age justification.** The Claiborne Formation is commonly attributed a middle Eocene age, but material evidence is rarely presented in support this. Taylor [83] provides a summary of the palynostratigraphic evidence, citing Elsik [84] as supporting a middle Eocene age based on juglandaceous palynomorphs including *Plicatopollis*, *Platycarya*, *Platycaryapollenites*, *Carya* and *Casuarinidites*. Their presence may be indicative of a late Eocene age, though they occur in low frequency and, thus, Taylor [83] argues instead for a Middle Eocene age based on the presence of *Nuxpollenites terminalis* and *Amanoa* type palynomorphs in even the uppermost Claiborne Formation [84]. Thus, we establish a minimum age constraint on the age of *Solanites crassus* based on the Bartonian-Priabonian Boundary, dated to 37.8 Ma  $\pm$  0.5 Myr based on the combined age model of Vandenberghe et al. [50], thus, 37.3 Ma,

**Node 1098 | CG Ericales core | MRCA: *Arbutus-Camellia* | 85.8 Ma.**

**Fossil taxon and specimen.** *Paleoenkianthus sayrevillensis* [CUPC 1100: L. H. Bailey Hortorium, Cornell University, Ithaca NY, USA] from the South Amboy Fire Clay of the Raritan Formation, of which outcrops are exposed in the Old Crossman Clay Pit in Sayreville, New Jersey.

**Phylogenetic justification.** The phylogenetic relationships of this fossil has been tested based on morphological evidence [93].

**Minimum age.** 85.8 Ma

**Age justification.** Clarke et al. [1] argued that a minimum constraint on the age of this deposit could be established from Santonian-Campanian Boundary, however, Massoni et al. [53] argue that a tighter correlation can be established with better rocks attributable to the CC13-14 Nannofossil zones in South Carolina, indicating a minimum age of 86.3 Ma  $\pm$  0.5 Myr, thus, 85.8 Ma.

**Node 1115 | CG Cornales | MRCA: *Cornus-Petalyonyx* | 85.8 Ma.**

**Fossil taxon and specimen.** *Tylerianthus crossmanensis* [CUPC 1047: L. H. Bailey Hortorium, Cornell University, Ithaca NY, USA] from the South Amboy Fire Clay of the Raritan Formation, of which outcrops are exposed in the Old Crossman Clay Pit in Sayreville, New Jersey [94].

**Phylogenetic justification.** The phylogenetic relationships of this fossil have been clarified [95, 96].

**Minimum age.** 85.8 Ma

**Age justification.** Clarke et al. [1] argued that a minimum constraint on the age of this deposit could be established from Santonian-Campanian Boundary, however, Massoni et al. [53] argue that a tighter correlation can be established with better rocks attributable to the CC13-14 Nannofossil zones in South Carolina, indicating a minimum age of 86.3 Ma  $\pm$  0.5 Myr, thus, 85.8 Ma.



**Node 1171 | CG Buxales | MRCA: *Didymeles-Buxus* | 100.1 Ma.**

**Fossil taxon and specimen.** *Spanomera marylandensis* [PP42978: Field Museum, Chicago IL, USA] described by Drinnan et al. from the Potomac Formation at West Brothers clay pit, east of Washington, DC, Prince Georges County, eastern Maryland (late Albian), assigned to Palynozone IIB.

**Phylogenetic justification.** Based on similarities in the inflorescences and the striate tricolpate pollen, this fossil is likely related to the extant Buxaceae [98].

**Minimum age.** 100.1 Ma

**Age justification.** In the absence of further constraint on where within Zone IIB *Spanomera marylandensis* was recovered, we take the upper age constraint on the age of this zone to establish a minimum age constraint. Massoni et al. [53] argued that deposits lower within IIB were middle Albian, but Hochuli et al. [99] have demonstrated that at least some of Zone IIB is Upper Albian. Thus, we establish our minimum age constraint on the Albian-Cenomanian Boundary, dated to 100.5 Ma 0.4 Myr [34].

**Node 1175 | CG Proteales | *Nelumbo-Platanus* | 107.59 Ma.**

**Fossil taxon and specimen.** *Aquia brookensis* [PP4295: Field Museum, Chicago IL, USA] described by Crane et al. [100] from the Potomac Formation at Bank, near Brooke, Virginia, USA.

**Phylogenetic justification.** Doyle [98] recognized *Aquia* (combination of *Sapindopsis variabilis*, *Platanocarpus brookensis*, *Aquia brookensis*) as a stem group member of the genus *Platanus* and the widespread Albian leaf fossil *Nelumbites* as related to the genus *Nelumbo*.

**Minimum age.** 107.59 Ma

**Age justification.** Palynological correlations place Brooke in lower Subzone II-B, for which Massoni et al. [53] provide a very detailed biostratigraphic justification for a middle Albian age, to which we refer readers. Thus, a minimum constraint for Proteales may be established on the middle-late Albian Boundary, which coincides with the base of the *Diploceras cristatum* Biozone, dated to 107.59 Ma [34].

**Node 1182 | SG Menispermaceae | MRCA: *Menispermum-Ranunculus* | 83.41 Ma.**

**Fossil taxon and specimen.** *Prototynomiscium testudinarum* and *P. vangerowii* from Klikov Formation, Czech Republic [89].

**Phylogenetic justification.** The phylogenetic relationships of the fossil were clarified in a study testing them as calibration points for divergence time estimates of Menispermaceae [101].

**Minimum age.** 83.41 Ma

**Age justification.** An Upper Turonian-Santonian age was established for the Klikov Formation by Pacltova [102] and Knobloch [103]. Thus, a minimum constraint can be established on the Santonian-Campanian Boundary, coincident with the base of the *Scaphites Leei III* Zone, dated to 83.64 Ma  $\pm$  0.23 Myr [34], thus, 83.41 Ma.

**Node 1193 | CG Monocots | MRCA: *Acorus-Saccharum* | 112.6 Ma.**

**Fossil taxon.** The earliest records of *Liliacidites* occur at the Trent's Reach Locality of the Potomac Group, attributable to the Albian Zone I [99].

**Phylogenetic justification.** Doyle et al. [104] identified pollen referred to the genus *Liliacidites* (but not *Similipollis*) as representative of the monocot stem, making it the oldest secure record of the monocot total group (see [98]).

**Minimum age.** 112.6 Ma.

**Age justification.** In the absence of further stratigraphic constraint, these earliest records of *Liliacidites* can be constrained in age by the Aptian-Albian Boundary, dated to 113.0 ma  $\pm$  0.4 Myr, thus, 112.6 Ma.

**Discussion.** Doyle et al. [104] highlight that, despite decades of sampling of the Hauterivian and Barremian of England, no clear representatives of *Liliacidites* pollen have been recovered [105], perhaps implying that the earliest records from the Albian are a close approximation of their antiquity. Because of the position of monocots in our molecular tree we consider *Liliacidites* to be nested within monocots, and use it to calibrate the monocot crown node.

**Node 1209 | SG Musaceae | MRCA: *Musa-Maranta* | 74.6 Ma.**

**Fossil taxon and specimen.** *Spirematospermum chandlerae* has been described from isolated seeds and groups of seeds from the Neuse River locality, Black Creek Formation, southwest of Goldsboro, Wayne County, North Carolina, USA.

**Phylogenetic justification.** The phylogenetic relationships of this fossil have discussed in previous studies [106].

**Minimum age.** 74.6 Ma.

**Age justification.** Widely reported, but not evidenced as Late Cretaceous (Early Campanian) in age [107], the Black Creek Formation has been assigned to the *Exogyra ponderosa* Biozone which occurs beneath the *Didymoceras cheyennense* Tethyan ammonoid biozone [108], the base of which is dated to 74.6 Ma [34].

**Node 1211 | CG Arecales | MRCA: *Elaeis-Chamaedorea* | 83.41 Ma.**

**Fossil taxon and specimen.** *Sabalites carolinensis* [PAL 175717/P 38208: Smithsonian Museum of Natural History; Washington DC, USA] described from the Middendorf Arkose Member of Black Creek Formation near Langley, Aiken County, South Carolina [109].

**Phylogenetic justification.** The phylogenetic relationships of this fossil have discussed in Hertweck et al. [106] and Iles et al. .

**Minimum age.** 83.41 Ma

**Age justification.** Berry's view that the Middendorf was merely a distinct facies within the Black Creek Formation, rather than a stratigraphically distinct unit, has been rejected. Sohl and Owens [111] subdivided the Upper Cretaceous of Carolina coastal plain into three lithostratigraphic units, the Middendorf, Black Creek and Peedee Formations, raised the Black Creek to group status and subdivided this into three unconformity-bound formations, viz. in stratigraphic sequence, the Tar Heel, Bladen and Donoho Creek formations. Evidently, *Sabalites carolinensis* was recovered from what is now recognized as the Middendorf Formation, and a minimum age constraint can be established on the boundary between the Middendorf and Tar Heel Formations. The Middendorf is commonly considered Santonian in age, however, little material evidence has been presented in support of this, in part a consequent of the complex history of stratigraphic divisions at outcrop, in subsurface and offshore [112]. Habib and Miller [113] established an age 'not younger than Campanian' on the basis of dinoflagellate biostratigraphy, but following the stratigraphic scheme outlined Campbell and Grohn [112], the Middendorf is older than the Shepherd Grove Formation and, therefore, following the stratigraphy of Christopher and Prowell [108], must be no younger than Santonian. Thus, we may established a minimum age constraint on the *Sabalites carolinensis* based on the Santonian-Campanian Boundary, coincident with the base of the *Scaphites leei* III Zone, dated to 83.64 Ma  $\pm$  0.23 Myr [34], thus, 83.41 Ma.

**Node 1221 | CG Orchidaceae | MRCA: *Oncidium-Phaelaenopsis* | 17.82 Ma.**

**Fossil taxon and specimen.** *Meliorchis caribea* [MCZ-31141: Museum of Comparative Zoology (Harvard University), Cambridge MA, USA], recovered from a mine east of Santiago, Cordillera Septentrional, Dominican Republic [114].

**Phylogenetic justification.** This amber fossil is composed of a pollinium attached to the wing of a stingless bee showing some similarities to the extant genus *Ligeophila* [114]. Pollinium structure provide unequivocal evidence for the occurrence of Orchidaceae at this time.

**Minimum age.** 17.82 Ma.

**Age justification.** The age of Dominican Amber has been the subject of much speculation, but its dating has been best constrained on the basis of planktic forams, to late Early to early Middle Miocene [115] who list a series of biostratigraphically important species of planktic foraminifera, the stratigraphic ranges of which are not entirely compatible. However, the contemporaneous sediments contain including *Catapsydrax dissimillis*, the last appearance of which has been dated to 17.62 Ma [86], providing a minimum constraint on the age of *Meliorchis caribea*.

**Node 1222 | CG Lillales | *Trillium-Lilium* | 18.7 Ma.**

**Fossil taxon and specimen.** *Luzuriaga contortus* [L24916: Palynological Type Collection of the New Zealand Institute of Geological and Nuclear Sciences], based on leaf remains, from the Foulden Hill Diatomite, near Middlemarch, Otago, New Zealand [116].

**Phylogenetic justification.** The preserved structure show high similarity to structures observed in extend this of the genus *Luzuriaga* and therefore the fossil is assigned unequivocally to the Alstromeriaceae .

**Minimum age.** 18.7 Ma.

**Age justification.** The deposit has been well studied and its maximum age is constrained by radiometric dating to 23.3 Ma  $\pm$  0.2 Ma [117]. The deposit has been attributed to the Waitakian, but a minimum age constraint must also encompass evidence of early Otaian elements of the flora and fauna, including *Assamiapollenites incognitus* which extends into the Otaian *Proteacidites isopogiformis* Zone [118]. The Otaian-Altonian Boundary has been dated to 18.7 Ma [119, 120].

**Node 1224 | CG Dioscoreales-Pandanales| MRCA: *Dioscorea-Croomia* | 85.8 Ma.**

**Fossil taxon and specimen.** *Mabelia connatifila* [CUPC 1255: L. H. Bailey Hortorium Paleobotanical Collection, Cornell University, Ithaca NY, USA] from the South Amboy Fire Clay Member of the Raritan Formation at the Old Crossman clay pit in Sayreville, New Jersey, USA [121].

**Phylogenetic justification.** The phylogenetic assignment is based on the phylogenetic hypothesis reconstructed by Gandolfo et al. [121].

**Minimum age.** 85.8 Ma.

**Age justification.** Clarke et al. [1] argued that a minimum constraint on the age of this deposit could be established from Santonian-Campanian Boundary, however, Massoni et al. [53] argue that a tighter correlation can be established with better rocks attributable to the CC13-14 Nannofossil zones in South Carolina, indicating a minimum age of 86.3 Ma  $\pm$  0.5 Myr, thus, 85.8 Ma.

**Node 1226 | CG Alismatales | MRCA: *Orontium-Hydrocharis* | 96.24 Ma.**

**Fossil taxon and specimen.** *Mayoa portugallica* [S136663: Swedish Museum of Natural History Palaeobotanical Collection], from the Torres Vedras flora of the Figueira da Foz Formation [122], as the oldest record of crown-Alismatales.

**Phylogenetic justification.** Magallón et al. [13] argue that these striate and inaperturate pollen grains are similar to those of Monsteroideae (Araceae), such as *Holochlamys* and *Spathiphyllum*.

**Minimum age.** 96.24 Ma

**Age justification.** The Torres Vedras flora has been considered Late Barremian to Early Aptian in age [71, 123]. However, recent evidence suggests that they are considerably younger, within the ‘Upper Almagem’ Formation overlying a late Aptian to early Albian unconformity [124]. Despite the uncertainty, an unequivocal minimum age is provided by the appearance of ostracod *Fossocytheridea merlensis* in the overlying Canecas Formation, attributable to the base of the Middle Cenomanian [125, 126], which coincides with the base of the Conlinoveras gilberti Zone, dated to 96.24 Ma [34].

**Node 1228 | MRCA: *Alisma-Potamogeton* | 66 Ma.**

**Fossil taxon and specimen.** *Cardstonia tolmanii* [UAPC-ALTA S55138: University of Alberta Paleobotanical Collections] from the St. Mary River Formation [127].

**Phylogenetic justification.** Ridley and Stockey (2004) provided a convincing argument that this fossil shows closest similarity to extant genera of Alismatales. This interpretation is accepted here.

**Minimum age.** 66 Ma.

**Age justification.** Riley and Stockey [127] attribute *Cardstonia tolmanii* to the Late Campanian–Early Maastrichtian (Upper Cretaceous), though there is little direct evidence to support this. However, the St. Mary River Formation is chronostratigraphically equivalent to the Horseshoe Canyon Formation into which it intergrades and which in turn is constrained minimally by the C30n magnetozone [128], the top of which is slightly older than the Maastrichtian-Paleogene Boundary, dated to 66.0 Ma [34].

**Node 1232 | CG Araceae | MRCA: *Orontium-Xanthosoma* | 76 Ma.**

**Fossil taxon and specimen.** *Lysichiton (Araciphyllites) austriacus* [NHMW 1999B0057/0183: Natural History Museum, Vienna, Austria], from the Grünbach Formation of Austria, is the oldest record of this clade [129, 130]

**Phylogenetic justification.** This fossil was interpreted as closely related to extant species of the Orontioideae (family Araceae) by Bogner et al. [129]. This assignment is supported by the occurrence of several putative related fossil taxa at around the same time [131].

**Minimum age.** 76 Ma.

**Age justification.** The Grünbach Formation can be attributed to the *Globotruncata elevata* planktic foram biozone and the UC15 calcareous nannofossil biozone [130, 132]. The overlying Piesting Formation has been attributed to the UC16 nannofossil biozone [130, 132] and, thus, the age of the Grünbach Flora can be constrained by the UC15-UC16 boundary which is estimated to be 76 Ma [34].

**Node 1237 | CG Laurales | MRCA: *Laurus-Calycanthus* | 107.59 Ma.**

**Fossil taxon and specimen.** *Virginianthus calycanthoides* [PP43703: Field Museum, Chicago IL, USA] from the Albian of Puddledock, Virginia [133].

**Phylogenetic justification.** Doyle and colleagues [104, 134] identify *Virginianthus calycanthoides* from the Albian of Puddledock, Virginia [133], as the sister group to Calycanthaceae, or to the remaining Laurales, in either instance the oldest record of crown Laurales. Massoni et al. [53] also recognise *Cohongarootonia hispida* from the Puddledock Flora [135] as the oldest record of the total group comprised of Lauraceae, Monimiaceae, and Hernandiaceae, in other words the crown node of the clade of Laurales excluding Calycanthaceae [53]. We accept both of these as records of crown-Laurales, deeming evidence of their membership of more derived clades as insufficiently robust to be used as a basis for calibration.

**Minimum age.** 107.59 Ma.

**Age justification.** Massoni et al. [53] reason that the sediments in the Puddledock Locality are definitively early Albian based on the presence of reticulate tricolpate pollen and *Clavatipollenites rotundus* (aff. *Retimonocolpites dividuus* [136] but not striate tricolpates, which occur later in the early Albian.

**Node 1248 | CG Magnoliales | MRCA: *Magnolia-Myristica* | 110.87 Ma.**

**Fossil taxon and specimen.** *Endressinia brasiliana* [MB. PB. 2001/1455: Museum of Natural History, Institute of Paleontology, Berlin, Germany], from the Crato Formation of Brazil [137].

**Phylogenetic justification.** Masson et al. identify both *Schenkeriphyllum glanduliferum* and *Endressinia brasiliana*, both from the Crato Formation of Brazil [137, 138], as the oldest records of crown Magnoliineae, the sister clade of Myristicaceae, based on the phylogenetic analyses [98, 134, 138].

**Minimum age.** 110.87 Ma.

**Age justification.** Clarke et al. [1] argued that the age of the Crato Formation could not be constrained to being definitively older than Albian based on pollen [140], ostracod [141], and dinoflagellate [142] biostratigraphy and, in the absence of further evidence, established a minimum constraint on the Albian-Cenomanian boundary. Massoni et al. [53] argued for an Aptian age for the Crato Formation based on evidence from Heimhofer and Hochuli [142] but, unfortunately, these authors do not present evidence that can discriminate against a possible early Albian age for the Crato Formation, as acknowledged by Mohr et al. [138]. While the evidence suggests at worst, an early Albian age for the Crato Formation, and so it is possible to derive a minimum age interpretation for the Formation based on the Early-Middle Albian Boundary, which coincides approximately with the base of the *Douvilleiceras mamillatum* ammonite biozone, dated to 110.87 Ma [34].

**Discussion.** *Archaeanthus linnenbergii* was recognized as a further putative stem group Magnoliaceae but it is younger than *Endressinia* [53, 98].

**Node 1256 | SG Canellales | MRCA: *Piper-Canella* | 125.9 Ma.**

**Fossil taxon and specimen.** *Walkeripollis gabonensis* [Single-pollen grain preparation 2963-27: University of California (Berkeley) Museum of Paleontology], Cocobeach sequence near N'Toum, Gabon [53].

**Phylogenetic justification.** Massoni et al. [53] identify *Walkeripollis gabonensis* as the oldest record of Canellales, based on phylogenetic of pollen grain characters that resolve this pollen species as stem-Winteraceae [134], one of the two families that comprise Canellales, based on the presence of permanent tetrads, rounded aperture shape, as well as characteristic pore sculpture.

**Minimum age.** 125.9 Ma.

**Age justification.** Massoni et al. [53] establish a pre-Aptian age for *Walkeripollis gabonensis* based on the correlation of its occurrence in the Elf-Aquitaine palynological Subzone C-VIIc of the Cocobeach sequence near N'Toum, Gabon, to better-dated late Barremian sequences elsewhere. Thus, a minimum age constraint is established on the Barremian-Aptian boundary that has been dated to 126.3 Ma  $\pm$  0.4 Myr, thus, 125.9 Ma.

**Discussion.** Massoni et al. [53] proposed records of more derived clades within Canellales (e.g. *Appomattoxia*, including the pollen of *Tucanopollis* and *Transitoripollis* types, from the Puddledock, Virginia [143], and Torres Vedras, Portugal [71, 144]). However, these are not sufficiently convincing to use as a basis for calibration. For example, *Appomattoxia* maybe more closely related to *Ceratophyllum* and Chloranthaceae [98].

**Node 1260 | SG Saururus | MRCA: *Saururus-Houttuynia* | 44.3 Ma.**

**Fossil taxon and specimen.** *Saururus tuckerae* [UAPC P1631 Bbot a: University of Alberta (Edmonton) Paleobotanical Collections] from the Middle Eocene Princeton Chert, British Columbia, Canada.

**Phylogenetic justification.** Massoni et al. [53] follow Smith and Stockey [145] in identifying *Saururus tuckerae* as the oldest record of total group *Saururus*. Based on tens of flowers and a partial inflorescence, the flower structure and pollen are characteristic of Saururaceae (Piperales), and phylogenetic analyses resolved *S. tuckerae* as the sister clade to extant *Saururus* [145].

**Minimum age.** 44.3 Ma.

**Age justification.** The Princeton Chert is part of the Allenby Formation which has been the subject of a number of absolute dating studies yielding age estimates of 48 Ma  $\pm$  2 Myr [146, 147], between 47 Ma  $\pm$  2 Myr and 50 Ma  $\pm$  2 Myr [148], between 46.2 Ma  $\pm$  1.9 Myr and 49.4 Ma  $\pm$  2 Myr [149], and 52.08 Ma  $\pm$  0.12 Myr [150] for the Allenby Formation. We follow Massoni et al. [53] in basing our minimum constraint based on the youngest age Interpretation of the youngest radiometric age estimate, viz. 44.3 Ma

**Node 1268 | CG Chloranthales | MRCA: *Chloranthus-Hedyosmum* | 92.8 Ma.**

**Fossil taxon and specimen.** *Pennipollis* plant [151] based on material from Vale de Agua, Buarcos, Portugal [152].

**Phylogenetic justification.** *Pennipollis* was found as sister to the crown group Chloranthaceae [153], whereas the Aptian to Cenomanian *Asteropollis* mesofossils may represent both crown and stem group Chloranthaceae [98].

**Minimum age.** 92.8 Ma.

**Age justification.** Clarke et al. [1] established a minimum age for Vale de Agua, which is assigned to the Figueira da Foz Formation [154-156] based on the overlying Costa d'Arnes Formation, the oldest ammonites in



which include *Calycoceras naviculare* [157], indicative of the naviculare biozone, the dating of which in error of the top of the Cenomanian, dated 93.6 Ma  $\pm$  0.8 Myr [34], thus, 92.8 Ma.

**Discussion.** Other early Cretaceous fossils with possible relationships to Chloranthaceae, such as *Zlatkarpus* and *Canrightia* are younger than *Pennipolis* [98].

**Node 1272 | SG Schisandraceae | MRCA: Trimenia-Kadsura | 107.59 Ma.**

**Fossil taxon and specimen.** *Anacostia virginiensis* based on material from Kenilworth, Maryland, Puddledock, Virginia .

**Phylogenetic justification.** The assignment is based on the result of maximum parsimony based reconstruction of the phylogenetic relationships of this fossil to extant angiosperms that recovered this taxon as nested between *Trimenia* and the clade comprising *Illicium* and *Schisandra* [153].

**Minimum age.** 107.59 Ma.

**Age justification.** Massoni et al. [53] reason that the sediments in the Puddledock Locality are definitively early Albian based on the presence of reticulate tricolpate pollen and *Clavatipollenites rotundus* (aff.

*Retimonocolpites dividuus* [136]) but not striate tricolpates, which occur later in the early Albian. Therefore, they constrain minimally the age of the *A. virginiensis* by the Middle-late Albian boundary, which coincides with the base of the *Diploceras cristatum* biozone which has been dated to 107.59 Ma [34].

**Discussion.** *Anacostia*, reportedly from the early and middle Albian of Buarcos, Famalicão, and Vale de Agua (Portugal), Puddledock (Virginia, USA), and Kenilworth (Maryland, USA) was recognized as the oldest fossil record of the Austrobaileyaales [98, 153]. Doyle and Endress [153] identified *Anacostia portugallica* and *A. teixeirae* as early Albian and, therefore the oldest species belonging to this lineage. However, the minimum age interpretation of these localities the Figueira da Foz Formation cannot be constrained minimally to more than 92.8 Ma (see above). However, the minimum age constraint on *A. virginiensis* from the Puddledock Locality is older.

**Node 1273 | SG Illicium | MRCA: Illicium-Schisandra | 85.44 Ma.**

**Fossil taxon and specimen.** *Illiciospermum pusillum* [1700b-127: Komarov Botanical Institute, St. Petersburg, Russia.], known from seeds from the Cenomanian-Turonian of Kazakhstan [158].

**Phylogenetic justification.** *Illiciospermum pusillum*, known from seeds that preserve a structure resembling the strophiole of *Illicium* [158].

**Minimum age.** 85.44 Ma.

**Age justification.** There is a paucity of evidence supporting the age interpretation of the Sarbay Quarry near Rudnyy, Kustanay Region, north-western Kazakhstan. Frumin and Friis (1996) describe the sediments, including the plant-bearing bed, as belonging to the Shet-Irgiz Formation of Cenomanian-Turonian age [159], overlain by marine sands of the Santonian-Campanian Ayat Suite containing *Inoceramus cardissoides* [159]. The *Inoceramus cardissoides* Zone falls fully within the *Sigalia carpatica* Planktic foraminiferal Zone [160], the range end of which is dated to 85.44 Ma [34].

**Node 1276 | SG Cabombaceae | MRCA: Nymphaea-Cabomba | 110.87 Ma.**

**Fossil taxon and specimen.** *Pluricarpellatia peltata* [MB.Pb. 2000/80: Museum of Natural History, Berlin, Germany], from the Crato Formation of Brazil [161]

**Phylogenetic justification.** *Pluricarpellatia peltata* has been considered phylogenetically and resolved as members of the lineage leading to *Cabomba* after it diverged from *Nymphaea* [162].

**Minimum age.** 110.87 Ma.

**Age justification.** Clarke et al. [1] argued that the age of the Crato Formation could not be constrained to being definitively older than Albian based on pollen [140], ostracod [141], and dinoflagellate [142] biostratigraphy and, in the absence of further evidence, established a minimum constraint on the Albian-Cenomanian boundary. Massoni et al. [53] argued for an Aptian age for the Crato Formation based on evidence from Heimhofer and Hochuli [142] but, unfortunately, these authors do not present evidence that can discriminate against a possible early Albian age for the Crato Formation, as acknowledged by Mohr et al. [138]. While the evidence suggests, at worst, an early Albian age for the Crato Formation, it is possible to derive a minimum age interpretation for the Formation based on the Early-Middle Albian Boundary, which coincides approximately with the base of the *Douvilleceras mammillatum* ammonite biozone, dated to 110.87 Ma [34].

**Discussion.** Magallon et al. [13] derive a minimum constraint from *Monetianthus mirus* which they recognize as a representative of the Nymphaeaceae stem lineage and, thus, use it as the basis of a minimum constraint on the age of total-group Nymphaeaceae at 125 Ma. However, Clarke et al. [1] demonstrated that the minimum age of the host deposit, Vale de Água, Portugal [163, 164] is 93.9 Ma [34]. However, there are other, potentially older records of Nymphaeaceae and, more specifically, the crown clade circumscribed by *Nymphaea-Cabomba*. Clarke et al. [1] identified much older, but more equivocal records, as well as the oldest unequivocal records, viz. *Pluricarpellatia peltata* from the Crato Formation of Brazil [161] and *Scutifolium jordanicum* from the

Jarash Formation (Kurnub Group) of Jordan [162], both of which have been considered phylogenetically and resolved as members of the lineage leading to *Cabomba* after it diverged from *Nymphaea* [162]. *Scutifolium jordanicum* was used to establish a minimum age for crown-Nymphaeales at 105 Ma by Smith et al. [165], and for total-group Cabombaceae at 105 Ma by Zanne et al. [166]. The Jarash Formation can be dated minimally to 95 Ma (96.1 Ma  $\pm$  1.1 Myr in [167]), but the Crato Formation is older .

**Node 1278 | CG Nymphaeaceae | MRCA: *Nymphaea* - *Nuphar* crown | 92.8 Ma.**

**Fossil taxon and specimen.** *Monetianthus mirus* [S122015: Palaeobotanical Collectons, Swedish Museum of Natural History, Stockholm, Sweden] from Vale de Agua, Portugal [164].

**Phylogenetic justification.** Doyle and Endress [153] identify *Monetianthus mirus*, a coalified flower from Vale de Agua, Portugal, as a stem member of the clade Barclaya-Nymphaeoidae, to the exclusion of *Nuphar*.

**Minimum age.** 92.8 Ma.

**Age justification.** Clarke et al. [1] established a minimum age for Vale de Agua, which is assigned to the Figueira da Foz Formation [154-156], based on the overlying Costa d'Arnes Formation, the oldest ammonites in which include *Calycoceras naviculare* [157], indicative of the *naviculare* Biozone, the dating of which in error of the top of the Cenomanian, dated 93.6 Ma  $\pm$  0.8 Myr [34], thus, 92.8 Ma.

**Node 1279 | CG Acrogymnosperms | MRCA: *Ginkgo-Pinus* | 308.14 Ma – 365.629 Ma.**

**Fossil taxon and specimen.** *Cordaites iowensis* [UM4616: University of Michigan and Illinois Geological Survey, Ann Arbor MI, USA] from the Ladddale Coals (Cherokee Group, Desmoinesian) near What Cheer, Iowa, USA [22].

**Phylogenetic justification.** Clarke *et al.* [1] identify cordaitan coniferophytes as the oldest records of the *Ginkgo-Pinus* clade, the oldest whole plant reconstruction of which is *Cordaites iowensis* from the Ladddale Coals (Cherokee Group, Desmoinesian) near What Cheer, Iowa [22].

**Minimum age.** 308.14 Ma.

**Maximum age:** 365.629 Ma.

**Age justification.** Janousek and Pope [23] argue that the Ladddale Coal is equivalent to the Bluejacket Coal of Oklahoma, which occurs as part of the Bluejacket Sandstone Member, underlying the Inola Limestone, part of the Inola Cyclothem of the Krebs subgroup of the Cherokee Group, characterized by the occurrence of the conodonts *Idiognathodus amplificus*, *Idiognathodus podolskensis* and *Neognathodus asymmetricus* [24]. The Inola cyclothem falls fully within the *Idiognathodus amplificus/ Idiognathodus obliquus* biozone [25]. This is indicative of the *Neognathodus medexultimus-Streptognathodus concinnus* (Pc10) biozone, certainly older than the *Neognathodus roundyi – Streptognathodus cancellosus* (Pc11) biozone [25, 26]. The base of Pc10 is bracketed by an older age constraint of 312.01 Ma  $\pm$  0.37 Myr and the base of Pc11 is bracketed by a younger age constraint of 308.5 Ma  $\pm$  0.36 Myr in the Composite Standard of Davydov et al. [26], yielding a minimum age constraint of 308.14 Ma. A soft maximum is based upon the first appearance of seeds in the form of preovules which are attributable to the spermatophyte stem, the oldest interpretation of which is 365.629 Ma (see Spermatophyta).

**Discussion.** Zanne et al. [166] derive a minimum constraint from *Emporia lockardii* at 290.0 Ma which they recognize as a member of crown-Acrogymnospermae within a phylogenetic concept of the group in which, as here, cycads and *Ginkgo* comprise a clade.

**Node 1280 | CG Conifers | MRCA: *Pinus-Metasequoia* | 147 Ma - 312.38 Ma.**

**Fossil taxon and specimen.** *Araucaria mirabilis* [NHM V. 30953: Natural History Museum, London, UK], represented by cones, from Cerro Cuadrado petrified forest, La Matilde Formation, Patagonia, Argentina [168-171].

**Phylogenetic justification.** These fossils possess a 'vascular plexus' at the ovule base, ovuliferous scale vascularization, two vascular strands to the conescale complex and an embryo with two cotyledons, all characters established to distinguish *Araucaria* section *Bunya* of the Araucariaceae [170, 172], to which only extant *Araucaria bidwillii* belongs.

**Minimum age.** 147 Ma.

**Maximum age:** 312.38 Ma.

**Age justification.** The age of La Matilde Formation is poorly constrained as the stratigraphy is complex, although the volcanic deposits do allow radiometric dating. La Matilde Formation is overlain by volcanics dated to 157 Ma  $\pm$  10 Myr [173], and thus the minimum constraint on the divergence of crown Cupressophyta, total group Cupressophyta and crown Coniferae is 147 Ma. A soft maximum constraint can be based on *Cordaites iowensis*, a cordaitan coniferophyte from the Ladddale Coals (Cherokee Group, Desmoinesian) near What Cheer, Iowa [22], is the oldest whole plant reconstruction for Coniferae. Janousek and Pope [23] argue that the Ladddale Coal is equivalent to the Bluejacket Coal of Oklahoma, which occurs as part of the Bluejacket Sandstone Member, underlying the Inola Limestone, part of the Inola Cyclothem of the Krebs subgroup of the

Cherokee Group, characterized by the occurrence of the conodonts *Idiognathodus amplificus*, *Idiognathodus podolskensis* and *Neognathodus asymmetricus* [24]. The Inola cyclothem falls fully within the *Idiognathodus amplificus/ Idiognathodus obliquus* biozone [25]. This is indicative of the *Neognathodus medexultimus-Streptognathodus concinnus* (Pc10) biozone, certainly older than the *Neognathodus roundyi – Streptognathodus cancellosus* (Pc11) biozone [25, 26]. The base of Pc10 is bracketed by an older age constraint of 312.01 Ma  $\pm$  0.37 Myr and the base of Pc11 is bracketed by a younger age constraint of 308.5 Ma  $\pm$  0.36 Myr in the Composite Standard of Davydov et al. [26], yielding a soft maximum of 312.38 Ma.

**Discussion.** This is the fundamental divergence of Coniferae into Cupressophyta, Gnetales and Pinaceae. The oldest secure records of the gnepine total group occur within the Yixian Formation of Liaoning, China, the minimum age of which is 121.8 Ma (see [1]). The oldest possible records of Cupressophyta total group include Triassic *Rissikia media* (Townrow, 1967) but it lacks the Podocarpaceae diagnostic feature of one ovule per cone scale, instead possessing two [1]. Other Triassic-Jurassic records are equally problematic [174-176].

**Node 1282 | CG Gnetales | MRCA: *Gnetum-Welwitschia* | 119.6 Ma – 312.38 Ma.**

**Fossil taxon and specimen.** *Eoantha zherikhinii* [Repository of the Institute of Biology and Pedology, Vladivostok, Russia], from the Zaza Formation at the Baisa locality in the upper reaches of the Vitim River in Lake Baikal [177].

**Phylogenetic justification.** This fossil is assigned as a representative of the Gnetales because of the presence of an ovule with an extending micropylar tube similar to extend Gnetales and the presence of polyplacate pollen of *Ephedritopes*-type (see [178]). *Eoantha* is one out of several Early Cretaceous fossils unequivocally assigned to the crown Gnetales [179]

**Minimum age.** 119.6 Ma.

**Maximum age.** 312.38 Ma.

**Age justification.** The Zaza Formation can be correlated with the Turga Formation, also of Transbaikalia based principally on common elements of their floral assemblages, including *Asteropollis asteroides*, *Dicotylophyllum pusillum*, *Baisa hirsuita*, *Podozamites*, *Schizolepis*, *Pseudolarix*, *Phoenicopsis*, *Czekanowskia rigida* and *Sphenobaiera* [177, 180-182]. The age of the Turga flora and Formation is based on the chronological distribution of *Asteropollis* type pollen, but correlation with the Yixian Formation of China is also supported strongly [180], allowing for refinement of the *Asteropollis*-derived ages. Correlation between Turga and Yixian is based on similarities in the floral assemblages of these two formations, with the shared presence of the species *Baisa hirsuita*, *Botrychites reheensis*, *Neozamites verchojanensis*, *Pityolepis pseudotsugoides*, *Brachyphyllum longispicum*, *Scarbugia hillei*, *Ephedrites chenii*, *Carpolithus multiseptatus*, *Carpolithus pachyhelis*, *Schizolepis*, *Baiera*, *Coniopteris*, *Ginkgoites*, *Pityocladus*, *Pityospermum* and *Elatocladus* [177, 180, 183]. The shared presence of *Asteropollis asteroides* in Turga and Zaza can be used to constrain their age. The last appearance of *Asteropollis* pollen is in Antarctica [184] and is dated to the end-Campanian, at the latest 72.1 Ma  $\pm$  0.2 [34]. This minimum may be constrained further based on the correlation of the Zaza Formation through the Turga Formation to the Yixian Formation. The main fossil bearing beds in the Yixian Formation have been recently dated and may be as old as 129.2 Ma [41], however, in the absence of knowledge of the position of the fossils within the stratigraphy, relative to the sources of the absolute dates, a minimum age constraint can be derived from the Jiufontang Formation which overlies it.  $^{40}\text{Ar}/^{39}\text{Ar}$  dating of a number of samples from the Jiufontang Formation has yielded an age of 120.3  $\pm$  0.7 Ma for the volcanic tuffs [42], establishing a minimum constraint of 119.6 Ma for the age of the Yixian, Formation and, thus ultimately the Zaza Formation.

A soft maximum constraint can be based on *Cordaites iowensis*, a cordaitan coniferophyte from the Laddsdale Coals (Cherokee Group, Desmoinesian) near What Cheer, Iowa [22], is the oldest whole plant reconstruction for Coniferae. Janousek and Pope [23] argue that the Laddsdale Coal is equivalent to the Bluejacket Coal of Oklahoma, which occurs as part of the Bluejacket Sandstone Member, underlying the Inola Limestone, part of the Inola Cyclothem of the Krebs subgroup of the Cherokee Group, characterized by the occurrence of the conodonts *Idiognathodus amplificus*, *Idiognathodus podolskensis* and *Neognathodus asymmetricus* [24]. The Inola cyclothem falls fully within the *Idiognathodus amplificus/ Idiognathodus obliquus* biozone [25]. This is indicative of the *Neognathodus medexultimus-Streptognathodus concinnus* (Pc10) biozone, certainly older than the *Neognathodus roundyi – Streptognathodus cancellosus* (Pc11) biozone [25, 26]. The base of Pc10 is bracketed by an older age constraint of 312.01 Ma  $\pm$  0.37 Myr and the base of Pc11 is bracketed by a younger age constraint of 308.5 Ma  $\pm$  0.36 Myr in the Composite Standard of Davydov et al. [26], yielding a soft maximum of 312.38 Ma.

**Node 1284 | MRCA: *Ginkgo-Cycas* | 264.7 Ma – 365.629 Ma.**

**Fossil taxon and specimen.** *Crossozamia chinensis* [GP0027: Beijing Graduate School, China Institute of Mining, Beijing, China], Lower Shihhotse Formation at Simugedong, Dongshan (East Hills), Taiyuan, north China [185].

**Phylogenetic justification.** Nagalingum et al. [186] identify *Crossozamia* as the oldest record of the *Cycas* lineage, based on megasporophylls that exhibit similarity to extant *Cycas* [185]. They argue against the interpretation of *Crossozamia* as the sister lineage of *Cycas* based on the presence of an estipulate leaf base and a terminal pinna found in the seedlings [187], instead favouring its assignment to the cycad stem. The arguments presented clearly raise doubts about the assignment of *Crossozamia* to crown-cycads, however, they do not provide definitive evidence of its exclusion from this clade and so *Crossozamia* may more appropriately be assigned to the cycad total group (i.e. we cannot discriminate between a stem or crown-cycad affinity based on the available evidence). In either instance, *Crossozamia* is the oldest record of the minimal clade comprised of *Ginkgo* and *Cycas*.

**Minimum age.** 264.7 Ma.

**Maximum age.** 365.629 Ma.

**Age justification.** The Lower Shihhotse Formation at Simugedong, Dongshan (East Hills), Taiyuan, north China [185] has been established biostratigraphically as Roadian-Wordian (middle Permian) [188] and, thus a minimum age constraint can be established on the Wordian-Capitanian Boundary which has been dated to 265.1 Ma  $\pm$  0.4 Myr [189]. Thus, the minimum age constraint on the *Cycas-Ginkgo* clade is 264.7 Ma. A soft maximum is based upon the first appearance of seeds in the form of preovules which are attributable to the spermatophyte stem, the oldest interpretation of which is 365.629 Ma (see Spermatophyta).

**Node 1286 | CG Ferns | MRCA: *Psilotum-Adiantum* | 384.71 Ma – 451 Ma.**

**Fossil taxon and specimen.** *Ibyka amphikoma* was recovered from the Manorkill Shale Member at Schoharie Creek directly below the spillway of Gilboa dam, Gilboa, Schoharie County, New York, Gilboa [14].

**Phylogenetic justification.** *Ibyka amphikoma* [14] is the oldest record of the equisetopsid lineage based on the phylogenetic analyses undertaken by Kenrick and Crane [3].

**Minimum age.** 384.71 Ma.

**Maximum age.** 451 Ma.

**Age justification.** *Ibyka amphikoma* was recovered from the Manorkill Shale Member, which is a lateral equivalent of the Windom Member, within the Moscow Formation of New York [18, 19], which falls fully within the *ansatus* conodont Biozone [20, 21] the top of which is dated to 385.41 Ma  $\pm$  0.7 Myr, thus, yielding a minimum age constraint of 384.71 Ma. The soft maximum constraint, following Clarke et al. [1], is based on the oldest occurrences of trilete spores, known from the Qusaiba-1 core from the Quasim Formation of northern Saudi Arabia [8]. The very oldest records precede the earliest occurrences of the *A. barbata*, opening the possibility that they occur in the preceding *Tanuchitina fistulosa* biozone, though *T. fistulosa* does not occur. The oldest stratigraphic records within the core co-occur with the chitinozoan *Armoricochitina nigerica*, known to extend into the Caradoc, to within the biozone characterized by *Fungochitina spinifera* (= *Fungochitina fungiformis*) [9]. The base of the *F. spinifera* Zone falls within the *Dicranograptus clingani* Biozone (*Dicellograptus morrisoni* Subzone) [10], the base of which is estimated at 451 Ma [11]. Thus, we establish our soft maximum for Tracheophyta at 451 Ma.

**Discussion.** Magallón et al. [13] established a minimum age constraint based on *Ibyka amphikoma* using the Givetian-Frasnian boundary, for which they provided a date of 385 Ma, though this has since been revised to 382.7 Ma  $\pm$  1 Myr [17]. However, we provide a more detailed stratigraphic justification for the age of *I. amphikoma* which allows for an older minimum age constraint.

**Node 1287 | CG Lycophytes | MRCA: *Huperzia-Selaginella* | 392.1 Ma – 451 Ma.**

**Fossil taxon and specimen.** *Leclercquia complexa* [CW092 (07 – 061): Collections of the Centre for Palynological Studies, Department of Animal and Plant Sciences, University of Sheffield, UK], from Campbellton Formation outcropping on the south shore of the Restigouche River, between Dalhousie and Campbellton, New Brunswick, eastern Canada [190].

**Phylogenetic justification.** Kenrick and Crane [3] identified *Leclercquia complexa* as the oldest member of Isoetopsida and crown Lycopodiophyta. This interpretation is supported by spore characteristics analysed phylogenetically by Wellman et al. [190].

**Minimum age.** 392.1 Ma.

**Maximum age.** 451 Ma.

**Age justification.** A Late Emsian age is often cited for the New Brunswick occurrences of identified *Leclercquia complexa* and, indeed, the *Stockmensella-Leclercquia* macroplant Biozone spans all but the earliest Emsian [17]. However, Wellman et al. [190] attribute their own material of *Leclercquia complexa* to the middle of the *Emphanisporites annulatus* – *Camarozonotriletes sextantii* Spore Assemblage Biozone which falls within the early part of the Emsian. In either instance, the earliest records of *Leclercquia complexa* fall fully within the Emsian, the end of which is dated to 393.3 Ma  $\pm$  1.2 Myr [17], yielding a minimum constraint of 392.1 Ma. The soft maximum constraint, following Clarke et al. (2011), is based on the oldest occurrences of trilete spores, known from the Qusaiba-1 core from the Quasim Formation of northern Saudi Arabia [8]. The very oldest



records precede the earliest occurrences of the *A. barbata*, opening the possibility that they occur in the preceding *Tanuchitina fistulosa* biozone, though *T. fistulosa* does not occur. The oldest stratigraphic records within the core co-occur with the chitinozoan *Armoricochitina nigerica*, known to extend into the Caradoc, to within the Biozone characterized by *Fungochitina spinifera* (= *Fungochitina fungiformis*) [9]. The base of the *F. spinifera* Zone falls within the *Dicranograptus clingani* Biozone (*Dicellograptus morrissi* Subzone) [10], the base of which is estimated at 451 Ma [11]. Thus, we establish our soft maximum for Tracheophyta at 451 Ma. **Discussion.** Magallon et al. [13] cite a minimum age of 385 Ma, based on the Middle-Upper Devonian Boundary, but our more detailed stratigraphy allows for an older minimum age interpretation of *Leclercquia complexa*.

## Supplementary References

1. **Clarke J, Donoghue PCJ, Warnock RCM. 2011.** Establishing a timescale for plant evolution. *New Phytologist* **192**(1), 266-301.
2. **Kotyk ME, Basinger JF, Gensel PG, de Freitas TA. 2002.** Morphologically complex plant macrofossils from the Late Silurian of Arctic Canada. *American Journal of Botany* **89**(6), 1004-1013.
3. **Kenrick P, Crane PR. 1997.** *The origin and early diversification of land plants: a cladistic study.* Washington D.C., Smithsonian Institution Press.
4. **Klapper G, Murphy MA. 1974.** Silurian - lower Devonian conodont sequence in the Roberts Mountains Formation of central Nevada. *University of California Publications in Geological Sciences* **111**, 1-62.
5. **Thorsteinsson R. 1980.** Stratigraphy and conodonts of Upper Silurian and Lower Devonian rocks in the environs of the Boothia Uplift Canadian Arctic Archipelago. 1. Contributions to stratigraphy. *Geological Survey of Canada Bulletin* (292), VIII-38.
6. **Uyeno TT. 1990.** Biostratigraphy and conodont faunas of Upper Ordovician through Middle Devonian rocks, eastern Arctic Archipelago. *Geological Survey of Canada, Bulletin* **401**, 1-211.
7. **Mayr U, Brent TA, de Freitas T, Frisch T, Nowlan GS, Okulitch AV. 2004.** Geology of Eastern Prince of Wales Island and Adjacent Smaller Islands, Nunavut. *Geological Survey of Canada, Bulletin* **574**, 1-88.
8. **Stemans P, Le Herisse A, Melvin J, Miller MA, Paris F, Verniers J, Wellman CH. 2009.** Origin and Radiation of the Earliest Vascular Land Plants. *Science* **324**(5925), 353-353.
9. **Paris F, Le Herisse A, Monod O, Kozlu H, Ghienne J-F, Dean WT, Vecoli M, Gunay Y. 2007.** Ordovician chitinozoans and acritarchs from southern and southeastern Turkey. *Revue de micropaléontologie* **50**(1), 81-107.
10. **Vandenbroucke TRA, Williams M, Zalasiewicz JA, Davies JR, Waters RA. 2008.** Integrated Upper Ordovician graptolite-chitinozoan biostratigraphy of the Cardigan and Whitland areas, southwest Wales. *Geological Magazine* **145**, 199-214.
11. **Cooper RA, Sadler PM. 2012.** The Ordovician Period. In *Geologic timescale 2012* (eds. Gradstein FM, Ogg JG, Schmitz M, Ogg G), pp. 489-523, Elsevier.
12. **Bonamo PM. 1977.** *Rellimia Thomsonii* (Progymnospermopsida) from Middle Devonian of New York State. *American Journal of Botany* **64**(10), 1272-1285.
13. **Magallón S, Hilu KW, Quandt D. 2013.** Land plant evolutionary timeline: gene effects are secondary to fossil constraints in relaxed clock estimation of age and substitution rates. *Am J Bot* **100**(3), 556-573.
14. **Skog JE, Banks HP. 1973.** *Ibyka amphikoma*, gen et sp-n - new protoarticulate precursor from late Middle Devonian of New York State. *American Journal of Botany* **60**(4), 366-380.
15. **Bartholomew AJ, Brett CE. 2007.** Correlation of Middle Devonian Hamilton Group-equivalent strata in east-central North America: implications for eustasy, tectonics and faunal provinciality. *Geological Society, London, Special Publications* **278**(1), 105-131.
16. **Johnson JG, Klapper G, Sandberg CA 1985.** Devonian eustatic fluctuations in Euramerica. *Geological Society of America Bulletin* **96**(5), 567.
17. **Becker RT, Gradstein FM, Hammer O. 2012.** The Devonian Period. In *The geological timescale 2012* (eds. Gradstein F.M., Ogg J.G., Schmitz M., Ogg G.), pp. 559-601, Elsevier.
18. **Fisher DW., Isachsen YW., Rickard LV, Broughton JG, Offield TW. 1962.** *Geologic map of New York.* Albany, New York State Museum Science Service, Geological Survey.
19. **Rickard LV. 1964.** *Correlation of the Devonian rocks in New York State. Map and Chart Series 4.* Albany, New York State Museum Science Service Geological Survey.
20. **Klapper G. 1981.** Review of New York Devonian conodont biostratigraphy. In *Devonian biostratigraphy of New York, Part I* (eds. Oliver W.A., Jr., Klapper G.), pp. 57-68, IUGS SDS.
21. **Kirchgasser WT. 2000.** Correlation of stage boundaries in the Appalachian Devonian, Eastern United States. *Courier Forschungsinstitut Senckenberg* **225**, 271-284.

22. **Trivett ML 1992.** Growth, architecture, structure, and relationships of *Cordaixylon iowensis* nov comb (Cordaitales). *International Journal of Plant Sciences* **153**(2), 273-287.
23. **Janousek TJ, Pope JP. 2014.** Petrology, petrography and conodont biostratigraphy of the Ladysdale Coal interval, along Whitebreast Creek, Bauer, Iowa. *GSA North-Central Section, 48th Annual Meeting, Abstracts* **16-5**.
24. **Heckel PH. 2013.** Pennsylvanian stratigraphy of Northern Midcontinent Shelf and biostratigraphic correlation of cyclothem. *Stratigraphy* **10**, 3-39.
25. **Barrick JE, Lambert LL, Heckel PH, Rosscoe SJ, Boardman DR. 2013.** Midcontinent Pennsylvanian conodont zonation. *Stratigraphy* **10**, 55-72.
26. **Davydov VI, Korn D, Schmitz MD. 2012.** The Carboniferous Period. In *The geologic time scale 2012* (eds. Gradstein F.M., Ogg J.G., Schmitz M., Ogg G.), pp. 603-651, Elsevier.
27. **Prestianni C. 2005.** Early diversification of seeds and seed-like structures. *Carnets De Geologie*, 33-38.
28. **Rothwell GW, Scheckler SE, Gillespie WH. 1989.** *Elkinsia* gen nov, a late Devonian gymnosperm with cupulate ovules. *Botanical Gazette* **150**(2), 170-189.
29. **Streel M, Scheckler SE. 1990.** Miospore lateral distribution in upper Fammenian alluvial lagoonal to tidal facies from eastern United States and Belgium. *Review of Palaeobotany and Palynology* **64**(1-4), 315-324.
30. **Streel M, Higgs K, Loboziak S, Riegel W, Steemans P. 1987.** Spore stratigraphy and correlation with faunas and floras in the type marine Devonian of the Ardenne-Rhenish regions. *Review of Palaeobotany and Palynology* **50**(3), 211-229.
31. **House MR., Gradstein FM. 2004.** The Devonian Period. In *A geologic timescale 2004* (eds. Gradstein FM, Ogg JG, Smith AG), pp. 202-221. Cambridge, Cambridge University Press.
32. **Hughes NF, McDougall AB. 1990.** Barremian-Aptian angiosperm pollen records from southern England. *Review of Palaeobotany and Palynology* **65**(1-4), 145-151.
33. **Judd WS, Olmstead RG. 2004.** A survey of tricolpate (eudicot) phylogenetic relationships. *American Journal of Botany* **91**(10), 1627-1644.
34. **Ogg JG., Hinnov LA. 2012.** Cretaceous. In *The geologic time scale 2012* (eds. Gradstein FM, Ogg JG, Schmitz M, Ogg G), pp. 793-853, Elsevier.
35. **Ogg JG. 2012.** Triassic. In *The geologic time scale 2012* (eds. Gradstein FM, Ogg JG, Schmitz M, Ogg G), pp. 681-730, Elsevier.
36. **Liu ZJ, Wang X. 2016.** A perfect flower from the Jurassic of China. *Hist Biol* **28**(5), 707-719.
37. **Han G, Liu Z, Liu X, Mao L, Jacques FMB., Wang X. 2016.** A whole plant herbaceous angiosperm from the Middle Jurassic of China. *Acta Geologica Sinica* **90**, 19-29.
38. **Liu Z-J, Wang X. 2016.** Yuhania: a unique angiosperm from the Middle Jurassic of Inner Mongolia, China. *Historical Biology*, 1-11.
39. **Dilcher DL., Sun G, Ji Q, Li HQ. 2007.** An early infructescence *Hyracantha decussata* (comb. nov.) from the Yixian Formation in northeastern China. *Proceedings of the National Academy of Sciences of the United States of America* **104**(22), 9370-9374.
40. **Wang W, Dilcher DL, Sun G, Wang H-S, Chen Z-D. 2016.** Accelerated evolution of early angiosperms: Evidence from ranunculalean phylogeny by integrating living and fossil data. *Journal of Systematics and Evolution* **54**(4), 336-341.
41. **Chang S-C., Zhang H, Hemming SR, Mesko GT, Fang Y. 2012.** Chronological evidence for extension of the Jehol Biota into Southern China. *Palaeogeography, Palaeoclimatology, Palaeoecology* **344-345**(0), 1-5.
42. **He HY, Wang XL, Zhou ZH, Wang F, Boven A, Shi G.H, Zhu RX. 2004.** Timing of the Jiufotang Formation (Jehol Group) in Liaoning, northeastern China, and its implications. *Geophysical Research Letters* **31**, 1-4.
43. **Jaramillo CA., Dilcher DL. 2001.** Middle Paleogene palynology of Central Colombia, South America: A study of pollen and spores from tropical latitudes. *Palaeontographica Abteilung B* **258**(4-6), 87-213.
44. **Germeraad JH., Hopping CA., Muller J. 1968.** Palynology of Tertiary sediments from tropical areas. *Review of Palaeobotany and Palynology* **6**, 189-348.
45. **Davis CC, Schaefer H, Xi Z, Baum D.A, Donoghue MJ, Harmon LJ. 2014.** Long-term morphological stasis maintained by a plant-pollinator mutualism. *Proceedings of the National Academy of Sciences of the United States of America* **111**(16), 5914-5919.
46. **Jaramillo CA, Rueda M, Torres V. 2010.** A palynological zonation for the Cenozoic of the Llanos and Llanos foothills of Colombia. *Palynology* **35**(1), 46-84.
47. **Boucher LD, Manchester SR, Judd WS. 2003.** An extinct genus of Salicaceae based on twigs with attached flowers, fruits, and foliage from the Eocene Green River Formation of Utah and Colorado, USA. *American Journal of Botany* **90**(9), 1389-1399.

48. **Manchester SR., Judd WS., Handley B. 2006.** Foliage and fruits of early poplars (Salicaceae: *Populus*) from the Eocene of Utah, Colorado, and Wyoming. *International Journal of Plant Sciences* **167**(4), 897-908.
49. **Smith ME, Carroll AR., Singer BS. 2008.** Synoptic revision of a major ancient lake system: Eocene Green River Formation, western United States. *GSA Bulletin* **120**, 54-84.
50. **Vandenbergh N, Hilgen FJ, Speijer RP. 2012.** The Paleogene Period. In *The geologic timescale 2012* (eds. Gradstein F.M., Ogg J.G., Schmitz M., Ogg G.), pp. 855-921. Amsterdam, Elsevier.
51. **Crepet WL, Nixon KC. 1998.** Fossil Clusiaceae from the Late Cretaceous (Turonian) of New Jersey and implications regarding the history of bee pollination. *American Journal of Botany* **85**(8), 1122-1133.
52. **Ruhfel BR, Stevens PF, Davis CC. 2013.** Combined Morphological and Molecular Phylogeny of the Clusioid Clade (Malpighiales) and the Placement of the Ancient Rosid Macrofossil *Paleoclusia*. *International Journal of Plant Sciences* **174**(6), 910-936.
53. **Massoni J, Doyle JA., Sauquet H. 2014.** Fossil calibration of Magnoliidae, an ancient lineage of angiosperms. *Palaeontologica Electronica*.
54. **Dettmann ME, Playford G. 1968.** Taxonomy of some Cretaceous spores and pollen grains from Eastern Australia. *Proceedings of the Royal Society of Victoria* **81**, 69-83.
55. **Sauquet H, Ho SY, Gandolfo MA, Jordan GJ, Wilf P, Cantrill DJ, Bayly MJ, Bromham L, Brown GK, Carpenter RJ, et al. 2012.** Testing the impact of calibration on molecular divergence times using a fossil-rich group: the case of *Nothofagus* (Fagales). *Syst Biol* **61**(2), 289-313.
56. **Partridge AD. 2006.** Late Cretaceous — Cenozoic palynology zonation Gippsland Basin. In *Australian Mesozoic and Cenozoic Palynology Zonations – updated to the 2004 Geologic Time Scale Geoscience Australia Record 2006/23* (ed. Monteil E), Geoscience Australia Record.
57. **Manchester SR, Dillhoff RM. 2004.** *Fagus* (Fagaceae) fruits, foliage, and pollen from the Middle Eocene of Pacific Northwestern North America. *Canadian Journal of Earth Sciences* **82**, 1509-1517.
58. **Renner SS., Grimm GW, Kapli P, Denk T. 2016.** Species relationships and divergence times in beeches: new insights from the inclusion of 53 young and old fossils in a birth-death clock model. *Philosophical transactions of the Royal Society of London Series B, Biological sciences* **371**(1699).
59. **Ewing TE. 1981.** Regional stratigraphy and structural setting of the Kamloops Group, South-central British Columbia. *Canadian Journal of Earth Sciences* **18**, 1464-1477.
60. **Moss PT, Greenwood DR, Archibald SB. 2005.** Regional and local vegetation community dynamics of the Eocene Okanagan Highlands (British Columbia – Washington State) from palynology. *Canadian Journal of Earth Sciences* **42**(2), 187-204.
61. **Pigg KB, DeVore Melanie L, Wojciechowski MF. 2008.** *Paleosecuridaca curtisii* gen. et sp. nov., *Securidaca*-like Samaras (Polygalaceae) from the Late Paleocene of North Dakota and their significance to the divergence of families within the Fabales. *International Journal of Plant Sciences* **169**(9), 1304-1313.
62. **Crane PR, Manchester SR, Dilcher DL 1990.** A preliminary survey of fossil leaves and well-preserved reproductive structures from the Sentinel Butte Formation (Paleocene) near Almont, North Dakota. *Fieldiana Geology* **20**(1418).
63. **Zetter R, Farabee MJ, Pigg KB, Manchester SR, DeVore ML., Nowak MD. 2011.** Palynoflora of the late Paleocene silicified shale at Almont, North Dakota, USA. *Palynology* **35**(2), 179-211.
64. **McClain AM, Manchester SR. 2001.** Dipteronia (Sapindaceae) from the Tertiary of North America and Implications for the Phytogeographic History of the Aceroideae. *American Journal of Botany* **88**(7), 1316-1325.
65. **Qiu YL, Li LB, Wang B, Chen ZD, Dombrowska O, Lee J, Kent L, Li RQ, Jobson RW, Hendry TA, et al. 2007.** A nonflowering land plant phylogeny inferred from nucleotide sequences of seven chloroplast, mitochondrial, and nuclear genes. *International Journal of Plant Sciences* **168**(5), 691-708.
66. **Manchester SR, Chen Z-D, Lu A-M, Uemura K. 2009.** Eastern Asian endemic seed plant genera and their paleogeographic history throughout the Northern Hemisphere. *Journal of Systematics and Evolution* **47**(1), 1-42.
67. **Nichols DJ, Ott HL. 1978.** Biostratigraphy and evolution of the *Momipites-Caryapollenites* lineage in the early Tertiary in the Wind River Basin, Wyoming. *Palynology* **2**, 93-112.
68. **Peppe DJ. 2010.** Megafloral change in the early and middle Paleocene in the Williston Basin, North Dakota, USA. *Palaeogeography, Palaeoclimatology, Palaeoecology* **298**, 224-234.
69. **Corbett SL, Manchester SR. 2004.** Phytogeography and Fossil History of *Ailanthus* (Simaroubaceae). *International Journal of Plant Sciences* **165**(4), 671-690.
70. **Takahashi M, Crane PR, Ando H. 1999.** *Esgueiria futabensis* sp. nov., a new angiosperm flower from the Upper Cretaceous (lower Coniacian) of northeastern Honshu, Japan. *Paleontological Research* **3**, 81-87.

71. Friis EM., Pedersen KR., Crane PR. 2006. Cretaceous angiosperm flowers: Innovation and evolution in plant reproduction. *Palaeogeography, Palaeoclimatology, Palaeoecology* **232**(2-4), 251-293.
72. Yazykova E. 2002. Ammonite and inoceramid radiations after the Santonian–Campanian bioevent in Sakhalin, Far East Russia. *Lethaia* **35**, 51-60.
73. Manchester SR, Kappate DK, Wen J. 2013. Oldest fruits of the grape family (Vitaceae) from the Late Cretaceous Deccan Cherts of India. *American Journal of Botany* **100**(9), 1849-1859.
74. Schoene B, Samperton KM, Eddy MP., Keller G, Adatte T, Bowring SA, Khadri SFR., Gertsch B. 2015. U-Pb geochronology of the Deccan Traps and relation to the end-Cretaceous mass extinction. *Science* **347**, 182-184.
75. Hermsen EJ, Gandolfo MA, Nixon K.C, Crepet WL. 2003 *Divisestylus* gen. nov. (aff. Iteaceae), a fossil saxifrage from the Late Cretaceous of New Jersey, USA. *American Journal of Botany* **90**, 1371-1388.
76. Magallón S, Herendeen PS., Crane PR. 2001. Androdecidua endressii gen. et sp. nov., from the Late Cretaceous of Georgia (United States): Further Floral Diversity in Hamamelidoideae (Hamamelidaceae). *International Journal of Plant Sciences* **162**(4), 963-983.
77. Sims HJ, Herendeen PS., Crane PR. 1998. New Genus of Fossil Fagaceae from the Santonian (Late Cretaceous) of Central Georgia, U. S. A. *International Journal of Plant Sciences* **159**(2), 391-404.
78. Manchester SR, Donoghue MJ. 1995. Winged fruits of Linnaeae (Caprifoliaceae) in the Tertiary of western North America: *Diplodipelta* gen. nov. *International Journal of Plant Sciences* **156**(5), 709-722.
79. Bell CD, Donoghue MJ. 2005. Dating the dipsacales: Comparing models, genes, and evolutionary implications. *American Journal of Botany* **92**(2), 284-296.
80. Evanoff E, McIntosh WC, Murphey PC. 2001. Stratigraphic summary and 40Ar/39Ar geochronology of the Florissant Formation, Colorado. In *Fossil flora and stratigraphy of the florissant Formation, Colorado: Proceedings of the Denver Museum of Nature & Science, ser 4, no 1, p 1-16* (eds. Evanoff E, Gregory-Wodzicki KM. Johnson KR), pp. 1-16. Denver, Denver Museum of Nature & Science.
81. Prothero DR. 2008. Magnetic stratigraphy of the Eocene-Oligocene floral transition in western North America. In Meyer, Il. W., and Smith, D. M., eds., *Paleomology of the Upper Eocene Florissant Formation, Colorado. Geological Society of America Special Paper 435*, 71-87.
82. Martínez-Millán M. 2010. Fossil record and age of the Asteridae. *Botanical Review* **76**, 83-135.
83. Taylor D.W. 1989. Select palynomorphs from the Middle Eocene Claiborne Formation, Tenn., (U.S.A.). *Review of Palaeobotany and Palynology* **58**(2-4), 111-128.
84. Elsik WC. 1974. Characteristic Eocene palynomorphs in the Gulf Coast, U.S.A. *Palaeontographica Abteilung B* **149**, 90-111.
85. Zavada M, de Villiers S. 2000. Pollen of the Asteraceae from the Paleocene-Eocene of South Africa. *Grana* **39**(1), 39-45.
86. Wade BS., Pearson PN, Berggren WA, Pälike H. 2011. Review and revision of Cenozoic tropical planktonic foraminiferal biostratigraphy and calibration to the geomagnetic polarity and astronomical time scale. *Earth-Science Reviews* **104**(1-3), 111-142.
87. Mai DH. 1970. Neue Arten aus tertiären Lorbeerwäldern in Mitteleuropa (Vorläufige Mitteilung). *Feddes Repertorium* **98**, 347-370.
88. Mai DH. 1987. Neue Früchte und Samen aus paläozänen Ablagerungen Mitteleuropas. *Feddes Repertorium* **98**, 197-229.
89. Knobloch EN, Mai DH. 1986. *Monographie der Früchte und Samen in der Kreide von Mitteleuropa*. Prague, Ústřední ústav geologický v Academii, nakl. Československé akademie věd.
90. Knobloch E, Kvaček Z, Bůžek Č, Mai DH, Batten DJ. 1993. Evolutionary significance of floristic changes in the Northern Hemisphere during the Late Cretaceous and Palaeogene, with particular reference to Central Europe. *Review of Palaeobotany and Palynology* **78**(1-2), 41-54.
91. Berry EW. 1930. Revision of the Lower Eocene Wilcox Flora of the southeastern states with descriptions of new species, chiefly from Tennessee and Kentucky. *United States Geological Survey Professional Paper* **156**, 1-196.
92. Millan M, Crepet WL. 2014. The fossil record of the Solanaceae revisited and revised—the fossil record of Rhamnaceae enhanced. *Botanical Review* **80**, 73-106.
93. Crepet WL., Nixon KC, Daghlian CP. 2012. Fossil Ericales from the Upper Cretaceous of New Jersey. *International Journal of Plant Sciences* **174**, 572-584.
94. Gandolfo MA., Nixon KC., Crepet WL. 1988. *Tylerianthus crossmanensis* gen. et sp. nov. (Rosales) from the Upper Cretaceous of New Jersey. *American Journal of Botany* **85**, 376-386.
95. Gandolfo MA, Nixon KC., Crepet WL 1998. A new fossil flower from the Turonian of New Jersey: *Dressiantha bicarpellata* gen. et sp. nov. (Capparales). *American Journal of Botany* **85**(7), 964-974.



96. **Crepet WL., Nixon KC., Gandolfo MA. 2004.** Fossil evidence and phylogeny: The age of major angiosperm clades based on mesofossil and macrofossil evidence from Cretaceous deposits. *American Journal of Botany* **91**(10), 1666-1682.
97. **Drinnan AN, Crane PR, Friis EM, Pedersen KR. 1991.** Angiosperm flowers and tricolpate pollen of buxaceous affinity from the Potomac Group (mid-Cretaceous) of eastern North America. *American Journal of Botany* **78**, 153-176.
98. **Doyle JA. 2015.** Recognising angiosperm clades in the Early Cretaceous fossil record. *Historical Biology* **27**(3-4), 414-429.
99. **Hochuli PA., Heimhofer U, Weissert H. 2006.** Timing of early angiosperm radiation: recalibrating the classical succession. *Journal of the Geological Society* **163**, 587-594.
100. **Crane PR, Pedersen KR, Friis EM, Drinnan AN. 1993.** Early Cretaceous (early to middle Albian) platanoid inflorescences associated with Sapindopsis leaves from the Potomac Group of eastern North America. *Systematic Botany* **18**, 328-344.
101. **Jacques FMB., Wang W, CORD, Li H-L., Zhou Z-K., Chen Z-D. 2010.** Integrating fossils in a molecular-based phylogeny and testing them as calibration points for divergence time estimates in Menispermaceae. *Journal Systematics and Evolution* **49**, 25-49.
102. **Pacltová B. 1981.** The evolution and distribution of *Normapolles* pollen during the Cenophytic. *Review of Palaeobotany & Palynology* **35**, 175-208.
103. **Knobloch E. 1985.** Paläobotanisch-biostratigraphische Charakteristik der Klikov-Schichtenfolge (Oberturon–Santon) in Südböhmen. *Sbornik geologických věd, Geologie* **40**, 101–145.
104. **Doyle JA, Endress PK, Upchurch GR. Jr. 2008.** Early Cretaceous monocots: a phylogenetic evaluation. *Sbornik Narodniho Muzea v Praze Rada B Prirodni Vedy* **64**(2-4), 59-87.
105. **Hughes NF. 1994.** *The enigma of angiosperm origins*. Cambridge, Cambridge University Press.
106. **Hertweck KL, Kinney MS, Stuart SA, Maurin O, Mathews S, Chase MW, Gandolfo MA, Pires JC. 2015.** Phylogenetics, divergence times and diversification from three genomic partitions in monocots. *Botanical Journal of the Linnean Society* **178**(3), 375-393.
107. **Friis EM. 1988.** *Spirematospermum chandlerae* sp. nov., an extinct species of Zingiberaceae from the North American Cretaceous. *Tertiary Research* **9**, 7-12.
108. **Christopher RA, Prowell DC 2010.** A palynological biozonation for the uppermost Santonian and Campanian Stages (Upper Cretaceous) of South Carolina, USA. *Cretaceous Research* **31**(2), 101-129.
109. **Berry EW. 1914.** The Upper Cretaceous and Eocene floras of South Carolina and Georgia. *United States Geological Survey Professional Paper* **84**, 1-200.
110. **Iles WJD, Smith SY, Gandolfo MA, Graham SW. 2015.** Monocot fossils suitable for molecular dating analyses. *Botanical Journal of the Linnean Society* **178**(3), 346-374.
111. **Sohl NF, Owens JP. 1991.** Cretaceous stratigraphy of the Carolina Coastal Plain. In *The Geology of the Carolinas: Knoxville* (eds. Horton J.W., Jr., Zullo V.A.), pp. 191-220, University of Tennessee Press.
112. **Campbell BG, Gohn GS. 1994.** Stratigraphic framework for geologic and geohydrologic studies of the subsurface Cretaceous section near Charleston, South Carolina. *United States Geological Survey Map MF-2273*, 1-11.
113. **Habib D, Miller JA. 1989.** Dinoflagellate species and organic facies evidence of marine transgression and regression in the Atlantic coastal plain. *Palaeogeography, Palaeoclimatology, Palaeoecology* **74**(1-2), 23-47.
114. **Ramirez SR, Gravendeel B, Singer RB., Marshall CR., Pierce NE. 2007.** Dating the origin of the Orchidaceae from a fossil orchid with its pollinator. *Nature* **448**(7157), 1042-1045.
115. **Iturralde-Vinent MA., MacPhee RDE. 1996.** Age and paleogeographical origin of Dominican Amber. *Science* **273**, 1850-1852.
116. **Conran JG., Bannister JM, Mildenhall DC, Lee DE, Chacon J, Renner SS. 2014.** Leaf fossils of *Luzuriaga* and a monocot flower with in situ pollen of *Liliacidites contortus* Mildenh. & Bannister sp. nov. (Alstroemeriaceae) from the Early Miocene. *Am J Bot* **101**(1), 141-155
117. **Lindqvist JK, Lee DE. 2009.** High-frequency paleoclimate signals from Foulden Maar, Waipiata Volcanic Field, southern New Zealand: an early Miocene varved lacustrine diatomite deposit. *Sedimentary Geology* **222**, 98-110.
118. **Mildenhall DC., Kennedy EM, Lee DE, Kaulfuss U, Bannister JM, Fox B, Conran JG. 2014.** Palynology of the early Miocene Foulden Maar, Otago, New Zealand: Diversity following destruction. *Review of Palaeobotany and Palynology* **204**(0), 27-42.
119. **Cooper RA. 2004.** The New Zealand geological timescale. *Institute of Geological and Nuclear Sciences Monograph* **22**, 1-284.
120. **Hilgen FJ., Lourens LJ, Van Dam JA. 2012.** The Neogene Period. In *The Geologic Times Scale 2012* (eds. Gradstein F.M., Ogg J.G., Schmitz M., Ogg G.), pp. 923-978, Elsevier.

121. **Gandolfo MA., Nixon K.C, Crepet WL. 2002.** Triuridaceae fossil flowers from the Upper Cretaceous of New Jersey. *American Journal of Botany* **89**(12), 1940-1957.
122. **Friis EM, Pedersen KR, Crane PR. 2004.** Araceae from the Early Cretaceous of Portugal: Evidence on the emergence of monocotyledons. *Proceedings of the National Academy of Sciences of the United States of America* **101**(47), 16565-16570.
123. **Friis EM, Pedersen KR, Crane PR. 2010.** Diversity in obscurity: fossil flowers and the early history of angiosperms. *Philosophical Transactions of the Royal Society B: Biological Sciences* **365**, 369-382.
124. **Dinis JL, Rey J, Cunha PP, Callapez P, dos Reis RP. 2008.** Stratigraphy and allogenic controls of the western Portugal Cretaceous: an updated synthesis. *Cretaceous Research* **29**(5-6), 772-780.
125. **Berthou PY. 1973.** Le Cénomaniien de l'Estremadure portugaise. *Memória, Serviços Geológicos de Portugal, Lisboa, NS* **23**, 169.
126. **Berthou PY. 1984.** Résumé synthétique de la stratigraphie et de la paléogéographie du Cretacé moyen et supérieur du bassin occidental portugais. *Geonovas* **7**, 99-120.
127. **Riley MG., Stockey RA. 2004.** *Cardstonia tolmanii* gen. et sp. nov. (Limnocharitaceae) from the Upper Cretaceous of Alberta, Canada. *International Journal of Plant Sciences* **165**(5), 897-916.
128. **Eberth DA., Braman DR. 2012.** A revised stratigraphy and depositional history for the Horseshoe Canyon Formation (Upper Cretaceous), southern Alberta plains. *Canadian Journal of Earth Sciences* **49**, 1053-1086.
129. **Bogner J, Johnson KR, Kvacek Z, Upchurch Jr. GR. 2007.** New fossil leaves of Araceae from the Late Cretaceous and Paleogene of western North America. *Zitteliana* **A47**, 133-147.
130. **Kvaček J, Herman AB. 2004.** Monocotyledons from the Early Campanian (Cretaceous) of Grünbach, Lower Austria. *Review of Palaeobotany and Palynology* **128**(3-4), 323-353.
131. **Nauheimer L, Metzler D, Renner SS. 2012.** Global history of the ancient monocot family Araceae inferred with models accounting for past continental positions and previous ranges based on fossils. *New Phytologist* **195**(4), 938-950.
132. **Herman AB, Kvaček J. 2010.** *Late Cretaceous Grünbach Flora of Austria*. Vienna, Naturhistorisches Museum Wien.
133. **Friis EM, Eklund H, Pedersen KR., Crane PR. 1994.** *Virginianthus calycanthoides* gen. et sp. nov.—A calycanthaceous flower from the Potomac Group (Early Cretaceous) of eastern North America. *International Journal of Plant Sciences* **155**, 772-785.
134. **Doyle JA., Endress PK. 2010.** Integrating Early Cretaceous fossils into the phylogeny of living angiosperms: Magnoliidae and eudicots. *Journal of Systematics and Evolution* **48**(1), 1-35.
135. **von Balthazar M, Crane PR, Pedersen KR, Friis EM. 2011.** New flowers of Laurales from the Early Cretaceous (Early to Middle Albian) of eastern North America. In *Flowers on the tree of life* (eds. Wanntorp L., Ronse De Craene L.P.), pp. 49-87. Cambridge Cambridge University Press.
136. **Doyle JA, Robbins EI. 1977.** Angiosperm pollen zonation of the continental Cretaceous of the Atlantic coastal plain and its application to deep wells in the Salisbury Embayment. *Palynology* (1), 43-78.
137. **Mohr B.A.R., Bernardes-de-Oliveira M.E.C. 2004** Endressinia brasiliana, a magnolialean angiosperm from the lower Cretaceous Crato Formation (Brazil). *International Journal of Plant Sciences* **165**(6), 1121-1133.
138. **Mohr BAR, Coiffard C, Bernardes-de-Oliveira MEC. 2013.** Schenkeriphyllum glanduliferum, a new magnolialean angiosperm from the Early Cretaceous of Northern Gondwana and its relationships to fossil and modern Magnoliales. *Review of Palaeobotany and Palynology* **189**, 57-72.
139. **Sauquet H, Doyle JA, Scharaschkin T, Borsch T, Hilu K.W, Chatrou L.W, Le Thomas A. 2003.** Phylogenetic analysis of Magnoliales and Myristicaceae based on multiple data sets: implications for character evolution. *Botanical Journal of the Linnean Society* **142**, 125-186.
140. **Batten DJ. 2007.** Spores and pollen from the Crato Formation: biostratigraphic and palaeoenvironmental implications. In *The Crato fossil beds of Brazil - window into an ancient world* (eds. Martill D.M., Bechly G., Loveridge R.F.), pp. 566-573. Cambridge, Cambridge University Press.
141. **Martill DM. 2007.** The age of the Cretaceous Santana Formation fossil Konservat Lagerstätten of north-east Brazil: a historical review and an appraisal of the biochronostratigraphic utility of its palaeobiota. *Cretaceous Research* **28**(6), 895-920.
142. **Heimhofer U, Hochuli P-A. 2010.** Early Cretaceous angiosperm pollen from a low-latitude succession (Araripe Basin, NE Brazil). *Review of Palaeobotany & Palynology* **161**(3-4), 105-126.
143. **Friis EM., Pedersen KR., Crane PR. 1995.** *Appomattoxia ancistrophora* gen et sp nov, a new Cretaceous plant with similarities to Circaeaster and extant Magnoliidae. *American Journal of Botany* **82**(7), 933-943.
144. **Friis E.M, Pedersen KR., Crane PR. 2010.** Cretaceous diversification of angiosperms in the western part of the Iberian Peninsula. *Review of Palaeobotany and Palynology* **162**(3), 341-361.

145. **Smith SY, Stockey A. 2007.** Establishing a fossil record for the perianthless Piperales: *Saururus tuckerae* sp. nov. (Saururaaceae) from the Middle Eocene Princeton Chert. *American Journal of Botany* **94**, 1642–1657.
146. **Rouse GE, Mathews W. 1961,** Radioactive dating of Tertiary plant-bearing deposits. *Science* **133**, 1079–1080.
147. **Mathews WH. 1964.** Potassium-argon age determinations of Cenozoic volcanic rocks from British Columbia. *Geological Society of America Bulletin* **75**, 465–468.
148. **Hills LV, Baadsgaard H. 1967.** Potassium-argon dating of some Lower Tertiary strata in British Columbia. *Bulletin of Canadian Petroleum Geology* **15**, 138–149.
149. **Read PB. 2000.** Geology and industrial minerals of the Tertiary basins, south-central British Columbia. *British Columbia Geological Survey Geo-File* **2000**(3).
150. **Moss P.T, Greenwood DR., Archibald SB. 2005.** Regional and local vegetation community dynamics of the Eocene Okanagan Highlands (British Columbia – Washington State) from palynology. *Canadian Journal of Earth Sciences* **42**, 187–204.
151. **Hughes NF, Drewry G, Laing J.F. 1979.** Barremian earliest angiosperm pollen. *Palaeontology* **22**, 513–535.
152. **Friis EM., Pedersen KR., Crane PR. 2000.** Fossil floral structures of a basal angiosperm with monocolpate, reticulate-acolumellate pollen from the Early Cretaceous of Portugal. *Grana* **39**, 226–239.
153. **Doyle JA., Endress PK. 2014.** Integrating Early Cretaceous Fossils into the Phylogeny of Living Angiosperms: ANITA Lines and Relatives of Chloranthaceae. *International Journal of Plant Sciences* **175**(5), 555–600.
154. **Rocha RB., Manuppella G, Mouterde R, Ruget C, Zbyszewski G. 1981.** *Carta geológica de Portugal na escala de 1/50 000. Notícia explicativa da folha 19-C Figueria da Foz.* Lisboa, Serviços Geológicos de Portugal.
155. **Manuppella G, Telles Antunes M, Costa Almedia CA, Azeredo AC, Barbosa B, Cardosa JL., Crispim JA., Duarte LV., Henriques MH., Martins LT., et al. 2000.** *Carta geológica de Portugal na escala de 1:50 000. Notícia explicativa da folha 27-A (Vila Nova de Ourém).* Lisboa, Instituto Geológico e Mineiro; 156 p.
156. **Dinis JL. 2001.** Definição da Formação da Figueira da Foz-Aptiano a Cenomaniano do sector central da margem oesteibérica. *Comunicações Instituto Geológico e Mineiro* **88**, 127–160.
157. **Callapez P. 2003.** The Cenomanian-Turonian transition in West Central Portugal: ammonites and biostratigraphy. *Ciências da Terra* **15**, 53–70.
158. **Frumin S, Friis EM. 1999.** Magnoliid reproductive organs from the Cenomanian-Turonian of north-western Kazakhstan: Magnoliaceae and Illiciaceae. *Plant Systematics and Evolution* **216**(3–4), 265–288.
159. **Levina AP, Zhelezko VI, Leiptsig AB, Papulov GN, Ponomarenko ZK, Paskar ZS. 1990.** The Sokolov and Sarbay ironmine quarries. In *Upper Cretaceous deposits of the southern Transural (The region of the upper current of the Tobol River)* (eds. Papulov G.N., Zhelezko V.I., Levina A.R.), pp. 46–58. Sverdlovsk, Akademia Nauk SSSR.
160. **Korchagin OA, Bragina LG., Bragin NY. 2012.** Planktonic foraminifers and radiolarians from the Coniacian-santonian deposits of the Mt. Ak-Kaya, Crimean Mountains, Ukraine. *Stratigraphy and Geological Correlation* **20**(1), 73–96.
161. **Mohr BAR., Bernardes-De-Oliveira MEC, Taylor DW. 2008.** Pluricarpellata, a nymphaealean angiosperm from the Lower Cretaceous of northern Gondwana (Crato Formation, Brazil). *Taxon* **57**(4), 1147–1158.
162. **Taylor DW., Brenner GJ., Basha SH. 2008.** Scutifolium jordanicum gen. et sp nov (Cabombaceae), an aquatic fossil plant from the Lower Cretaceous of Jordan, and the relationships of related leaf fossils to living genera. *American Journal of Botany* **95**(3), 340–352.
163. **Friis E.M, Pedersen KR., Crane PR. 2001.** Fossil evidence of water lilies (Nymphaeales) in the Early Cretaceous. *Nature* **410**(6826), 357–360.
164. **Friis EM, Pedersen KR, Von Balthazar M, Grimm G.W, Crane PR. 2009.** Monetianthus mirus gen. et sp. nov., a nymphaealean flowers from the Early Cretaceous of Portugal. *International Journal of Plant Science* **170**, 1086–1101.
165. **Smith SA., Beaulieu JM., Donoghue MJ. 2010.** An uncorrelated relaxed-clock analysis suggests an earlier origin for flowering plants. *Proceedings of the National Academy of Sciences* **107**(13), 5897–5902.
166. **Zanne AE., Tank DC., Cornwell WK, Eastman JM., Smith SA., FitzJohn RG, McGlenn DJ, O'Meara BC, Moles AT., Reich PB., et al. 2014.** Three keys to the radiation of angiosperms into freezing environments. *Nature* **506**(7486), 89–92.

167. **Amireh BS., Jarrar G, Henjes-Kunst F, Schneider W. 1998.** K-Ar dating, X-ray diffractometry, optical and scanning electron microscopy of glauconites from the Early Cretaceous Kurnub. *Geological Journal* **33**, 49-65.
168. **Wieland GW. 1935.** The Cerro Cuadrado petrified forest. *Carnegie Institution of Washington Publication* **449**, 1-183.
169. **Calder MG. 1953.** A coniferous petrified forest in Patagonia. *Bulletin of the British Museum (Natural History): Geology* **2**, 99-138.
170. **Stockey RA. 1975.** Seeds and embryos of *Araucaria mirabilis*. *American Journal of Botany* **62**(8), 856-868.
171. **Stockey RA. 1978.** Reproductive biology of Cerro Cuadrado fossil conifers: Ontogeny and reproductive strategies in *Araucaria mirabilis* (Spegazzini) Windhausen. *Palaeontographica Abteilung B* **166**, 1-15.
172. **Wilde MH., Eames AJ. 1948.** The ovule and seed of *Araucaria badwillii* with discussion of the taxonomy of the genus. 1. Morphology. *Annals of botany* **12**(47), 311-&.
173. **Spalleti L, Iñiguez Rodríguez AM, Masón M. 1982.** Edades radimétricas de piroclastitas y volvanitas del Grupo Bahía Laura, Gran Bajo de San Julián, Santa Cruz. *Revista de la Asociación Geológica Argentina* **37**, 483-485.
174. **Florin R. 1951.** Evolution in cordaites and conifers. *Acta Horti Bergiani* **15**, 285-388.
175. Yao X.L., Taylor T.N., Taylor E.L. 1997 A taxodiaceous seed cone from the Triassic of Antarctica. *American Journal of Botany* **84**(3), 343-354.
176. **Axsmith BJ., Taylor TN, Taylor EL. 1998.** Anatomically preserved leaves of the conifer *Notophytum krauselii* (Podocarpaceae) from the Triassic of Antarctica. *American Journal of Botany* **85**(5), 704-713.
177. **Krassilov VA. 1986.** New floral structure from the Lower Cretaceous of Lake Baikal Area. *Review of Palaeobotany and Palynology* **47**, 9-16.
178. **Rydin C, Pedersen KR, Friis EM. 2004.** On the evolutionary history of *Ephedra*: Cretaceous fossils and extant molecules. *Proceedings of the National Academy of Sciences, USA* **101**, 16571-16576.
179. **Friis EM., Pedersen KR., Crane PR. 2009.** Early Cretaceous mesofossils from Portugal and eastern North America related to the Bennettitales-Erdtmanithecales-Gnetales group. *American Journal of Botany* **96**, 252-283.
180. **Godefroit P. 2012.** *Bernissart dinosaurs and Early Cretaceous terrestrial ecosystems*. Bloomington, IN, Indiana University Press; 648 p.
181. **Vakhrameev V, Kotova I. 1977.** Ancient angiosperms and accompanying plants from the Lower Cretaceous of Transbaikalia. *Paleontological Journal* **4**, 487-495.
182. **Vakhrameev V. 1991.** *Jurassic and Cretaceous floras and climates of the Earth*. Cambridge, Cambridge University Press; 318 p.
183. **Chen P, Wang Q, Zhang H, Cao M, Li W, Wu S, Shen Y. 2005.** Jianshangou Bed of the Yixian Formation in West Liaoning, China. *Science in China Series D: Earth Sciences* **48**(3), 298-312.
184. **Dettmann ME., Thomson MRA. 1987.** Cretaceous palynomorphs from the James-Ross Island area, Antarctica - a pilot-study. *British Antarctic Survey Bulletin* **77**, 13-59.
185. **Gao Z, Thomas BA. 1989.** A review of fossil cycad megasporophylls, with new evidence of *Crossozamia pomel* and its associated leaves from the lower Permian of Taiyuan, China. *Review of Palaeobotany and Palynology* **60**, 205-223.
186. **Nagalingum NS, Marshall CR, Quental TB, Rai HS, Little DP., Mathews S. 2011.** Recent synchronous radiation of a living fossil. *Science* **334**(6057), 796-799.
187. **Hermsen EJ., Taylor TN., Taylor EL, Stevenson DW. 2006.** Cataphylls of the Middle Triassic cycad *Antarcticycas schopfii* and new insights into cycad evolution. *American Journal of Botany* **93**(5), 724-738.
188. **Wang J. 2010.** Late Paleozoic macrofloral assemblages from Weibei Coalfield, with reference to vegetational change through the Late Paleozoic Ice-age in the North China Block. *International Journal of Coal Geology* **83**(2-3), 292-317.
189. **Henderson CM, Gradstein FM., Hammer O. 2012.** The Permian Period. In *The geologic timescale 2012* (eds. Gradstein F.M., Ogg J.G., Schmitz M., Ogg G.), pp. 653-679, Elsevier.
190. **Wellman CH, Gensel PG, Taylor WA. 2009.** Spore wall ultrastructure in the early lycopsid *Leclercqia* (Protolopodioidenales) from the Lower Devonian of North America: evidence for a fundamental division in the lycopsids. *American Journal of Botany* **96**(10), 1849-1860.
191. **Meyer-Berthaud B, Fairon-Demaret M, Steemans P, Talent J, Gerrienne P. 2003.** The plant *Leclercqia* (Lycopsida) in Gondwana: implications for reconstructing Middle Devonian palaeogeography. *Geological Magazine* **140**(2), 119-130.
